# Supplementary material for: ortho-[1-(p-MeOPhenyl)vinyl]benzoate PMPVB as a recyclable auxiliary for C–O and C–S bond formation reactions under Brønsted acid catalysis
Source: Royal Society of Chemistry journal article supplement (doi:10.1039/d3ob00839h), 2023-01-01
Supplement: d3ob00839h1.pdf [file d3ob00839h1.pdf]

## Supporting Information

### ***Ortho*-[1-(*p*-MeOPhenyl) Vinyl] Benzoate (PMPVB) as a Recyclable auxiliary for C-O and C-S bond formation Reactions Under Brønsted acid Catalysis**

Sangay Moktan, Mahendra K.V.Rotta, Suwendu Halder, Priyanka Pradhan and Pavan K. Kancharla\*

Department of Chemistry, Indian Institute of Technology Guwahati, Guwahati, Assam, 781039

\*Pavankancharla@iitg.ac.in

## **Index**

|                                                                     |           |
|---------------------------------------------------------------------|-----------|
| <b>General Information.....</b>                                     | <b>3</b>  |
| <b>General scheme for the synthesis of PMPVB donors.....</b>        | <b>5</b>  |
| <b>General procedure 1.....</b>                                     | <b>5</b>  |
| <b>General scheme for <i>O</i> and <i>S</i> bond formation.....</b> | <b>9</b>  |
| <b>General procedure2.....</b>                                      | <b>10</b> |
| <b>References.....</b>                                              | <b>25</b> |
| <b>Spectra of Substrates.....</b>                                   | <b>28</b> |
| <b>Crystal data .....</b>                                           | <b>73</b> |

## General Information

All solvents purchased were of commercial grade, and reagents were purchased from Sigma-Aldrich, Merck, Carbosynth, Spectrochem, Alfa Aesar, and Avra and used without further purification for reactions.

### *Analysis*

Reactions were monitored by TLC on Kiesel gel 60 F254 (Merck). Detection was done by examination under UV light (254nm). Purification was performed in normal phase using silica gel [Merck, 60-120 mesh]. Extracts were concentrated in vacuo using both Büchi rotary evaporator (bath temperatures up to 40 °C) at a pressure of either 15 mmHg (diaphragm pump) and 0.7 mmHg (oil pump) at rt. <sup>1</sup>H- and <sup>13</sup>C NMR were recorded on a Bruker 600 MHz, 500 MHz, and 400 MHz spectrometers using Chloroform-d as solvent. Chemical shift values are reported in ppm with the solvent as the internal standard (Chloroform-d: 7.26 for <sup>1</sup>H,  $\delta$  77.16 for <sup>13</sup>C). Data are reported as follows: chemical shifts ( $\delta$ ), multiplicity (s=singlet, d=doublet, dd = doublet of doublet, ddd = doublet of doublet of doublets, dt=doublet of triplet, t = triplet, td = triplet of doublet, q = quartet, m = multiplet) etc., coupling constants J(Hz), and integration. High-resolution mass measurements were performed using Agilent technologies mass spectrometer (QTOF-ESI mode). Suitable crystals for single-crystal X-ray diffraction (SCXRD) analysis were obtained by dissolving "**1a** and **3as**" in CH<sub>2</sub>Cl<sub>2</sub> and Hexane, followed by slow evaporation of solvent mixture at room temperature. The X-ray diffraction data were collected at 296 K with Mo K  $\alpha$  radiation ( $\lambda=0.71073$  Å) using a Micro focused based Bruker D8 QUEST diffractometer equipped with a graphite monochromator. Apex IV software was used for data collection and indexing of the reflections and determining the unit cell parameters; the collected data were integrated using Saint Software. The structures were solved by Intrinsic phasing and refined by full-matrix least-squares calculations using SHELXTL 2018 software.

## Synthesis of *ortho*-[1-(*p*-methoxyphenyl)vinyl]benzoic acid

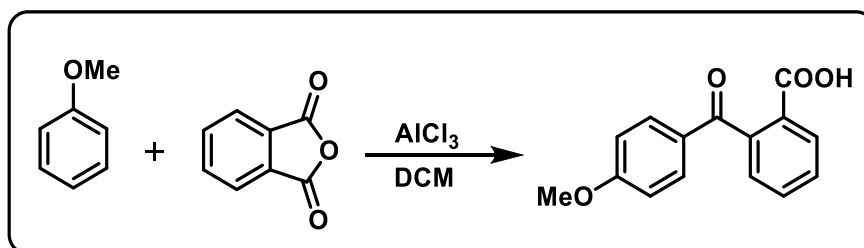

**Scheme1.** Preparation of 2-(4-methoxybenzoyl) benzoic acid

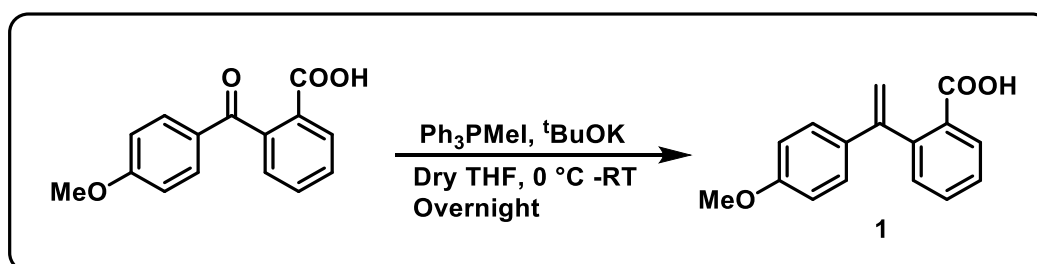

**Scheme2.** Preparation of *ortho*-[1-(*p*-methoxyphenyl) vinyl] benzoic acid

Compound 1 was formed by following the procedures described in the literature.<sup>1</sup>

## Different nucleophiles used in this study

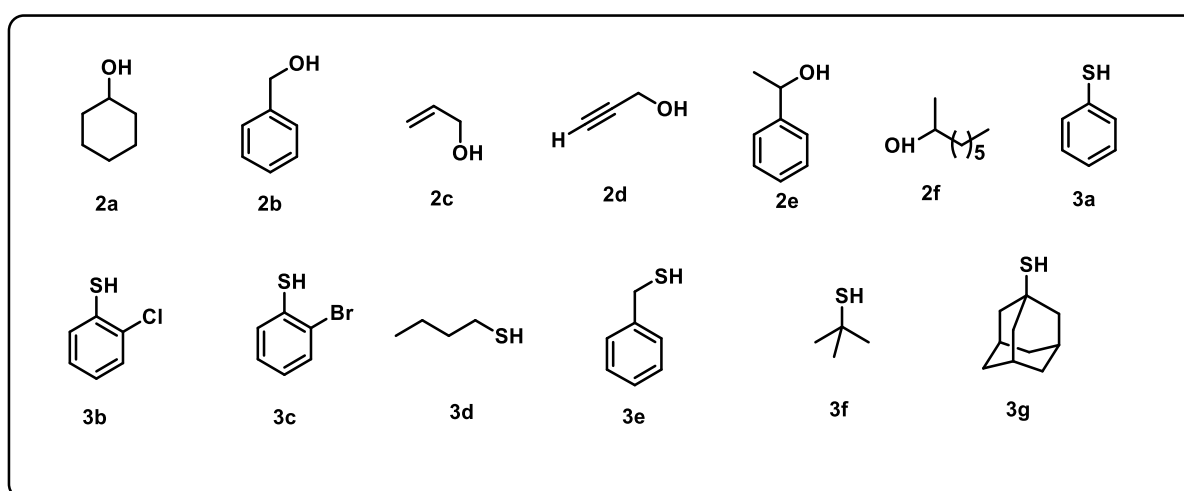

## Different primary and secondary alcohol used in this study

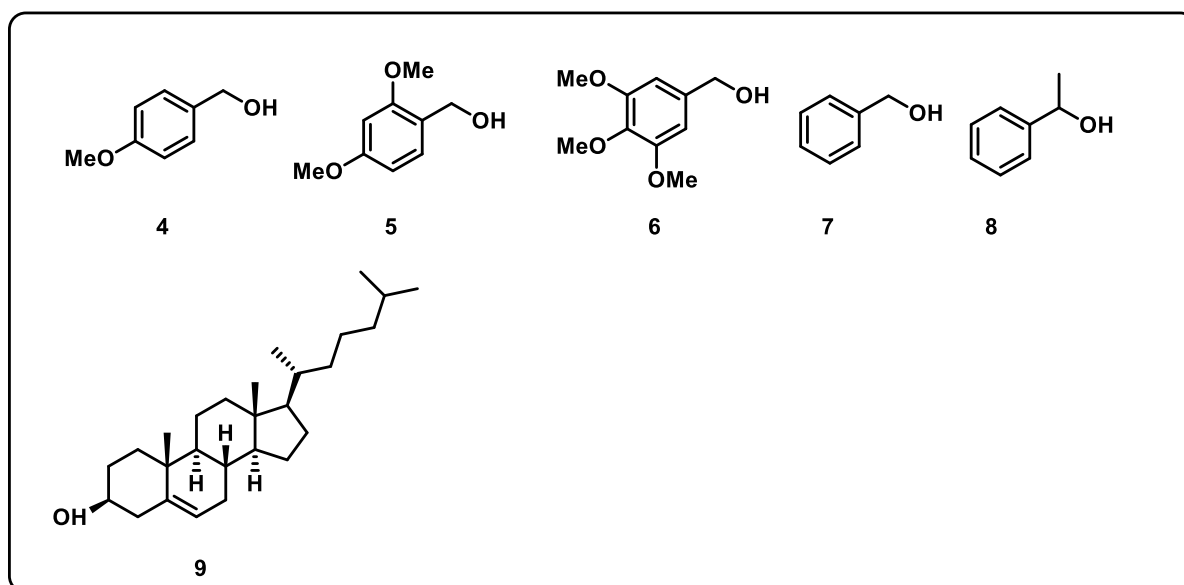

## General scheme for the synthesis of PMPVB donors

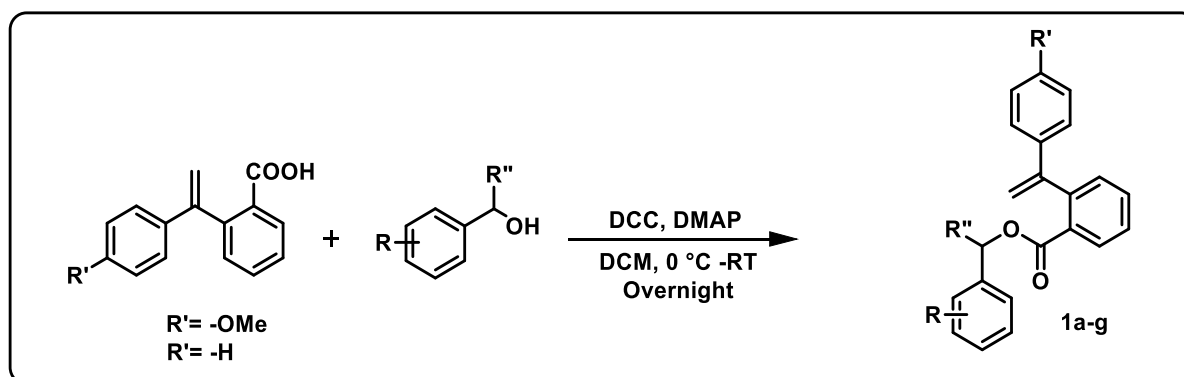

### Scheme3. Different PMPVB donors were used for this study

Different methoxy substituted benzyl alcohols, and ortho-[1-(p-methoxyphenyl) vinyl] benzoic acid was used in the synthesis.

### General procedure 1

At 0°C, 4-dimethylaminopyridine (0.2equiv.) and N, N'-dicyclohexylcarbodiimide (2 equiv.) were added to the mixture of different substituted primary and secondary alcohol (1.0 equiv.) and benzoic acid (2.0 equiv.) in dry DCM. The mixture was allowed to cool to room temperature before being stirred overnight. After the reaction was finished, the solution was diluted with CH<sub>2</sub>Cl<sub>2</sub> and washed with water and brine. The organic layer was filtered and concentrated in vacuo after drying over Na<sub>2</sub>SO<sub>4</sub>. The residue was purified using flash

column chromatography to obtain the PMPVB donors (**1a-1g**).

#### Synthesis of 4-methoxybenzyl-2-(1-(4-methoxyphenyl)vinyl)benzoate (**1a**)

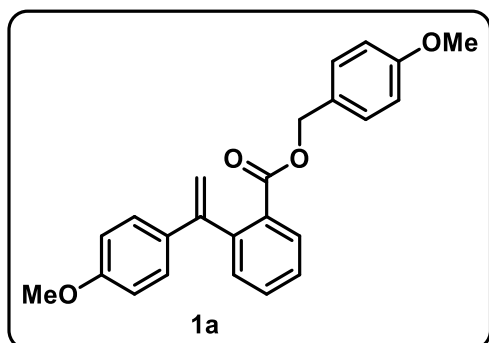

**General procedure 1** was used to make compound **1a** from **4** (200.2 mg, 1.46 mmol). To obtain this, the crude product was purified using flash column chromatography, **1a** (499.17 mg, 92 %) as a white solid,  $R_f = 0.6$  (Hexane/EtOAc, 9:1, v/v).  **$^1\text{H}$  NMR (500 MHz, Chloroform-*d*)**  $\delta$  7.80 (dd,  $J = 7.8, 1.4$  Hz, 1H), 7.48 (td,  $J = 7.6, 1.4$  Hz, 1H), 7.41 – 7.29 (m, 2H), 7.16 – 7.07 (m, 4H), 6.85 – 6.71 (m, 4H), 5.53 (s, 1H), 5.09 (s, 1H), 4.93 (s, 2H), 3.79 (s, 4H), 3.78 (s, 3H).  **$^{13}\text{C}$  NMR (126 MHz, Chloroform-*d*)**  $\delta$  167.8, 159.5, 159.2, 148.8, 142.9, 133.5, 131.5, 131.4, 131.1, 130.0, 129.8, 128.0, 127.9, 127.5, 113.7, 113.5, 112.5, 66.5, 55.3, 55.2. **HRMS (ESI)** calcd for  $\text{C}_{24}\text{H}_{22}\text{KO}_4$   $[\text{M}+\text{K}]^+$  413.1150, found 413.1145.

#### Synthesis of 2,4-dimethoxybenzyl-2-(1-(4-methoxyphenyl)vinyl)benzoate (**1b**)

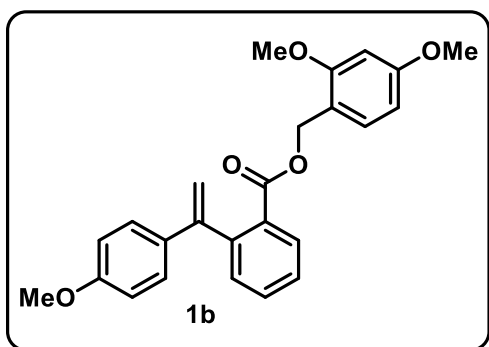

**General procedure 1** was used to make compound **1b** from **5** (205.4 mg, 1.22 mmol). To obtain this, the crude product was purified using flash column chromatography, **1** (419.85 mg, 85 %) as a colourless oil,  $R_f = 0.3$  (Hexane/EtOAc, 9:1, v/v).  **$^1\text{H}$  NMR (400 MHz, Chloroform-*d*)**  $\delta$  7.80 (dd,  $J = 7.7, 1.4$  Hz, 1H), 7.47 (td,  $J = 7.5, 1.5$  Hz, 1H), 7.41 – 7.28 (m, 2H), 7.15 – 7.10 (m, 2H), 7.06 (d,  $J = 8.1$  Hz, 1H), 6.79 – 6.71 (m, 2H), 6.42 – 6.33 (m, 2H), 5.50 (d,  $J = 1.1$  Hz, 1H), 5.09 (d,  $J = 1.1$  Hz, 1H), 5.00 (s, 2H), 3.80 (s, 3H), 3.78 (s, 3H), 3.71 (s, 3H).  **$^{13}\text{C}$  NMR (101 MHz, Chloroform-*d*)**  $\delta$  167.9, 161.0, 159.0, 158.7, 148.8, 142.8, 133.6, 131.6, 131.2, 131.0, 131.0, 129.7, 128.0, 127.4, 116.6, 113.4, 112.5, 103.8, 98.2, 62.0, 55.3, 55.3, 55.2. **HRMS (ESI)** calcd for  $\text{C}_{25}\text{H}_{24}\text{NaO}_5$   $[\text{M}+\text{Na}]^+$  427.1516, found 427.1509.

### Synthesis of 2,4,6-trimethoxybenzyl-2-(1-(4-methoxyphenyl)vinyl)benzoate (**1c**)

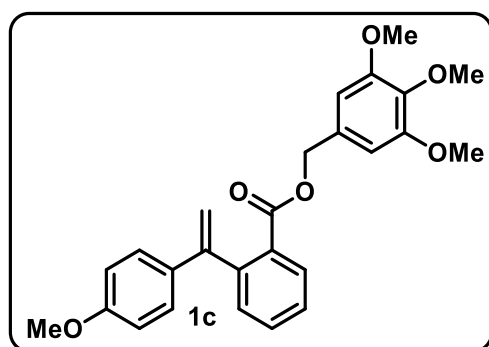

**General procedure 1** was used to make compound **1c** from **6** (202 mg, 1.02 mmol). To obtain this, the crude product was purified using flash column chromatography, **1c** (358.65 mg, 81 %) as a colourless oil,  $R_f = 0.45$  (Hexane/EtOAc, 9:1, v/v). **<sup>1</sup>H NMR (600 MHz, Chloroform-d)**  $\delta$  7.82 (dd,  $J = 7.7, 1.4$  Hz, 1H), 7.51 (td,  $J = 7.5, 1.4$  Hz, 1H), 7.40 (td,  $J = 7.5, 1.3$  Hz, 1H), 7.34 (dd,  $J = 7.7, 1.3$  Hz, 1H), 7.14 – 7.07 (m, 2H), 6.78 – 6.71 (m, 2H), 6.47 (s, 2H), 5.52 (d,  $J = 1.1$  Hz, 1H), 5.11 (s, 1H), 4.91 (s, 2H), 3.83 (s, 3H), 3.79 (s, 6H), 3.77 (s, 3H). **<sup>13</sup>C NMR (126 MHz, Chloroform-d)**  $\delta$  167.8, 159.2, 153.2, 149.0, 142.8, 138.0, 133.5, 131.6, 131.2, 131.1, 129.8, 128.0, 127.6, 113.5, 112.4, 105.6, 67.0, 60.8, 56.1, 55.2. **HRMS (ESI)** calcd for C<sub>26</sub>H<sub>27</sub>O<sub>6</sub> [M+H]<sup>+</sup> 435.1802, found 435.1803.

### Synthesis of benzyl-2-(1-(4-methoxyphenyl)vinyl)benzoate (**1d**)

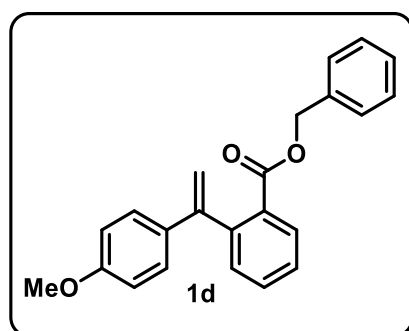

**General procedure 1** was used to make compound **1d** from **7** (203.6 mg, 1.88 mmol). To obtain this, the crude product was purified using flash column chromatography, **1d** (531.72 mg, 82 %) as a white solid,  $R_f = 0.65$  (Hexane/EtOAc, 9:1, v/v). **<sup>1</sup>H NMR (500 MHz, Chloroform-d)**  $\delta$  7.82 (d,  $J = 7.7$  Hz, 1H), 7.48 (t,  $J = 7.6$  Hz, 1H), 7.41 – 7.31 (m, 2H), 7.26 (q,  $J = 2.7$  Hz, 3H), 7.21 – 7.08 (m, 4H), 6.78 – 6.72 (m, 2H), 5.53 (s, 1H), 5.11 (s, 1H), 4.99 (s, 2H), 3.76 (s, 3H). **<sup>13</sup>C NMR (126 MHz, Chloroform-d)**  $\delta$  167.6, 159.2, 148.8, 142.9, 135.7, 133.5, 131.5, 131.2, 129.8, 128.3, 128.1, 127.9, 127.5, 113.5, 112.5, 66.6, 55.3. **HRMS (ESI)** calcd for C<sub>23</sub>H<sub>21</sub>O<sub>3</sub> [M+H]<sup>+</sup> 345.1485, found 345.1479.

### Synthesis of 1-phenylethyl-2-(1-(4-methoxyphenyl)vinyl)benzoate (**1e**)

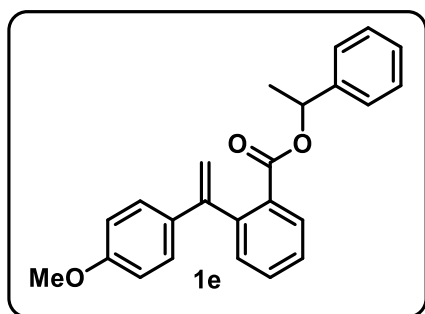

**General procedure 1** was used to make compound **1e** from **8** (207.6 mg, 1.70 mmol). To obtain this, the crude product was purified using flash column chromatography, **3f** (536.04 mg, 88%) as a colourless oil,  $R_f = 0.3$  (Hexane/EtOAc, 9:1, v/v).  **$^1\text{H}$  NMR (400 MHz, Chloroform-*d*)**  $\delta$  7.82 (dd,  $J = 7.8, 1.5$  Hz, 1H), 7.47 (td,  $J = 7.5, 1.5$  Hz, 1H), 7.37 (td,  $J = 7.6, 1.4$  Hz, 1H), 7.31 (dd,  $J = 7.5, 1.4$  Hz, 1H), 7.26 – 7.13 (m, 7H), 6.78 – 6.69 (m, 2H), 5.81 (q,  $J = 6.5$  Hz, 1H), 5.56 (d,  $J = 1.0$  Hz, 1H), 5.09 (d,  $J = 1.0$  Hz, 1H), 3.76 (s, 3H), 1.33 (d,  $J = 6.6$  Hz, 3H).  **$^{13}\text{C}$  NMR (101 MHz, Chloroform-*d*)**  $\delta$  167.1, 159.1, 148.4, 142.7, 141.3, 133.3, 131.5, 131.4, 131.1, 129.7, 128.2, 127.9, 127.6, 127.4, 126.1, 113.4, 112.3, 73.2, 55.2, 21.8. **HRMS (ESI)** calcd for  $\text{C}_{24}\text{H}_{22}\text{KO}_3$   $[\text{M}+\text{K}]^+$  397.1201, found 397.1200.

### Synthesis of cholesteryl-2-(1-(4-methoxyphenyl)vinyl)benzoate (**1f**)

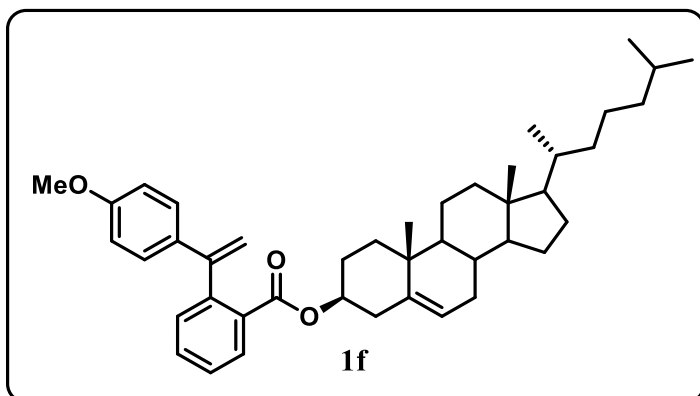

**General procedure 1** was used to make compound **1f** from **9** (209.2 mg, 0.54 mmol). To obtain this, the crude product was purified using flash column chromatography, **3f** (337.04 mg, 84%) as a white solid,  $R_f = 0.25$  (Hexane/EtOAc, 9:1, v/v).  **$^1\text{H}$  NMR (400 MHz, Chloroform-*d*)**  $\delta$  7.80 (d,  $J = 7.5$  Hz, 1H), 7.47 (t,  $J = 7.5$  Hz, 1H), 7.41 – 7.28 (m, 2H), 7.19 (d,  $J = 9.0$  Hz, 2H), 6.79 (d,  $J = 8.6$  Hz, 2H), 5.61 (d, 1H), 5.28 (d,  $J = 5.6$  Hz, 1H), 5.11 (d, 1H), 4.52 (dq,  $J = 10.6, 5.6$  Hz, 1H), 3.76 (s, 3H), 2.16 – 2.05 (m, 2H), 1.96 (ddt,  $J = 22.7, 13.7, 3.1$  Hz, 2H), 1.87 – 1.68 (m, 3H), 1.62 – 1.29 (m, 11H), 1.19 – 1.00 (m, 10H), 0.99 – 0.78 (m, 12H), 0.66 (s, 3H).  **$^{13}\text{C}$  NMR (101 MHz, Chloroform-*d*)**  $\delta$  167.1, 159.2, 148.8, 142.6, 139.7, 133.5, 131.8, 131.2,



131.1, 129.5, 127.9, 127.4, 122.4, 113.5, 112.3, 74.7, 56.7, 56.1, 55.2, 50.0, 42.3, 39.7, 39.5, 37.5, 36.9, 36.5, 36.2, 35.8, 31.9, 31.8, 28.2, 28.0, 27.2, 24.3, 23.8, 22.8, 22.6, 21.0, 19.2, 18.7, 11.8. **HRMS (ESI)** calcd for C<sub>43</sub>H<sub>59</sub>O<sub>3</sub> [M+H]<sup>+</sup> 623.4459, found 623.4471.

### Synthesis of 4-methoxybenzyl-2-(1-phenylvinyl)benzoate

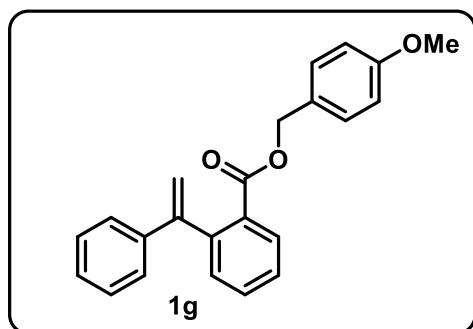

**General procedure 1** was used to make compound **1g** from **7** (205.3 mg, 1.83 mmol). To obtain this, the crude product was purified using flash column chromatography, **3d** (409.42 mg, 80%) as a colourless oil, R<sub>f</sub> = 0.7 (Hexane/EtOAc, 9:1, v/v). **<sup>1</sup>H NMR (500 MHz, Chloroform-d)** δ 7.82 (d, *J* = 7.7 Hz, 1H), 7.50 (t, *J* = 7.5 Hz, 1H), 7.41 – 7.32 (m, 2H), 7.26 – 7.16 (m, 5H), 7.10 (d, *J* = 8.5 Hz, 2H), 6.79 (d, *J* = 8.5 Hz, 2H), 5.63 (s, 1H), 5.21 (s, 1H), 4.89 (s, 2H), 3.79 (s, 3H). **<sup>13</sup>C NMR (126 MHz, Chloroform-d)** 167.6, 159.4, 149.4, 142.6, 140.7, 131.6, 131.2, 129.9, 129.9, 128.1, 127.8, 127.6, 127.5, 126.7, 114.2, 113.7, 66.4, 55.2, 30.9. **HRMS (ESI)** calcd for C<sub>23</sub>H<sub>21</sub>O<sub>3</sub> [M+H]<sup>+</sup> 345.1485, found 345.1472.

### General scheme for *O* and *S* bond formation

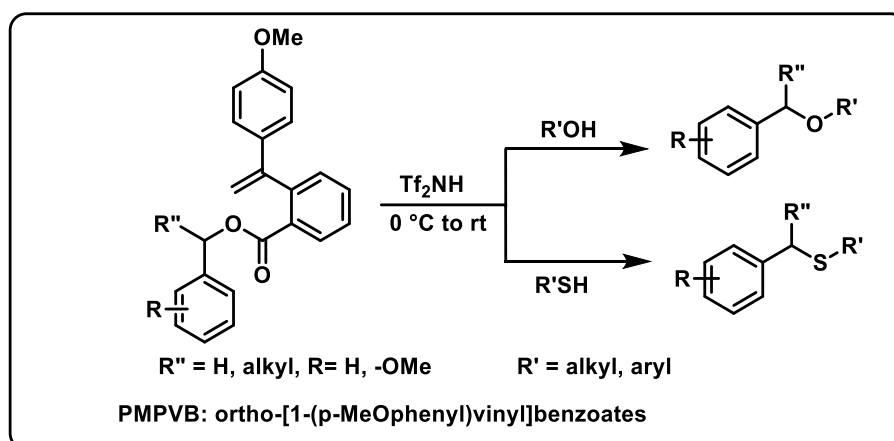

### General procedure 2

A different primary and secondary derived PMPVB donor (1 equiv) and nucleophile (2 equiv) solution in dry DCM (0.05M) was mixed at room temperature and stirred for 12 h for the alcohol nucleophile and 2 h for the thiol nucleophile under Ar atmosphere and then RB was

allowed to cool to 0 °C and TF<sub>2</sub>NH was added. After completion of reaction TLC were checked. The reaction was quenched by the addition of Et<sub>3</sub>N and work up with water, wash with brine, dried by Na<sub>2</sub>SO<sub>4</sub> and concentrated in rotavapor. The resulting crude reaction mixture was purified through Flash column chromatography to afford the unsymmetrical ether and thioether product.

#### Synthesis of 1-((Cyclohexyloxy)methyl)-4-methoxybenzene (**2aa**)<sup>2</sup>

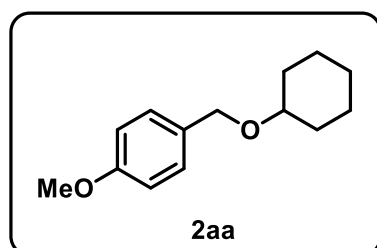

**General procedure 2** was used to prepare compound **2aa** from **1a** (51.2mg, 0.14 mmol). Flash column chromatography was used to refine the crude product to get **2aa** (24.70 mg, 82%) as a colourless oil, R<sub>f</sub> = 0.8 (Hexane/EtOAc, 9:1, v/v). <sup>1</sup>H NMR (500 MHz, Chloroform-d) δ 7.26 (d, *J* = 9.2, 2.5 Hz, 2H), 6.87 (d, *J* = 7.0 Hz, 2H), 4.47 (s, *J* = 1.8 Hz, 2H), 3.79 (s, 3H), 3.33 (m, *J* = 9.1, 4.6, 2.8 Hz, 1H), 1.96-1.88 (d, *J* = 11.3 Hz, 2H), 1.80 – 1.71 (m, 2H), 1.56 – 1.49 (m, 1H), 1.29-1.37 (m, *J* = 10.8 Hz, 2H), 1.22-1.28 (m, *J* = 10.3 Hz, 3H). <sup>13</sup>C NMR (126 MHz, Chloroform-d) δ 159.0, 131.5, 129.0, 113.8, 76.7, 69.3, 55.3, 32.3, 25.9, 24.2.

#### Synthesis of 1-((Benzyloxy)methyl)-4-methoxybenzene (**2ab**)<sup>2</sup>

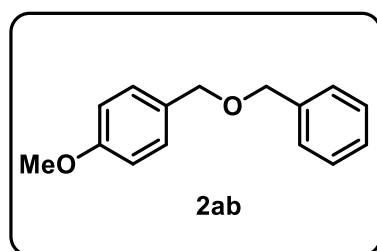

**General procedure 2** was used to prepare compound **2ab** from **1a** (51.2mg, 0.14 mmol). Flash column chromatography was used to refine the crude product to get **2ab** (22.52 mg, 73%) as a colourless oil, R<sub>f</sub> = 0.7 (Hexane/EtOAc, 9:1, v/v). <sup>1</sup>H NMR (600 MHz, Chloroform-d) δ 7.38 – 7.32 (m, 4H), 7.32 – 7.25 (m, 3H), 6.89 (d, *J* = 8.6 Hz, 2H), 4.53 (s, 2H), 4.49 (s, 2H), 3.80 (s, 3H). <sup>13</sup>C NMR (151 MHz, Chloroform-d) δ 159.2, 138.4, 130.4, 129.4, 128.4, 127.8, 127.6, 113.8, 71.8, 71.8, 55.3.

#### Synthesis of 1-methoxy-4-((prop-2-yn-1-yloxy)methyl)benzene (**2ac**)<sup>2</sup>

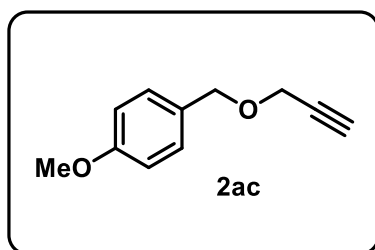

**General procedure 2** was used to prepared compound **2ac** from **1a** (53.2mg, 0.14 mmol). Flash column chromatography was used to refine the crude product to get **2ac** (19.52 mg, 78 %) as a yellow oil,  $R_f = 0.8$  (Hexane/EtOAc, 9:1, v/v).  $^1\text{H NMR}$  (500 MHz, Chloroform-d)  $\delta$  7.28 (d,  $J = 8.7$  Hz, 2H), 6.88 (d,  $J = 8.7$  Hz, 2H), 4.54 (s, 2H), 4.14 (d,  $J = 2.6$  Hz, 2H), 3.80 (s, 3H), 2.45 (t,  $J = 2.4$  Hz, 1H).  $^{13}\text{C NMR}$  (126 MHz, Chloroform-d)  $\delta$  159.5, 129.8, 129.4, 113.9, 79.8, 74.5, 71.2, 56.7, 55.3.

#### Synthesis of 1-((allyloxy)methyl)-4-methoxybenzene (**2ad**)<sup>3</sup>

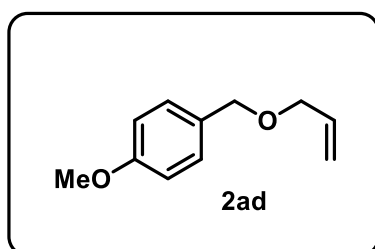

**General procedure 2** was used to prepared compound **2ad** from **1a** (50.6mg, 0.14 mmol). Flash column chromatography was used to refine the crude product to get **2ad** (18.10 mg, 75%) as a colourless oil,  $R_f = 0.8$  (Hexane/EtOAc, 9:1, v/v).  $^1\text{H NMR}$  (500 MHz, Chloroform-d)  $\delta$  7.29 (d,  $J = 2.8$  Hz, 2H), 6.88 (d,  $J = 8.7$  Hz, 2H), 5.90-6.00 (m,  $J = 16.0, 10.8, 5.6$  Hz, 1H), 5.30 (dd,  $J = 17.2, 1.6$  Hz, 1H), 5.20 (dd,  $J = 11.2, 2.1$  Hz, 1H), 4.46 (s, 2H), 4.00 (dt,  $J = 5.6, 1.4$  Hz, 2H), 3.81 (s, 3H).  $^{13}\text{C NMR}$  (126 MHz, Chloroform-d)  $\delta$  159.2, 134.9, 130.4, 129.4, 117.1, 113.8, 71.8, 70.9, 55.2.

#### Synthesis of 1-((phenylethoxy)methyl)-4-methoxybenzene (**2ae**)<sup>4</sup>

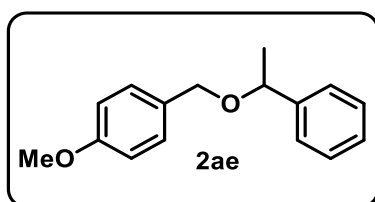

**General procedure 2** was used to prepared compound **2ae** from **1a** (54.3mg, 0.14 mmol). Flash column chromatography was used to refine the crude product to get **2ae** ( 29.17 mg, 83%) as a colourless oil,  $R_f = 0.65$  (Hexane/EtOAc, 9:1 , v/v).  $^1\text{H NMR}$  (400 MHz, Chloroform-d)  $\delta$  7.40 – 7.27 (m, 5H), 7.23 (d,  $J = 8.6$  Hz, 2H), 6.87 (d,  $J = 8.7$  Hz, 2H), 4.48 (q,  $J = 6.5$  Hz,

1H), 4.38 (d,  $J = 11.3$  Hz, 1H), 4.22 (d,  $J = 11.4$  Hz, 1H), 3.80 (s, 3H), 1.46 (d,  $J = 6.5$  Hz, 3H).  $^{13}\text{C}$  NMR (101 MHz, Chloroform-d)  $\delta$  159.1, 143.8, 130.7, 129.3, 128.5, 127.5, 126.4, 113.8, 77.3, 77.0, 76.9, 76.7, 69.9, 55.3, 24.3.

#### Synthesis of 1-((octan-2-yloxy)methyl)-4-methoxybenzene (2af)<sup>5</sup>

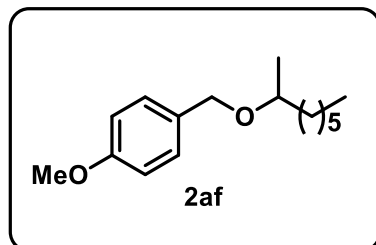

**General procedure 2** was used to prepared compound **2af** from **1a** (52mg, 0.14 mmol). Flash column chromatography was used to refine the crude product to get **2af** ( 27.82 mg, 80%) as a colourless oil,  $R_f = 0.7$  (Hexane/EtOAc, , v/v.  $^1\text{H}$  NMR (400 MHz, Chloroform-d)  $\delta$  7.27 (d,  $J = 8.4$  Hz, 2H), 6.87 (d,  $J = 8.4$  Hz, 2H), 4.49 (d,  $J = 11.3$  Hz, 1H), 4.39 (d,  $J = 11.4$  Hz, 1H), 3.80 (s, 3H), 3.48 (q,  $J = 6.0$  Hz, 1H), 1.64 – 1.26 (m, 10H), 1.17 (d,  $J = 6.1$  Hz, 3H), 0.88 (t,  $J = 6.6$  Hz, 3H).  $^{13}\text{C}$  NMR (101 MHz, Chloroform-d)  $\delta$  159.0, 131.3, 129.2, 113.7, 74.6, 69.9, 55.3, 36.7, 31.9, 29.4, 25.5, 22.6, 19.6, 14.1.

#### Synthesis of 1-(benzyloxy)ethylbenzene (2ag)<sup>6</sup>

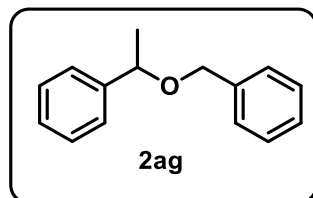

**General procedure 2** was used to prepared compound **2ag** from **1e** (52.6mg, 0.15 mmol). Flash column chromatography was used to refine the crude product to get **2ag** (23.40 mg, 75%) as a colourless oil,  $R_f = 0.8$  (Hexane/EtOAc, 9:1, v/v.  $^1\text{H}$  NMR (500 MHz, Chloroform-d)  $\delta$  7.39 – 7.25 (m, 10H), 4.50 (q,  $J = 6.5$  Hz, 1H), 4.45 (d,  $J = 11.9$  Hz, 1H), 4.30 (d,  $J = 11.8$  Hz, 1H), 1.48 (d,  $J = 6.4$  Hz, 3H).  $^{13}\text{C}$  NMR (126 MHz, Chloroform-d)  $\delta$  142.7, 137.7, 127.5, 127.3, 126.7, 126.5, 126.4, 125.3, 76.2, 69.3, 23.2.

#### Synthesis of 1-(prop-2-yn-1-yloxy)ethylbenzene (2ah)<sup>7</sup>

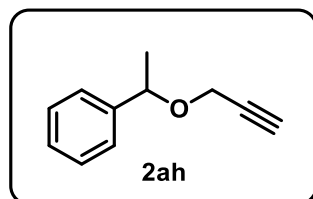

**General procedure 2** was used to prepared compound **2ah** from **1e** (50.4 mg, 0.14 mmol). Flash column chromatography was used to refine the crude product to get **2ah** (17.60 mg, 78%) as a colourless oil,  $R_f = 0.8$  (Hexane/EtOAc, 9:1, v/v).  $^1\text{H NMR}$  (400 MHz, Chloroform-d)  $\delta$  7.33 – 7.14 (m, 5H), 4.59 (q,  $J = 6.5$  Hz, 1H), 4.01 (dd,  $J = 15.7, 2.4$  Hz, 1H), 3.81 (dd,  $J = 15.7, 2.4$  Hz, 1H), 2.33 (t,  $J = 2.3$  Hz, 1H), 1.41 (d,  $J = 6.5$  Hz, 3H).  $^{13}\text{C NMR}$  (126 MHz, Chloroform-d)  $\delta$  142.5, 128.6, 127.8, 126.5, 80.1, 76.7, 74.0, 55.5, 23.7.

#### Synthesis of 3-(prop-2-yn-1-yloxy)-cholest-5-ene (**2ai**)<sup>8</sup>

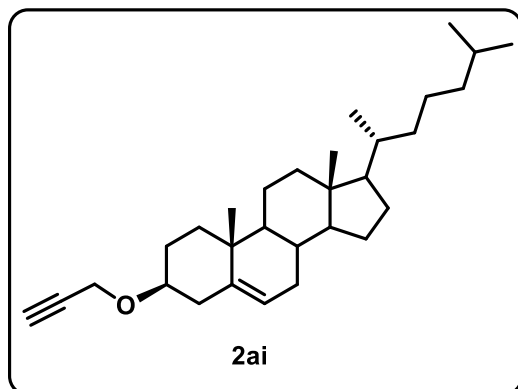

**General procedure 2** was used to prepared compound **2ai** from **1f** (53.2 mg, 0.10 mmol). Flash column chromatography was used to refine the crude product to get **2ai** (30 mg, 82%) as a colourless oil,  $R_f = 0.65$  (Hexane/EtOAc, 9:1, v/v).  $^1\text{H NMR}$  (500 MHz, Chloroform-d)  $\delta$  5.36 (d,  $J = 5.0$  Hz, 1H), 4.19 (d,  $J = 2.3$  Hz, 2H), 3.38 (tt,  $J = 11.0, 4.6$  Hz, 1H), 2.38 (dt,  $J = 11.8, 3.8$  Hz, 2H), 2.27 – 2.18 (m, 1H), 2.05 – 1.77 (m, 5H), 1.59 – 1.41 (m, 7H), 1.39 – 1.26 (m, 4H), 1.24 – 1.05 (m, 8H), 1.00 (s, 5H), 0.92 (d,  $J = 6.6$  Hz, 4H), 0.86 (dd,  $J = 6.6, 2.2$  Hz, 6H), 0.68 (s, 3H).  $^{13}\text{C NMR}$  (126 MHz, Chloroform-d)  $\delta$  140.6, 121.9, 80.5, 78.2, 73.7, 56.8, 56.2, 55.1, 50.2, 42.4, 39.8, 39.6, 38.8, 37.2, 36.9, 36.2, 35.8, 32.0, 31.9, 28.2, 28.1, 28.0, 24.3, 23.9, 22.8, 22.6, 21.1, 19.4, 18.7, 11.9.

#### Synthesis of 3-(allyloxy)-cholest-5-ene (**2aj**)<sup>9</sup>

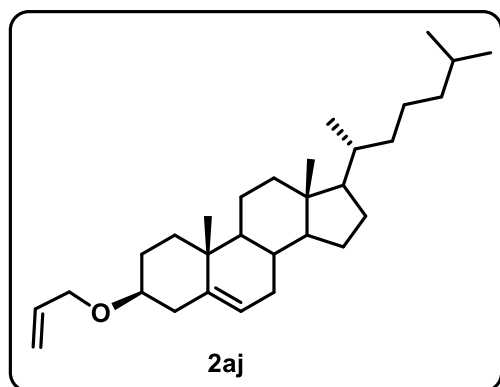

**General procedure 2** was used to prepared compound **2aj** from **1f** (50.1mg, 0.10 mmol). Flash column chromatography was used to refine the crude product to get **2aj** (27 mg, 78%) as a colourless oil,  $R_f = 0.6$  (Hexane/EtOAc, 9:1, v/v).  $^1\text{H NMR}$  (500 MHz, Chloroform-d)  $\delta$  5.93 (ddt,  $J = 16.0, 10.7, 5.6$  Hz, 1H), 5.34 (d,  $J = 3.5$  Hz, 1H), 5.27 (d,  $J = 17.2$  Hz, 1H), 5.15 (d,  $J = 10.4$  Hz, 1H), 4.02 (d,  $J = 5.8$  Hz, 2H), 3.20 (dq,  $J = 11.4, 5.6$  Hz, 1H), 2.41 – 2.33 (m, 1H), 2.22 (t,  $J = 11.8$  Hz, 1H), 2.07 – 1.78 (m, 5H), 1.55 – 1.42 (m, 6H), 1.40 – 1.31 (m, 4H), 1.20 – 1.06 (m, 8H), 1.00 (s, 5H), 0.92 (d,  $J = 6.6$  Hz, 4H), 0.87 (dd,  $J = 6.6, 2.2$  Hz, 6H), 0.68 (s, 3H).  $^{13}\text{C NMR}$  (126 MHz, Chloroform-d)  $\delta$  141.0, 135.6, 121.6, 116.5, 78.6, 69.0, 56.8, 56.2, 50.3, 42.4, 39.9, 39.6, 39.2, 37.3, 36.9, 36.2, 35.8, 32.0, 31.9, 28.5, 28.3, 28.0, 24.3, 23.9, 22.8, 22.6, 21.1, 19.4, 18.8, 11.9.

#### Synthesis of 1-((phenylthio)methyl)-benzene (**3aa**)<sup>10</sup>

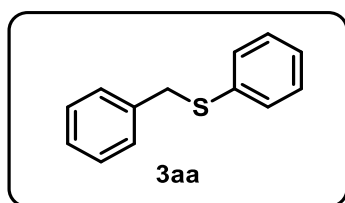

**General procedure 2** was used to prepared compound **3aa** from **1d** (54.2 mg, 0.16 mmol). Flash column chromatography was used to refine the crude product to get **3aa** (23.33 mg, 74%) as a white solid,  $R_f = 0.7$  (Hexane/EtOAc, 9:1, v/v).  $^1\text{H NMR}$  (500 MHz, Chloroform-d)  $\delta$  7.32 – 7.14 (m, 10H), 4.10 (s, 2H).  $^{13}\text{C NMR}$  (126 MHz, Chloroform-d)  $\delta$  137.5, 136.9, 136.4, 129.9, 128.8, 128.5, 127.2, 126.3, 39.1.

#### Synthesis of 1-((phenylthio)methyl)-4-methoxy-benzene (**3ab**)<sup>11</sup>

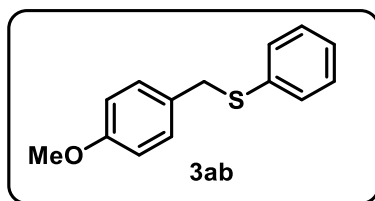

**General procedure 2** was used to prepared compound **3ab** from **1a** (51.7 mg, 0.14 mmol). Flash column chromatography was used to refine the crude product to get **3ab** (26.08 mg, 87%) as a white solid,  $R_f = 0.8$  (Hexane/EtOAc, 9:1, v/v).  $^1\text{H NMR}$  (600 MHz, Chloroform-d)  $\delta$  7.36 – 7.12 (m, 7H), 6.81 (d,  $J = 8.7$  Hz, 2H), 4.07 (s, 2H), 3.77 (s, 3H).  $^{13}\text{C NMR}$  (151 MHz, Chloroform-d)  $\delta$  158.7, 137.0, 129.9, 129.7, 129.4, 128.8, 126.2, 113.9, 55.2, 38.4

#### Synthesis of 1-((phenylthio)methyl)-2,4- dimethoxy-benzene (**3ac**)<sup>9</sup>

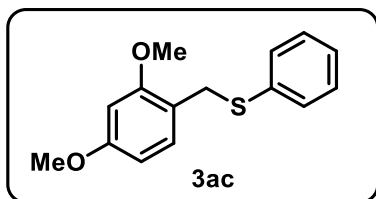

**General procedure 2** was used to prepared compound **3ac** from **1b** (52.3mg, 0.13 mmol). Flash column chromatography was used to refine the crude product to get **3ac** (28.62 mg, 85%) as a colourless oil,  $R_f = 0.75$  (Hexane/EtOAc, 9:1, v/v).  $^1\text{H NMR}$  (500 MHz, Chloroform-d)  $\delta$  7.35 – 7.29 (m, 2H), 7.28 – 7.21 (m, 2H), 7.20 – 7.13 (m, 1H), 7.09 (d,  $J = 8.2$  Hz, 1H), 6.44 (d,  $J = 2.6$  Hz, 1H), 6.39 (dd,  $J = 8.3, 2.5$  Hz, 1H), 4.10 (s, 2H), 3.80 (s, 3H), 3.79 (s, 3H).  $^{13}\text{C NMR}$  (126 MHz, Chloroform-d)  $\delta$  160.2, 158.2, 137.2, 130.7, 129.8, 128.6, 126.0, 118.1, 104.1, 98.6, 55.5, 55.3, 33.0.

#### Synthesis of 1-((phenylthio)methyl)-2,4,6-trimethoxy-benzene (**3ad**)<sup>9</sup>

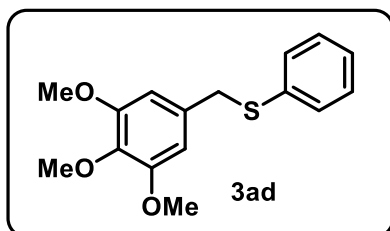

**General procedure 2** was used to prepared compound **3ad** from **1c** (51.6 mg, 0.12 mmol). Flash column chromatography was used to refine the crude product to get **3ad** (30.34 mg, 88%) as a white solid,  $R_f = 0.7$  (Hexane/EtOAc, 9:1, v/v).  $^1\text{H NMR}$  (500 MHz, Chloroform-d)  $\delta$  7.35 – 7.17 (m, 5H), 6.47 (s, 2H), 4.05 (s, 2H), 3.82 (s, 3H), 3.79 (s, 6H).  $^{13}\text{C NMR}$  (126 MHz, Chloroform-d)  $\delta$  153.3, 137.4, 136.4, 133.3, 130.6, 129.0, 126.7, 106.0, 61.0, 56.2, 39.9.

#### Synthesis of 1-((2-chlorophenylthio)methyl)-benzene (**3ae**)<sup>8</sup>

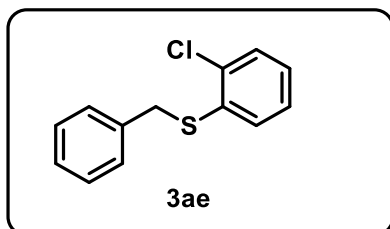

**General procedure 2** was used to prepared compound **3ae** from **1d** (54.2 mg, 0.16 mmol). Flash column chromatography was used to refine the crude product to get **3ae** (26.22 mg, 71%) as a white solid,  $R_f = 0.75$  (Hexane/EtOAc, 9:1, v/v).  $^1\text{H NMR}$  (500 MHz, Chloroform-d)  $\delta$  7.41 – 7.19 (m, 7H), 7.13 (m,  $J = 21.3, 7.4, 1.6$  Hz, 2H), 4.15 (s, 2H).  $^{13}\text{C NMR}$  (126

MHz, Chloroform-d)  $\delta$  136.3, 135.7, 133.8, 129.6, 129.3, 128.9, 128.6, 127.4, 127.1, 126.9, 37.5.

### Synthesis of 1-((2-chlorophenylthio)methyl)-4-methoxy-benzene (**3af**)<sup>12</sup>

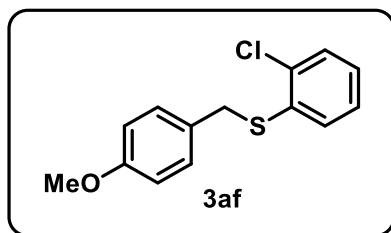

**General procedure 2** was used to prepared compound **3af** from **1a** (50.7 mg, 0.14 mmol). Flash column chromatography was used to refine the crude product to get **3af** ( 27.24 mg, 76%) as a white solid,  $R_f = 0.7$  (Hexane/EtOAc, 9:1 , v/v. <sup>1</sup>H NMR (500 MHz, Chloroform-d)  $\delta$  7.36 (dd,  $J = 7.8, 1.4$  Hz, 1H), 7.29 – 7.22 (m, 3H), 7.14-7.18 (m,  $J = 7.6, 1.6$  Hz, 1H), 7.08-7.12 (m,  $J = 7.8, 1.8$  Hz, 1H), 6.86 – 6.80 (m, 2H), 4.11 (s, 2H), 3.79 (s, 3H). <sup>13</sup>C NMR (126 MHz, Chloroform-d)  $\delta$  159.0, 136.0, 133.7, 130.1, 129.6, 129.4, 128.3, 127.0, 126.8, 114.0, 55.3, 37.0

### .Synthesis of 1-((2-chlorophenylthio)methyl)-2,4-dimethoxy-benzene (**3ag**)

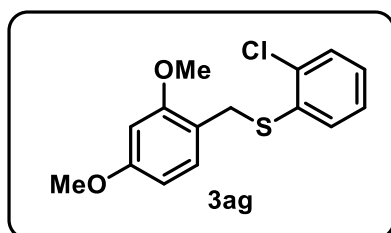

**General procedure 2** was used to prepared compound **3ag** from **1b** (51.3mg, 0.13 mmol). Flash column chromatography was used to refine the crude product to get **3ag** ( 29.16 mg, 78%) as a colourless oil,  $R_f = 0.7$  (Hexane/EtOAc, 9:1 , v/v. <sup>1</sup>H NMR (500 MHz, Chloroform-d)  $\delta$  7.35 (d,  $J = 7.9$  Hz, 1H), 7.27 (dd,  $J = 8.0, 1.7$  Hz, 1H), 7.16 (td,  $J = 7.0, 1.8$  Hz, 2H), 7.09 (td,  $J = 7.5, 1.6$  Hz, 1H), 6.45 (d,  $J = 2.6$  Hz, 1H), 6.41 (dd,  $J = 8.3, 2.5$  Hz, 1H), 4.13 (s, 2H), 3.81 (s, 3H), 3.79 (s, 3H). <sup>13</sup>C NMR (126 MHz, Chloroform-d)  $\delta$  160.4, 158.4, 136.7, 133.4, 130.9, 129.5, 129.0, 127.0, 126.4, 116.8, 104.3, 98.6, 55.5, 55.4, 31.4. HRMS (ESI) calcd for C<sub>15</sub>H<sub>16</sub>ClO<sub>2</sub>S [M+H]<sup>+</sup> 295.0554 found 295.0541.

### Synthesis of 1-((2-bromophenylthio)methyl)-benzene (**3ah**)<sup>13</sup>

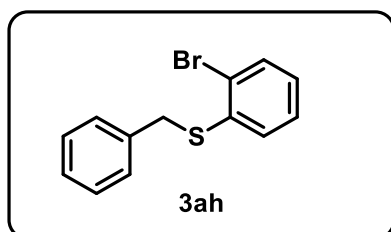



**General procedure 2** was used to prepared compound **3ah** from **1d** (54.6 mg, 0.16 mmol). Flash column chromatography was used to refine the crude product to get **3ah** (32.31 mg, 73%) as a white solid,  $R_f = 0.7$  (Hexane/EtOAc, 9:1, v/v).  $^1\text{H NMR}$  (500 MHz, Chloroform-d)  $\delta$  7.58 – 6.98 (m, 9H), 4.15 (s, 2H).  $^{13}\text{C NMR}$  (126 MHz, Chloroform-d)  $\delta$  137.9, 136.2, 132.9, 129.0, 128.9, 128.6, 127.7, 127.4, 126.9, 123.8, 38.0.

#### Synthesis of 1-((2-bromophenylthio)methyl)-4-methoxy-benzene (**3ai**)<sup>12</sup>

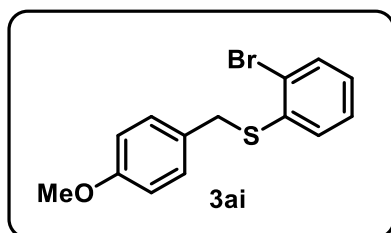

**General procedure 2** was used to prepared compound **3ai** from **1a** (52.2mg, 0.14 mmol). Flash column chromatography was used to refine the crude product to get **3ai** (32.76 mg, 76%) as a white solid,  $R_f = 0.75$  (Hexane/EtOAc, 9:1, v/v).  $^1\text{H NMR}$  (500 MHz, Chloroform-d)  $\delta$  7.53-7.58 (m,  $J = 7.6$  Hz, 1H), 7.33 – 7.23 (m, 2H), 7.24 – 7.19 (m, 2H), 7.00-7.03 (m,  $J = 8.7, 6.2, 2.7$  Hz, 1H), 6.86 – 6.79 (m, 2H), 4.10 (s, 2H), 3.78 (s, 3H).  $^{13}\text{C NMR}$  (126 MHz, Chloroform-d)  $\delta$  158.9, 138.0, 132.9, 130.0, 128.7, 127.9, 127.7, 126.8, 123.5, 114.0, 55.2, 37.3.

#### Synthesis of 1-((2-bromophenylthio)methyl)-2,4-dimethoxy-benzene (**3aj**)

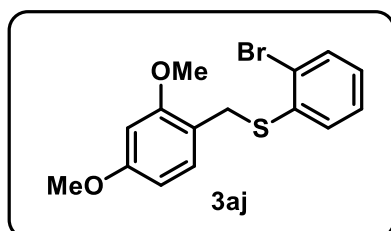

**General procedure 2** was used to prepared compound **3aj** from **1b** (50.4 mg, 0.13 mmol). Flash column chromatography was used to refine the crude product to get **3aj** (33 mg, 78%) as a colourless oil,  $R_f = 0.75$  (Hexane/EtOAc, 9:1, v/v).  $^1\text{H NMR}$  (400 MHz, Chloroform-d)  $\delta$  7.53 (d,  $J = 7.9$  Hz, 1H), 7.24 – 7.17 (m, 3H), 7.01 (td,  $J = 7.4, 2.1$  Hz, 1H), 6.45 (d,  $J = 2.6$  Hz, 1H), 6.42 (dd,  $J = 8.3, 2.5$  Hz, 1H), 4.13 (s, 2H), 3.82 (s, 3H), 3.79 (s, 3H).  $^{13}\text{C NMR}$  (101 MHz, Chloroform-d)  $\delta$  160.4, 158.4, 138.8, 132.7, 130.9, 128.6, 127.6, 126.4, 123.4, 116.6, 104.3, 98.6, 55.5, 55.4, 31.8. **HRMS (ESI)** calcd for  $\text{C}_{15}\text{H}_{16}\text{BrO}_2\text{S}$   $[\text{M}+\text{H}]^+$  339.0049 found 339.0041.

#### Synthesis of 1-((butylthio)methyl)-benzene (**3ak**)<sup>14</sup>

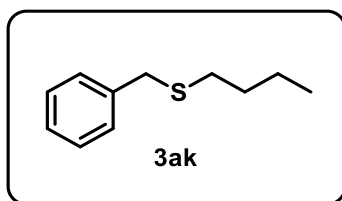

**General procedure 2** was used to prepared compound **3ak** from **1d** (54 mg, 0.16 mmol). Flash column chromatography was used to refine the crude product to get **3ak** (22.05 mg, 78%) as a yellow oil,  $R_f = 0.8$  (Hexane/EtOAc, 9:1, v/v).  $^1\text{H NMR}$  (500 MHz, Chloroform-d)  $\delta$  7.37 – 7.19 (m, 5H), 3.70 (s, 2H), 2.43-2.39 (m, 2H), 1.59 – 1.48 (m, 2H), 1.44 – 1.32 (m, 2H), 0.88 (t,  $J = 7.3$  Hz, 3H).  $^{13}\text{C NMR}$  (126 MHz, Chloroform-d)  $\delta$  138.7, 128.8, 128.4, 126.8, 36.3, 31.3, 31.1, 22.0, 13.6.

#### Synthesis of 1-((butylthio)methyl)-4-methoxybenzene (**3al**)<sup>14</sup>

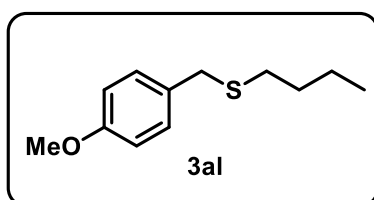

**General procedure 2** was used to prepared compound **3al** from **1a** (53.2 mg, 0.14 mmol). Flash column chromatography was used to refine the crude product to get **3al** (25.10 mg, 84%) as a yellow oil,  $R_f = 0.8$  (Hexane/EtOAc, 9:1, v/v).  $^1\text{H NMR}$  (600 MHz, Chloroform-d)  $\delta$  7.22 (d,  $J = 8.6$  Hz, 2H), 6.84 (d,  $J = 8.6$  Hz, 2H), 3.79 (s, 3H), 3.66 (s, 2H), 2.43 – 2.34 (t, 2H), 1.54 (m,  $J = 7.5, 6.3$  Hz, 2H), 1.37 (m,  $J = 7.3$  Hz, 2H), 0.88 (t,  $J = 7.4$  Hz, 2H).  $^{13}\text{C NMR}$  (151 MHz, Chloroform-d)  $\delta$  158.6, 130.7, 130.0, 114.0, 55.3, 35.7, 31.4, 31.0, 22.0, 13.7.

#### Synthesis of 1-((butylthio)methyl)-2,4,6-trimethoxybenzene (**3am**)

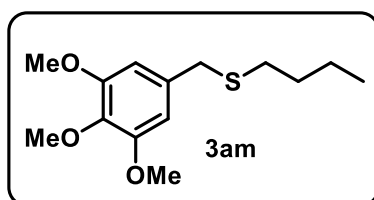

**General procedure 2** was used to prepared compound **3am** from **1c** (52.5 mg, 0.12 mmol). Flash column chromatography was used to refine the crude product to get **3am** ( 29.40 mg, 90%) as a colourless oil,  $R_f = 0.8$  (Hexane/EtOAc, 9:1, v/v).  $^1\text{H NMR}$  (500 MHz, Chloroform-d)  $\delta$  6.55 (s, 2H), 3.86 (s, 6H), 3.83 (s, 3H), 3.66 (s, 2H), 2.46 (t,  $J = 7.4$  Hz, 2H), 1.56 (dd,  $J = 14.5, 7.3$  Hz, 2H), 1.39 (h,  $J = 7.3$  Hz, 2H), 0.90 (t,  $J = 7.3$  Hz, 3H).  $^{13}\text{C NMR}$  (126 MHz,

**Chloroform-d**)  $\delta$  153.2, 137.1, 134.2, 105.9, 60.9, 56.2, 36.9, 31.4, 22.0, 13.7. **HRMS (ESI)** calcd for  $C_{14}H_{22}NaO_3S$   $[M+Na]^+$  293.1182 found 293.1179.

#### Synthesis of 1-((benzylthio)methyl)-benzene (**3an**)<sup>15</sup>

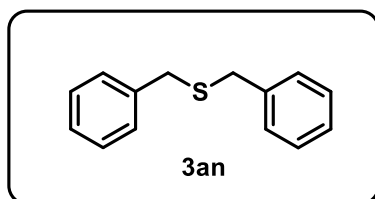

**General procedure 2** was used to prepared compound **3an** from **1d** (50.2 mg, 0.15 mmol). Flash column chromatography was used to refine the crude product to get **3an** ( 22.81 mg, 73%) as a colourless oil,  $R_f = 0.85$  (Hexane/EtOAc, 9:1 , v/v). **<sup>1</sup>H NMR (600 MHz, Chloroform-d)**  $\delta$  7.35 – 7.22 (m, 10H), 3.60 (s, 4H). **<sup>13</sup>C NMR (151 MHz, Chloroform-d)**  $\delta$  137.5, 136.9, 136.4, 129.9, 128.8, 128.5, 127.2, 126.3, 39.1.

#### Synthesis of 1-((benzylthio)methyl)-4-methoxyl-benzene (**3ao**)<sup>16</sup>

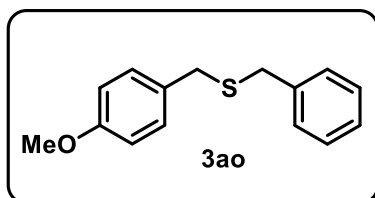

**General procedure 2** was used to prepared compound **3ao** from **1a** (52.3mg, 0.14 mmol). Flash column chromatography was used to refine the crude product to get **3ao** (27.30 mg, 80%) as a colourless oil,  $R_f = 0.8$  (Hexane/EtOAc, 9:1, v/v). **<sup>1</sup>H NMR (500 MHz, Chloroform-d)**  $\delta$  7.33 – 7.16 (m, 7H), 6.85 (d,  $J = 6.1$  Hz, 2H), 3.79 (s, 3H), 3.59 (s, 2H), 3.56 (s, 2H). **<sup>13</sup>C NMR (126 MHz, Chloroform-d)**  $\delta$  158.6, 138.3, 130.1, 129.0, 128.5, 126.9, 113.9, 55.3, 35.6, 35.0.

#### Synthesis of 1-((benzylthio)methyl)-2,4-dimethoxyl-benzene (**3ap**)

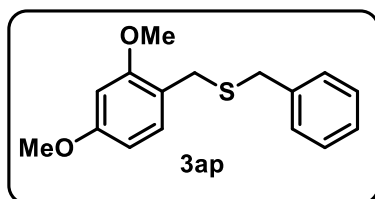

**General procedure 2** was used to prepared compound **3ap** from **1b** (50.7 mg, 0.13 mmol). Flash column chromatography was used to refine the crude product to get **3ap** (28.20 mg, 82%) as a colourless oil,  $R_f = 0.7$  (Hexane/EtOAc, 9:1 , v/v). **<sup>1</sup>H NMR (500 MHz, Chloroform-d)**  $\delta$  7.37 – 7.19 (m, 5H), 7.10 (d,  $J = 8.1$  Hz, 1H), 6.47 – 6.40 (m, 2H), 3.80 (s, 6H), 3.67 (s, 2H), 3.61 (s, 2H). **<sup>13</sup>C NMR (126 MHz, Chloroform-d)**  $\delta$  160.1, 158.3, 138.7, 130.7, 129.0, 128.4,

126.8, 119.1, 104.0, 98.8, 55.5, 55.4, 36.1, 29.7. **HRMS (ESI)** calcd for  $C_{16}H_{19}O_2S$   $[M+H]^+$  275.1100 found 275.1095.

#### Synthesis of 1-((benzylthio)methyl)-2,4,6-trimethoxy-benzene (**3aq**)

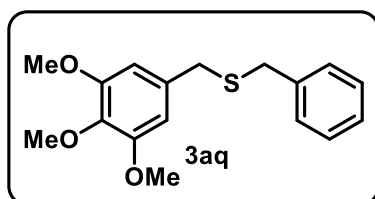

**General procedure 2** was used to prepared compound **3aq** from **1c** (54.2 mg, 0.13 mmol). Flash column chromatography was used to refine the crude product to get **3aq** (32.27 mg, 85%) as a colourless oil,  $R_f = 0.65$  (Hexane/EtOAc, 9:1, v/v).  **$^1H$  NMR (500 MHz, Chloroform-d)**  $\delta$  7.41 – 7.17 (m, 5H), 6.49 (s, 2H), 3.83 (d,  $J = 8.4$  Hz, 9H), 3.64 (s, 2H), 3.56 (s, 2H).  **$^{13}C$  NMR (126 MHz, Chloroform-d)**  $\delta$  153.2, 138.1, 137.1, 133.7, 129.0, 128.5, 127.0, 106.0, 60.9, 56.1, 36.2, 36.0. **HRMS (ESI)** calcd for  $C_{17}H_{20}NaO_3S$   $[M+Na]^+$  327.1025 found 327.1028.

#### Synthesis of 1-((adamantanylthio)methyl)-4-methoxy-benzene (**3ar**)

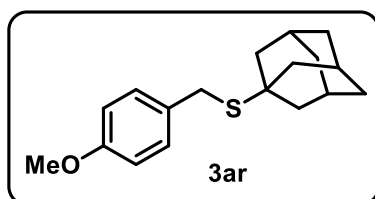

**General procedure 2** was used to prepared compound **3ar** from **1a** (53.4 mg, 0.14 mmol). Flash column chromatography was used to refine the crude product to get **3ar** (29.21 mg, 71%) as a yellow oil,  $R_f = 0.8$  (Hexane/EtOAc, 9:1, v/v).  **$^1H$  NMR (500 MHz, Chloroform-d)**  $\delta$  7.25 (d,  $J = 8.7$  Hz, 2H), 6.82 (d,  $J = 8.7$  Hz, 2H), 3.78 (s, 3H), 3.71 (s, 2H), 2.04 (dd,  $J = 6.8, 3.5$  Hz, 3H), 1.90 (d,  $J = 2.9$  Hz, 6H), 1.69 (qd,  $J = 10.5, 6.1$  Hz, 6H).  **$^{13}C$  NMR (126 MHz, Chloroform-d)**  $\delta$  158.5, 130.1, 130.0, 113.9, 55.3, 45.0, 43.6, 38.8, 36.4, 29.8. **HRMS (ESI)** calcd for  $C_{18}H_{25}OS$   $[M+H]^+$  289.1621 found 289.1620

#### Synthesis of 1-((adamantanylthio)methyl)-2,4,6-trimethoxy-benzene (**3as**)

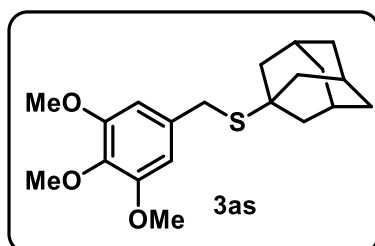

**General procedure 2** was used to prepared compound **3as** from **1c** (51.3mg, 0.12 mmol). Flash column chromatography was used to refine the crude product to get **3as** (31.70 mg, 77%) as a

white solid,  $R_f = 0.75$  (Hexane/EtOAc, 9:1, v/v).  $^1\text{H NMR}$  (500 MHz, Chloroform-d)  $\delta$  6.57 (s, 2H), 3.85 (s, 6H), 3.82 (s, 3H), 3.71 (s, 2H), 2.08 – 2.03 (m, 3H), 1.94 – 1.87 (m, 6H), 1.75 – 1.65 (m, 6H).  $^{13}\text{C NMR}$  (126 MHz, Chloroform-d)  $\delta$  153.2, 136.9, 134.4, 106.0, 60.9, 56.2, 45.2, 43.6, 36.4, 31.2, 29.8. HRMS (ESI) calcd for  $\text{C}_{20}\text{H}_{28}\text{NaO}_3\text{S}$   $[\text{M}+\text{Na}]^+$  371.1651 found 371.1653.

#### Synthesis of 1-((tert-butylthio)methyl)-4-methoxybenzene (**3at**)<sup>17</sup>

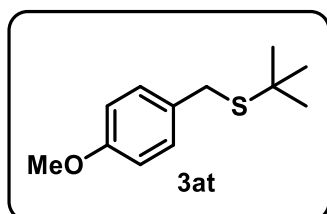

General procedure 2 was used to prepared compound **3at** from **1a** (52.6 mg, 0.14 mmol). Flash column chromatography was used to refine the crude product to get **3at** (21.27 mg, 72%) as a yellow oil,  $R_f = 0.8$  (Hexane/EtOAc, 9:1, v/v).  $^1\text{H NMR}$  (500 MHz, Chloroform-d)  $\delta$  7.25 (d,  $J = 8.7$  Hz, 1H), 6.82 (d,  $J = 8.7$  Hz, 1H), 3.78 (s, 2H), 3.72 (s, 1H), 1.35 (s, 6H).  $^{13}\text{C NMR}$  (126 MHz, Chloroform-d)  $\delta$  158.5, 130.5, 130.0, 114.0, 55.3, 42.7, 32.8, 30.9.

#### Synthesis of 1-((tert-butylthio)methyl)-2,4,6-trimethoxybenzene (**3au**)

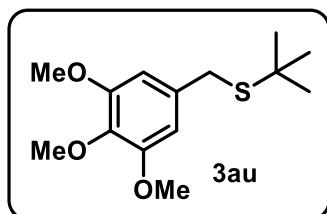

General procedure 2 was used to prepared compound **3au** from **1c** (54.3mg, 0.13 mmol). Flash column chromatography was used to refine the crude product to get **3au** (26.40 mg, 77%) as a colourless oil,  $R_f = 0.8$  (Hexane/EtOAc, 9:1, v/v).  $^1\text{H NMR}$  (500 MHz, Chloroform-d)  $\delta$  6.57 (s, 2H), 3.86 (s, 6H), 3.82 (s, 3H), 3.72 (s, 2H), 1.37 (s, 9H).  $^{13}\text{C NMR}$  (126 MHz, Chloroform-d)  $\delta$  153.2, 137.0, 134.0, 106.0, 60.9, 56.1, 42.9, 33.9, 30.9. HRMS (ESI) calcd for  $\text{C}_{14}\text{H}_{22}\text{NaO}_3\text{S}$   $[\text{M}+\text{Na}]^+$  293.1182 found 293.1180.

#### Synthesis of (1-(butylthio)ethyl)benzene (**3av**)<sup>18</sup>

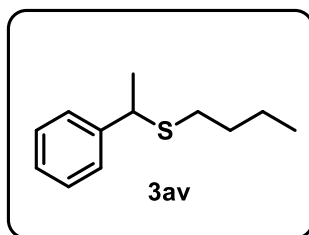

**General procedure 2** was used to prepared compound **3av** from **1e** (51.5 mg, 0.15 mmol). Flash column chromatography was used to refine the crude product to get **3av** (22 mg, 80%) as a colourless oil,  $R_f = 0.8$  (Hexane/EtOAc, 9:1, v/v).  $^1\text{H NMR}$  (400 MHz, Chloroform-d)  $\delta$  7.40 – 7.18 (m, 5H), 3.94 (q,  $J = 7.0$  Hz, 1H), 2.39 – 2.22 (m, 2H), 1.56 (d,  $J = 7.3$  Hz, 3H), 1.51 – 1.45 (m, 2H), 1.39 – 1.29 (m, 2H), 0.84 (t,  $J = 7.3$  Hz, 3H).  $^{13}\text{C NMR}$  (101 MHz, Chloroform-d)  $\delta$  144.2, 128.4, 127.2, 126.9, 44.0, 31.4, 31.0, 22.6, 22.0, 13.7.

#### Synthesis of (1-(phenylthio)ethyl)benzene (**3aw**)<sup>8</sup>

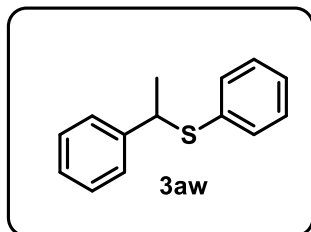

**General procedure 2** was used to prepared compound **2ae** from **1e** (54.1 mg, 0.15 mmol). Flash column chromatography was used to refine the crude product to get **3aw** (27.17 mg, 84%) as a white solid,  $R_f = 0.75$  (Hexane/EtOAc, 9:1, v/v).  $^1\text{H NMR}$  (500 MHz, Chloroform-d)  $\delta$  7.33 – 7.16 (m, 10H), 4.33 (q,  $J = 7.0$  Hz, 1H), 1.63 (d,  $J = 7.0$  Hz, 3H).  $^{13}\text{C NMR}$  (126 MHz, Chloroform-d)  $\delta$  143.3, 137.0, 135.2, 132.5, 128.7, 128.4, 127.3, 127.1, 48.0, 22.3.

#### Synthesis of (1-(adamantanythio)ethyl)benzene (**3ax**)<sup>19</sup>

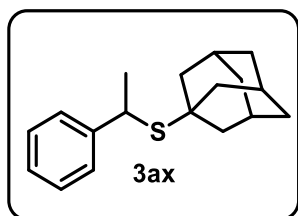

**General procedure 2** was used to prepared compound **3ax** from **1e** (51.8 mg, 0.15 mmol). Flash column chromatography was used to refine the crude product to get **3ax** (32 mg, 81%) as a white solid,  $R_f = 0.8$  (Hexane/EtOAc, 9:1, v/v).  $^1\text{H NMR}$  (500 MHz, Chloroform-d)  $\delta$  7.40 – 7.15 (m, 5H), 4.11 (q,  $J = 7.2$  Hz, 1H), 2.02 – 1.94 (m, 3H), 1.86 – 1.73 (m, 6H), 1.63 (q,  $J = 12.2$  Hz, 6H), 1.55 (d,  $J = 7.0$  Hz, 3H).  $^{13}\text{C NMR}$  (126 MHz, Chloroform-d)  $\delta$  146.9, 128.4, 127.0, 126.5, 46.2, 43.9, 40.0, 36.3, 29.8, 25.8.

#### Synthesis of 1-(tert-butylthio)ethyl)benzene (**3ay**)<sup>20</sup>

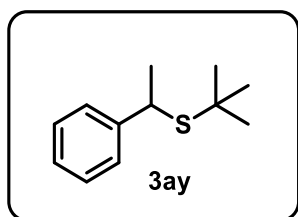

**General procedure 2** was used to prepared compound **3ay** from **1e** (53.2mg, 0.15 mmol). Flash column chromatography was used to refine the crude product to **3ay** (23.1 mg, 80%) as a colourless oil,  $R_f = 0.85$  (Hexane/EtOAc, 9:1, v/v).  $^1\text{H NMR}$  (400 MHz, Chloroform-d)  $\delta$  7.47 – 7.08 (m, 5H), 4.03 (q,  $J = 7.2$  Hz, 1H), 1.56 (d,  $J = 7.2$  Hz, 3H), 1.22 (s, 9H).  $^{13}\text{C NMR}$  (101 MHz, Chloroform-d)  $\delta$  146.5, 128.4, 127.1, 126.6, 43.8, 42.4, 31.4, 25.4.

#### Synthesis of 3-(butylthio)-cholest-5-ene (**3az**)

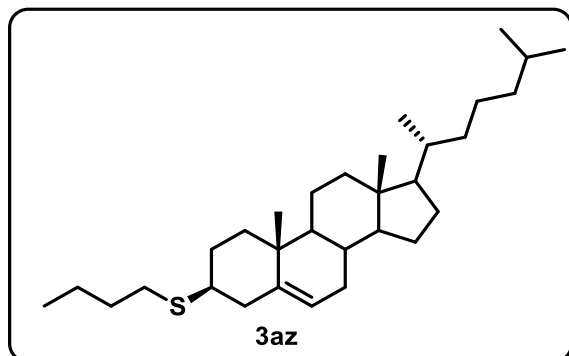

**General procedure 2** was used to prepared compound **3az** from **1f** (51.5 mg, 0.1 mmol). Flash column chromatography was used to refine the crude product to get **3az** (32.4mg, 88%) as a colourless oil,  $R_f = 0.75$  (Hexane/EtOAc, 9:1, v/v).  $^1\text{H NMR}$  (500 MHz, Chloroform-d)  $\delta$  5.33 (d,  $J = 5.3$  Hz, 1H), 2.55 (q,  $J = 6.2$  Hz, 3H), 2.36 – 2.19 (m, 2H), 2.05 – 1.78 (m, 5H), 1.55 – 1.28 (m, 14H), 1.11 (dtd,  $J = 25.3, 10.5, 6.7$  Hz, 8H), 1.00 (s, 6H), 0.91 (dt,  $J = 7.4, 4.1$  Hz, 6H), 0.86 (dd,  $J = 6.6, 2.3$  Hz, 6H), 0.68 (s, 3H).  $^{13}\text{C NMR}$  (126 MHz, Chloroform-d)  $\delta$  142.1, 120.8, 56.9, 56.2, 50.4, 44.5, 42.4, 40.2, 39.8, 39.7, 39.6, 37.0, 36.2, 35.8, 32.2, 32.0, 31.9, 29.9, 29.8, 28.3, 28.0, 24.3, 23.9, 22.8, 22.6, 22.1, 21, 19.4, 18.8, 13.7, 11.9. **HRMS** (ESI) calcd for  $\text{C}_{31}\text{H}_{54}\text{NaS}$   $[\text{M}+\text{Na}]^+$  481.3838 found 481.3817.

#### Synthesis of 1-(phenylthio)-cholest-5-ene (**3ba**)<sup>21</sup>

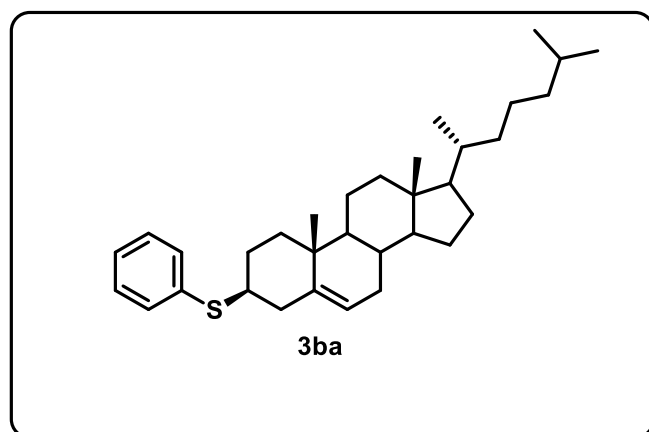

**General procedure 2** was used to prepared compound **3ba** from **1f** (51.5 mg, 0.1 mmol). Flash column chromatography was used to refine the crude product to get **3ba** (32.4mg, 88%) as a white solid,  $R_f = 0.8$  (Hexane/EtOAc, 9:1, v/v).  $^1\text{H NMR}$  (600 MHz, Chloroform-d)  $\delta$  7.39

(d,  $J = 8.4$  Hz, 2H), 7.28 (t,  $J = 7.6$  Hz, 2H), 7.21 (t,  $J = 7.4$  Hz, 1H), 5.32 – 5.28 (m, 1H), 3.02 (dtd,  $J = 12.2, 8.2, 3.4$  Hz, 1H), 2.31 (d,  $J = 8.1$  Hz, 2H), 2.03 – 1.82 (m, 5H), 1.56 – 1.28 (m, 11H), 1.19 – 1.04 (m, 8H), 0.99 (s, 3H), 0.91 (d,  $J = 6.6$  Hz, 3H), 0.87 (d,  $J = 2.7$  Hz, 3H), 0.86 (d,  $J = 2.6$  Hz, 3H), 0.67 (s, 3H).  $^{13}\text{C}$  NMR (151 MHz, Chloroform-d)  $\delta$  141.7, 134.9, 131.8, 128.8, 126.6, 121.2, 56.8, 56.2, 50.3, 47.4, 42.3, 39.8, 39.6, 39.5, 36.9, 36.2, 35.8, 31.9, 31.8, 29.5, 28.2, 28.0, 24.3, 23.8, 22.8, 22.6, 20.9, 19.4, 18.7, 11.9.

#### Synthesis of 3-(4-methoxyphenyl)-3-methylisobenzofuran-1-one (**1h**)<sup>1</sup>

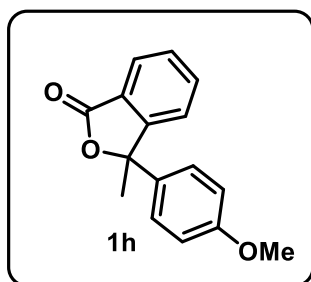

Compound **1h** was isolated via flash column chromatography as a colourless oil.  $^1\text{H}$  NMR (500 MHz, Chloroform-d)  $\delta$  7.83 (d,  $J = 7.7$  Hz, 1H), 7.61 – 7.55 (m, 1H), 7.44 (t,  $J = 7.5$  Hz, 1H), 7.35 (d,  $J = 7.7$  Hz, 1H), 7.29 – 7.23 (m, 2H), 6.82 – 6.76 (m, 2H), 3.71 (s, 3H), 1.95 (s, 3H).

#### Synthesis of 3-(4-methoxyphenethyl)-3-(4-methoxyphenyl)isobenzofuran-1-one (**1i**)

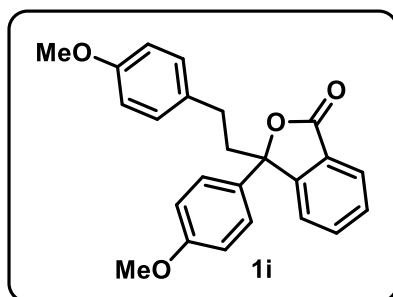

**General procedure 2** was used to prepared compound **1i** from **1a** (52.8 mg, 0.14 mmol) without using any nucleophile. flash column chromatography was used to refine the crude product to get **1i** (24 mg, 45 %) as a colourless oil,  $R_f = 0.45$  (Hexane/EtOAc, 9:1, v/v).  $^1\text{H}$  NMR (600 MHz, Chloroform-d)  $\delta$  7.91 (d,  $J = 7.6$  Hz, 1H), 7.66 (t,  $J = 7.5$  Hz, 1H), 7.54 – 7.47 (m, 2H), 7.46 – 7.40 (m, 2H), 7.02 – 6.97 (m, 2H), 6.92 – 6.86 (m, 2H), 6.80 – 6.75 (m, 2H), 3.79 (s, 3H), 3.76 (s, 3H), 2.73 (ddd,  $J = 14.1, 12.3, 4.3$  Hz, 1H), 2.55 (td,  $J = 12.9, 4.3$  Hz, 1H), 2.43 (ddd,  $J = 14.1, 12.1, 4.5$  Hz, 1H), 2.34 (td,  $J = 12.9, 4.5$  Hz, 1H).  $^{13}\text{C}$  NMR (151 MHz, Chloroform-d)  $\delta$  170.2, 159.4, 157.9, 153.0, 134.3, 133.0, 132.2, 129.2, 129.1, 126.4,



126.0, 125.5, 122.1, 114.1, 113.9, 89.8, 55.3, 55.3, 42.4, 29.2. **HRMS (ESI)** calcd for C<sub>24</sub>H<sub>23</sub>O<sub>4</sub> [M+H]<sup>+</sup> 375.1591 found 375.1589.

## References

- (1) Halder, S.; Addanki, R. B.; Moktan, S.; Kancharla, P. K. Glycosyl O-[1-(p-MeO-Phenyl)Vinyl]Benzoates (PMPVB) as Easily Accessible, Stable, and Reactive Glycosyl Donors for O-, S-, and C-Glycosylations under Brønsted Acid Catalysis. *J. Org. Chem.* 2022, **87** (11), 7033–7055.
- (2) Zhang, L.; Gonzalez-de-Castro, A.; Chen, C.; Li, F.; Xi, S.; Xu, L.; Xiao, J. Iron-Catalyzed Cross Etherification of Alcohols to Form Unsymmetrical Benzyl Ethers. *Mol. Catal.* 2017, **433**, 62–67.
- (3) Ma, X.; Dang, H.; Rose, J. A.; Rablen, P.; Herzon, S. B. Hydroheteroarylation of Unactivated Alkenes Using N-Methoxyheteroarenium Salts. *J. Am. Chem. Soc.* 2017, **139** (16), 5998–6007.
- (4) Kim, J.; Lee, D.-H.; Kalutharage, N.; Yi, C. S. Selective Catalytic Synthesis of Unsymmetrical Ethers from the Dehydrative Etherification of Two Different Alcohols. *ACS Catal.* 2014, **4** (11), 3881–3885.
- (5) Shen, Z.; Dai, J.; Xiong, J.; He, X.; Mo, W.; Hu, B.; Sun, N.; Hu, X. 2,3-Dichloro-5,6-Dicyano-1,4-Benzoquinone (DDQ)/Tert-Butyl Nitrite/Oxygen: A Versatile Catalytic Oxidation System. *Adv. Synth. Catal.* 2011, **353** (16), 3031–3038.
- (6) Kharrngi, B.; Basumatary, G.; Bez, G. Iodine Catalysed Synthesis of Unsymmetrical Benzylic Ethers by Direct Cross-Coupling of Alcohols. *Tetrahedron Lett.* 2021, **81**, 153370.
- (7) O'Brya, G.; Braslau, R. Terminal Functionalization of Polymers via Single Electron Oxidation of N-Alkoxyamines. *Macromolecules* 2006, **39** (26), 9010–9017.
- (8) Lomenick, B.; Shi, H.; Huang, J.; Chen, C. Identification and Characterization of  $\beta$ -Sitosterol Target Proteins. *Bioorg. Med. Chem. Lett.* 2015, **25** (21), 4976–4979.
- (9) Paul, S.; Guin, J. A General Approach to Intermolecular Olefin Hydroacylation through Light-Induced HAT Initiation: An Efficient Synthesis of Long-Chain Aliphatic Ketones and Functionalized Fatty Acids. *Chem. – A Eur. J.* 2021, **27** (13), 4412–4419.
- (10) Chand, S.; Pandey, A. K.; Singh, R.; Kumar, S.; Singh, K. N. Eosin-Y-Catalyzed

- Photoredox C–S Bond Formation: Easy Access to Thioethers. *Chem. – An Asian J.* 2019, **14** (24), 4712–4716.
- (11) Pramanik, M.; Choudhuri, K.; Mathuri, A.; Mal, P. Dithioacetalization or Thioetherification of Benzyl Alcohols Using 9-Mesityl-10-Methylacridinium Perchlorate Photocatalyst. *Chem. Commun.* 2020, **56** (70), 10211–10214.
- (12) Wang, Y.; Deng, J.; Chen, J.; Cao, F.; Hou, Y.; Yang, Y.; Deng, X.; Yang, J.; Wu, L.; Shao, X.; Shi, T.; Wang, Z. Dechalcogenization of Aryl Dichalcogenides to Synthesize Aryl Chalcogenides via Copper Catalysis. *ACS Catal.* 2020, **10** (4), 2707–2712.
- (13) Barry, N.; Brondel, N.; Lawrence, S. E.; Maguire, A. R. Synthesis of Aryl Benzyl NH-Sulfoximines. *Tetrahedron* 2009, **65** (51), 10660–10670.
- (14) Sakai, N.; Moritaka, K.; Konakahara, T. A Novel Approach to the Practical Synthesis of Sulfides: An InBr<sub>3</sub>–Et<sub>3</sub>SiH Catalytic System Promoted the Direct Reductive Sulfidation of Acetals with Disulfides. *European J. Org. Chem.* 2009, **2009**(24), 4123–4127.
- (15) Zhou, W.-Y.; Chen, M.; Zhang, P.-Z.; Jia, A.-Q.; Zhang, Q.-F. Methods, Syntheses and Characterization of Diaryl, Aryl Benzyl, and Dibenzyl Sulfides. *J. Chem. Crystallogr.* 2021, **51** (3), 301–310.
- (16) Liu, C.-R.; Li, M.-B.; Yang, C.-F.; Tian, S.-K. Selective Benzylic and Allylic Alkylation of Protic Nucleophiles with Sulfonamides through Double Lewis Acid Catalyzed Cleavage of Sp<sup>3</sup> Carbon–Nitrogen Bonds. *Chem. – A Eur. J.* 2009, **15** (3), 793–797.
- (17) Urriolabeitia, E. P.; Ruiz, S. Ru(Ii)-Catalysed Synthesis of (1H)-Isothiochromenes by Oxidative Coupling of Benzylthioethers with Internal Alkynes. *Org. Biomol. Chem.* 2019, **17** (9), 2542–2547.
- (18) Miller, K. J.; Abu-Omar, M. M. Palladium-Catalyzed SN1 Reactions of Secondary Benzylic Alcohols: Etherification, Amination, and Thioetherification. *European J. Org. Chem.* 2003, **2003** (7), 1294–1299.
- (19) Liu, S.; Jin, S.; Wang, H.; Qi, Z.; Hu, X.; Qian, B.; Huang, H. Nickel-Catalyzed Oxidative Dehydrogenative Coupling of Alkane with Thiol for C(Sp<sup>3</sup>)-S Bond Formation. *Tetrahedron Lett.* 2021, **68**, 152950.
- (20) Dupont, J.; Gruber, A. S.; Fonseca, G. S.; Monteiro, A. L.; Ebeling, G.; Burrow, R. A.

- Synthesis and Catalytic Properties of Configurationally Stable and Non-Racemic Sulfur-Containing Palladacycles. *Organometallics* 2001, **20** (1), 171–176.
- (21) Graßl, S.; Hamze, C.; Koller, T. J.; Knochel, P. Copper-Catalyzed Electrophilic Thiolation of Organozinc Halides by Using N-Thiophthalimides Leading to Polyfunctional Thioethers. *Chem. – A Eur. J.* 2019, **25** (15), 3752–3755.



### <sup>13</sup>C NMR spectrum of compound 1a (126 MHz CDCl<sub>3</sub>)

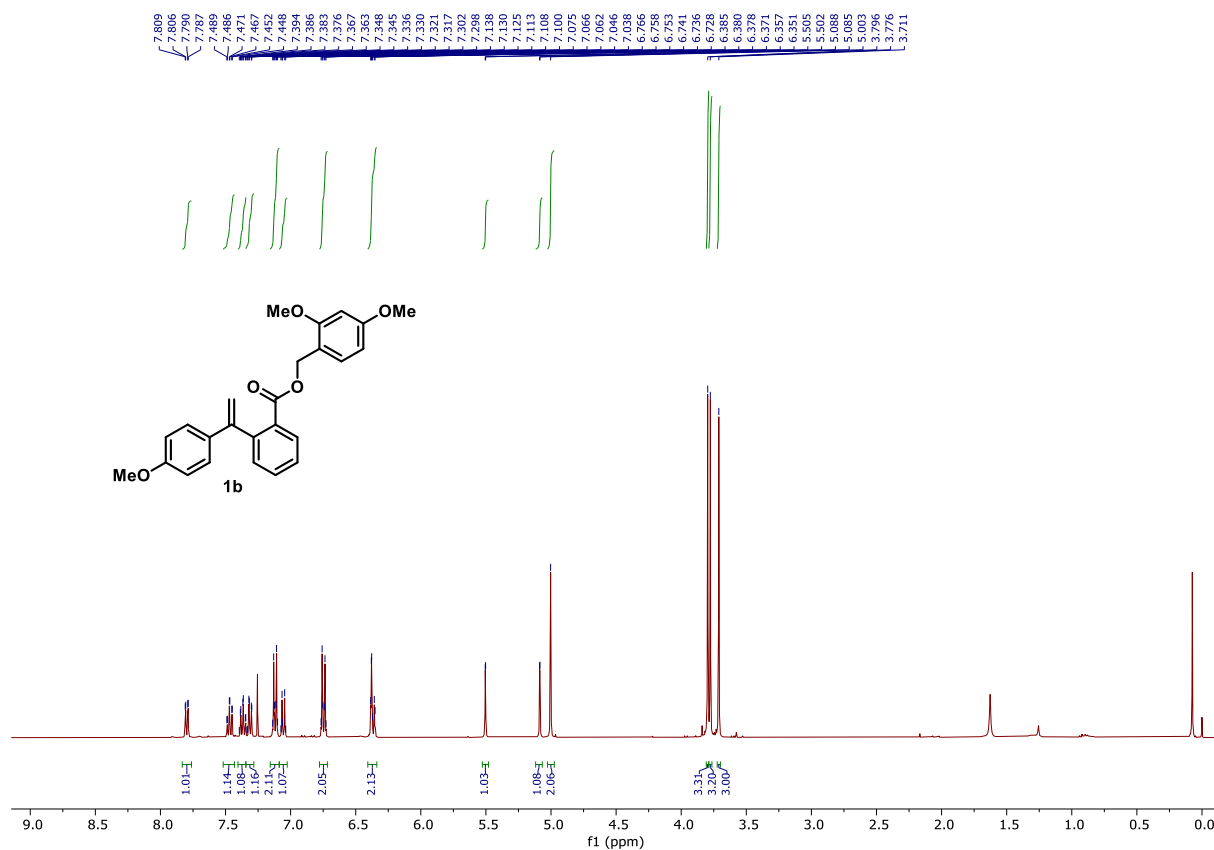

### <sup>1</sup>H NMR spectrum of compound 1b (400 MHz CDCl<sub>3</sub>)

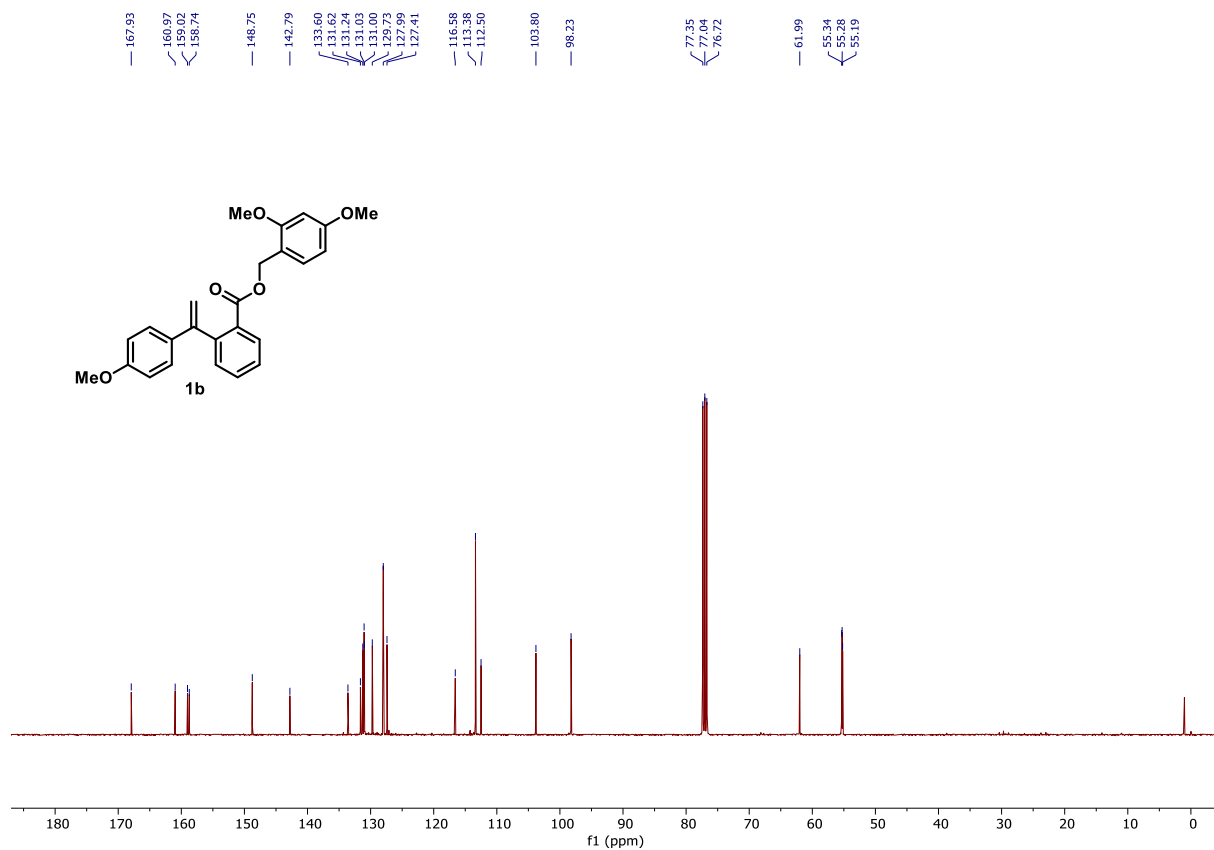



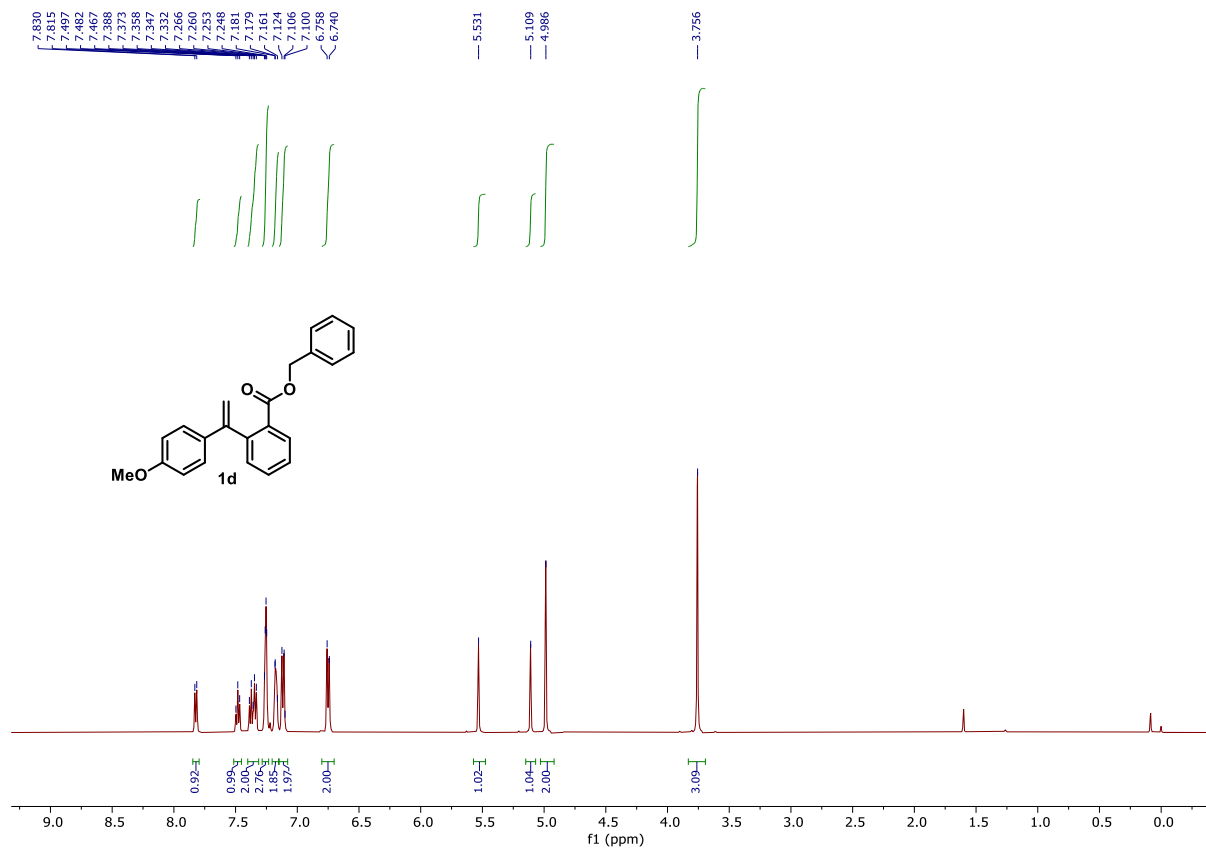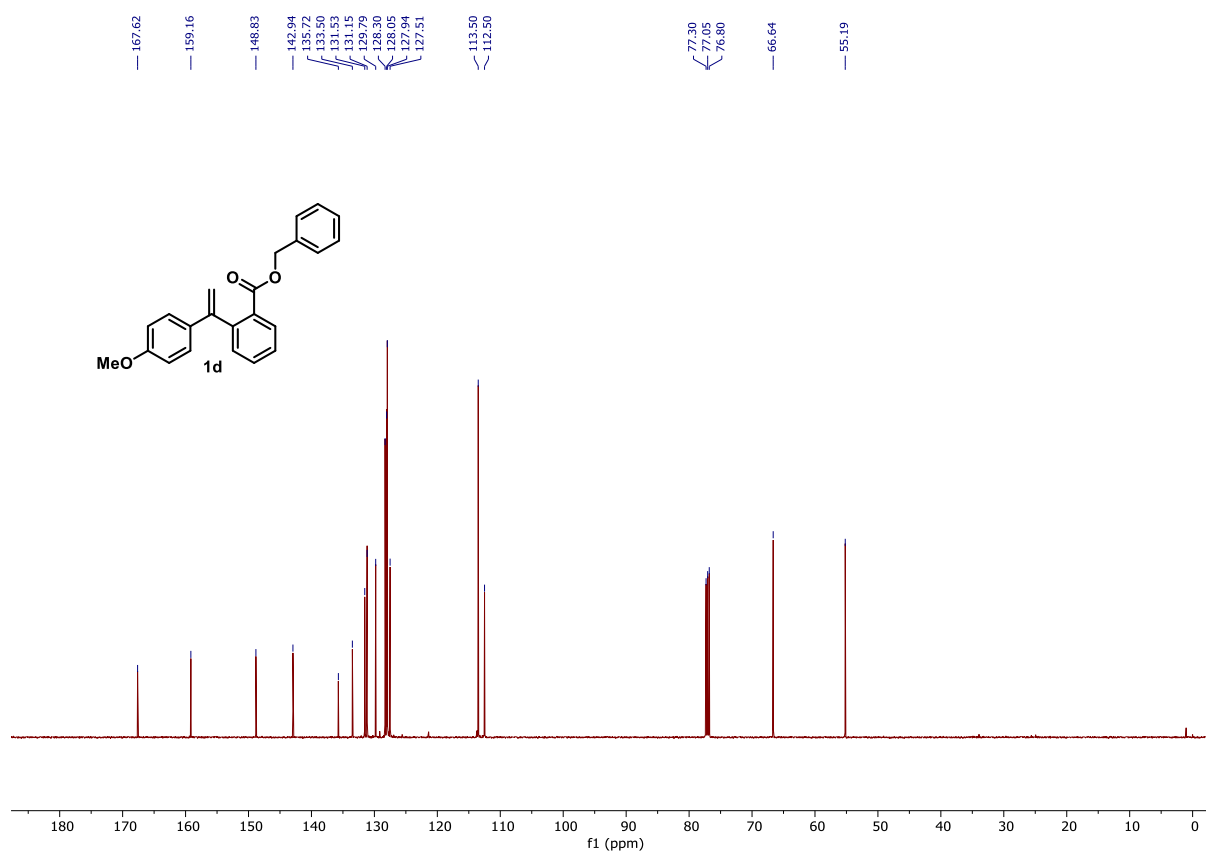

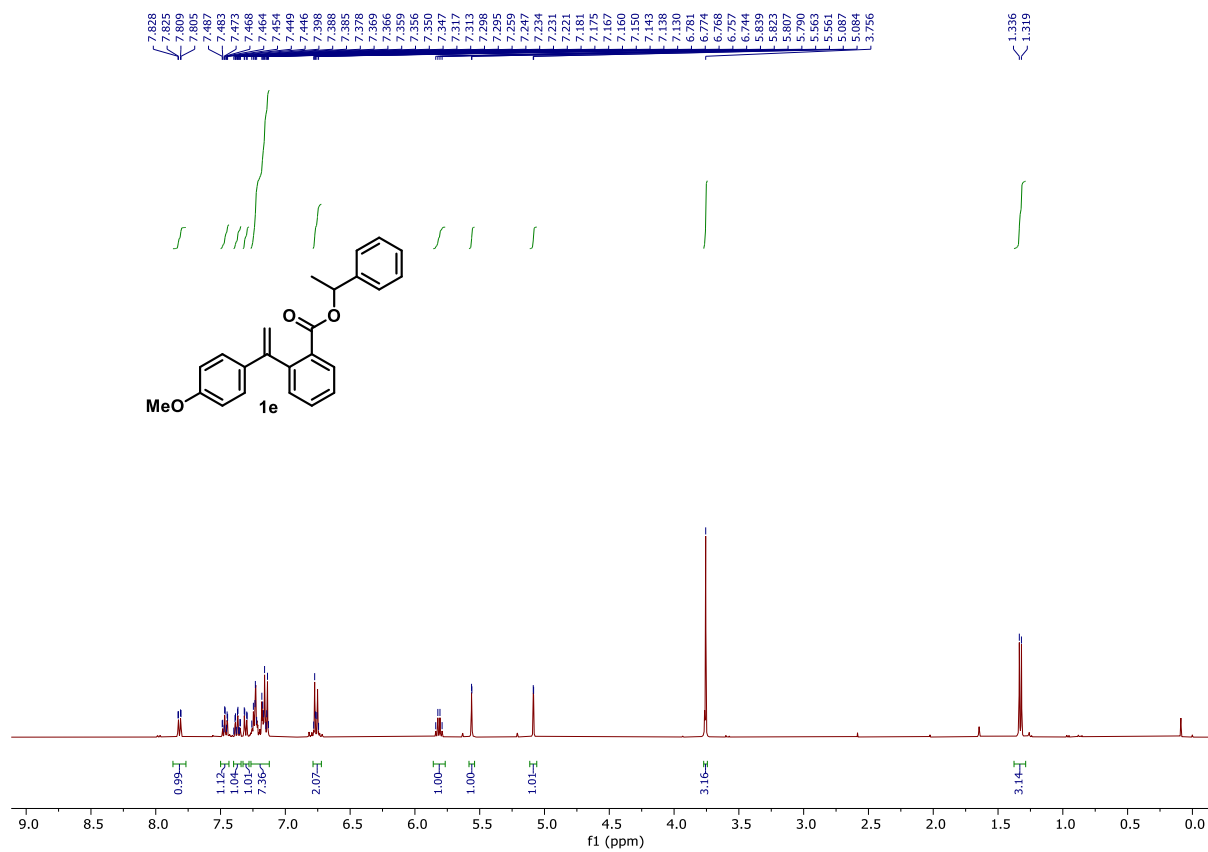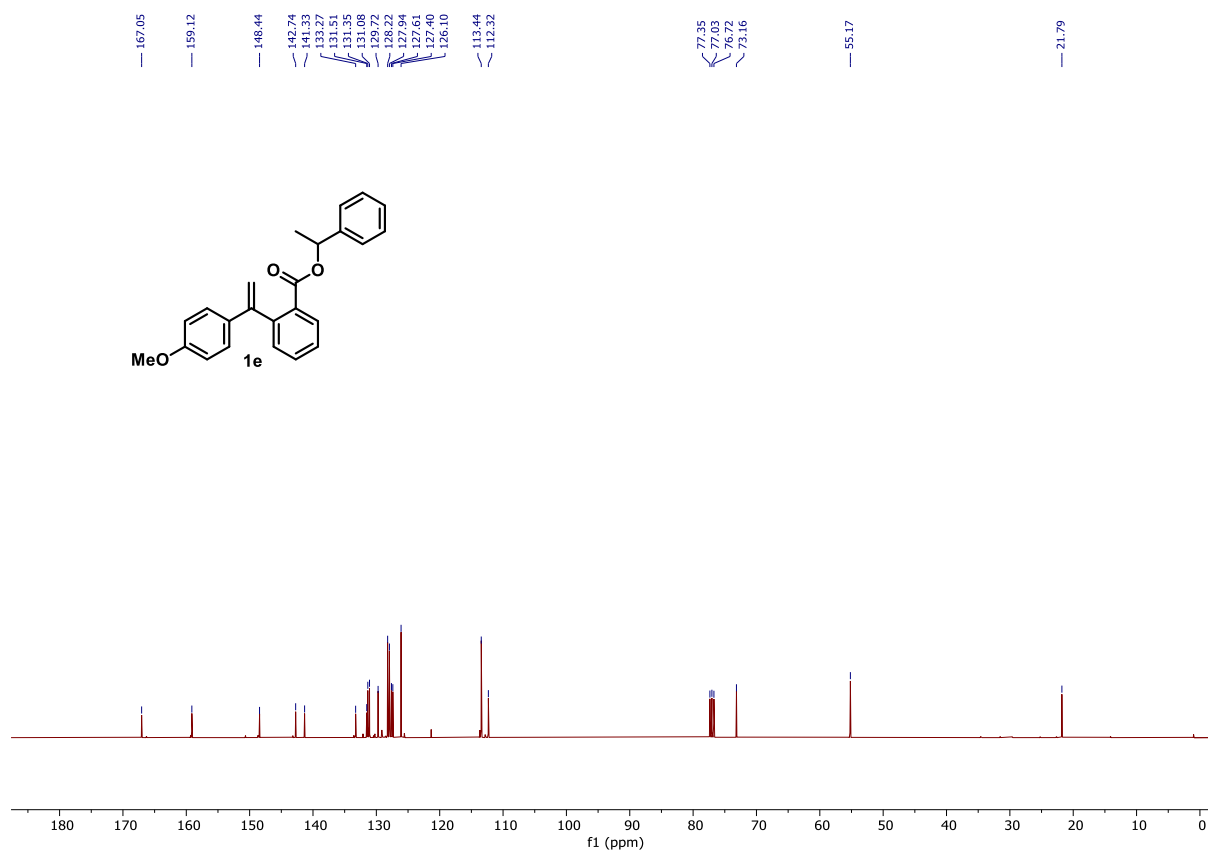





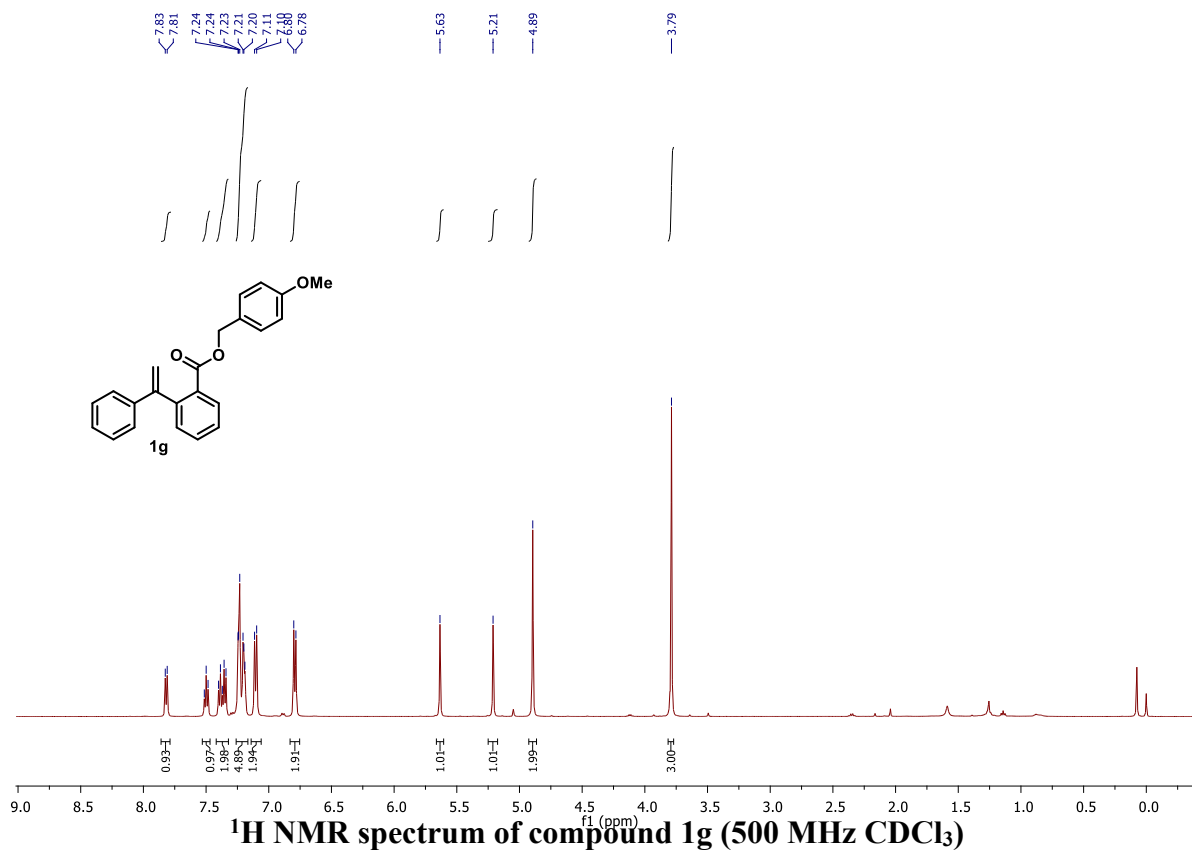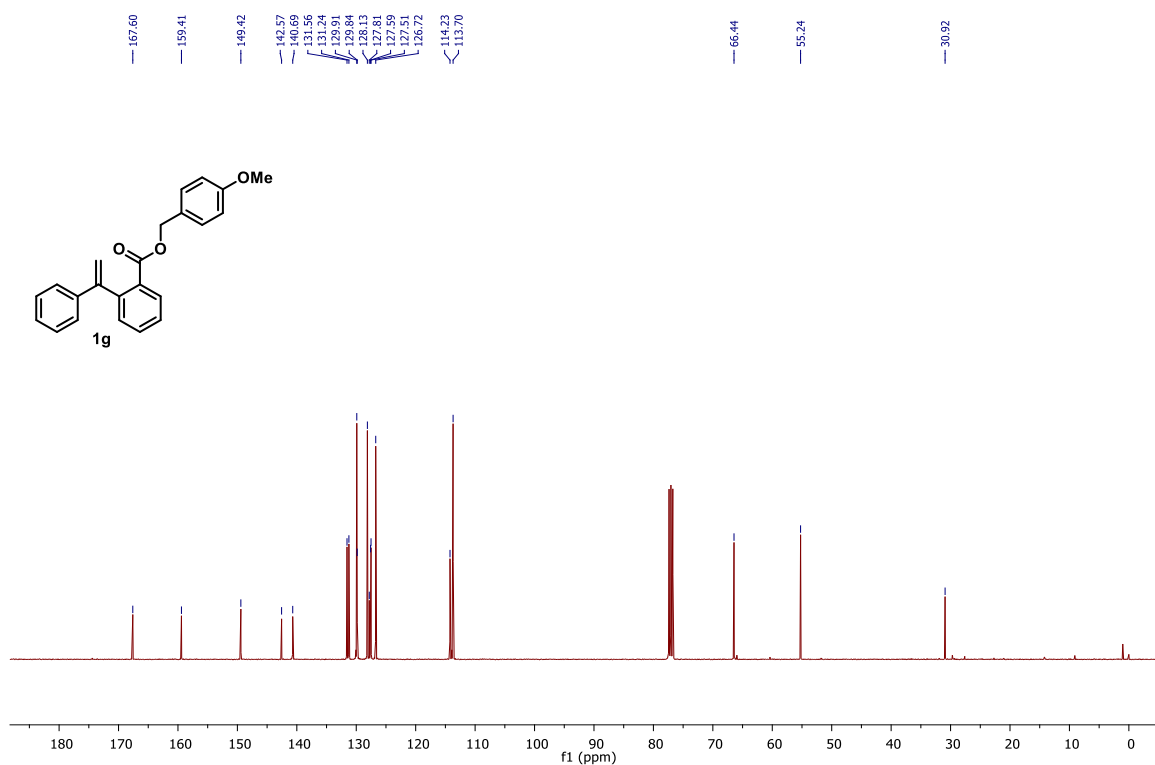

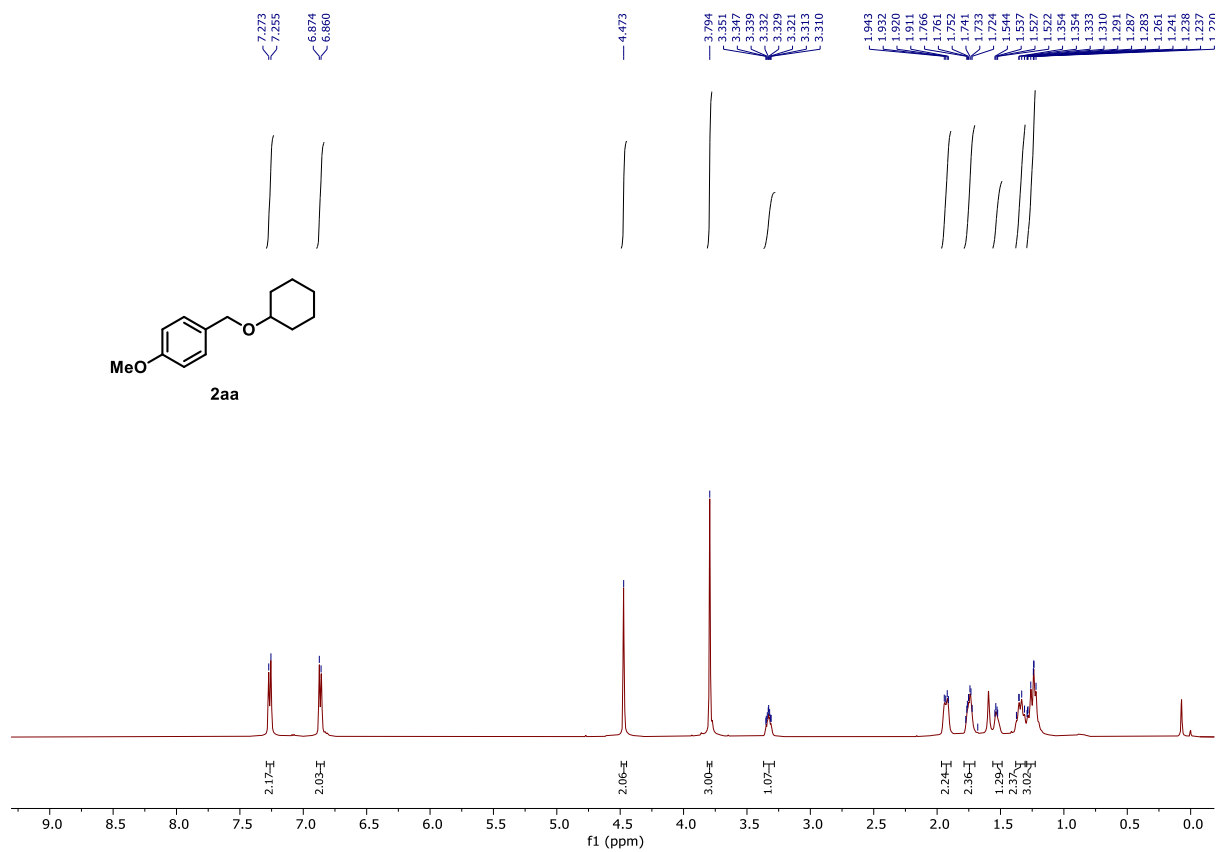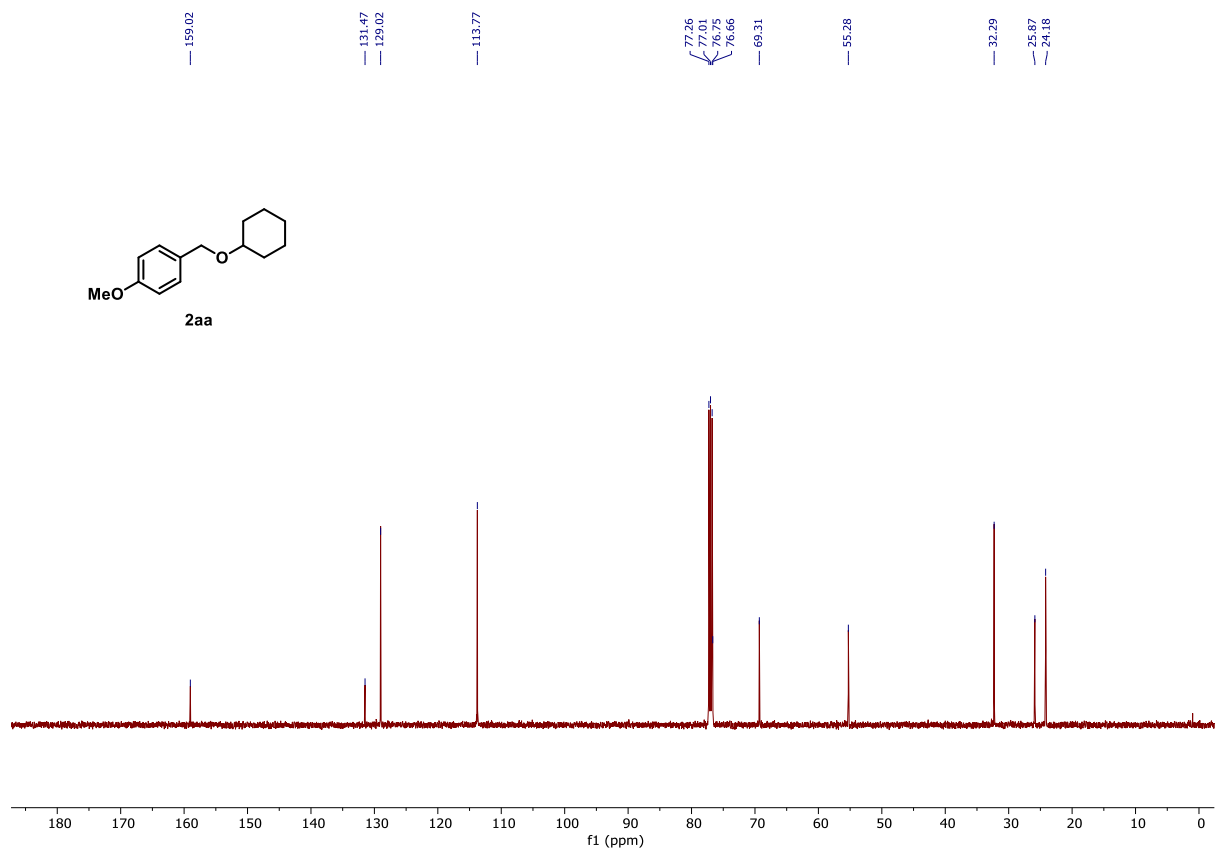

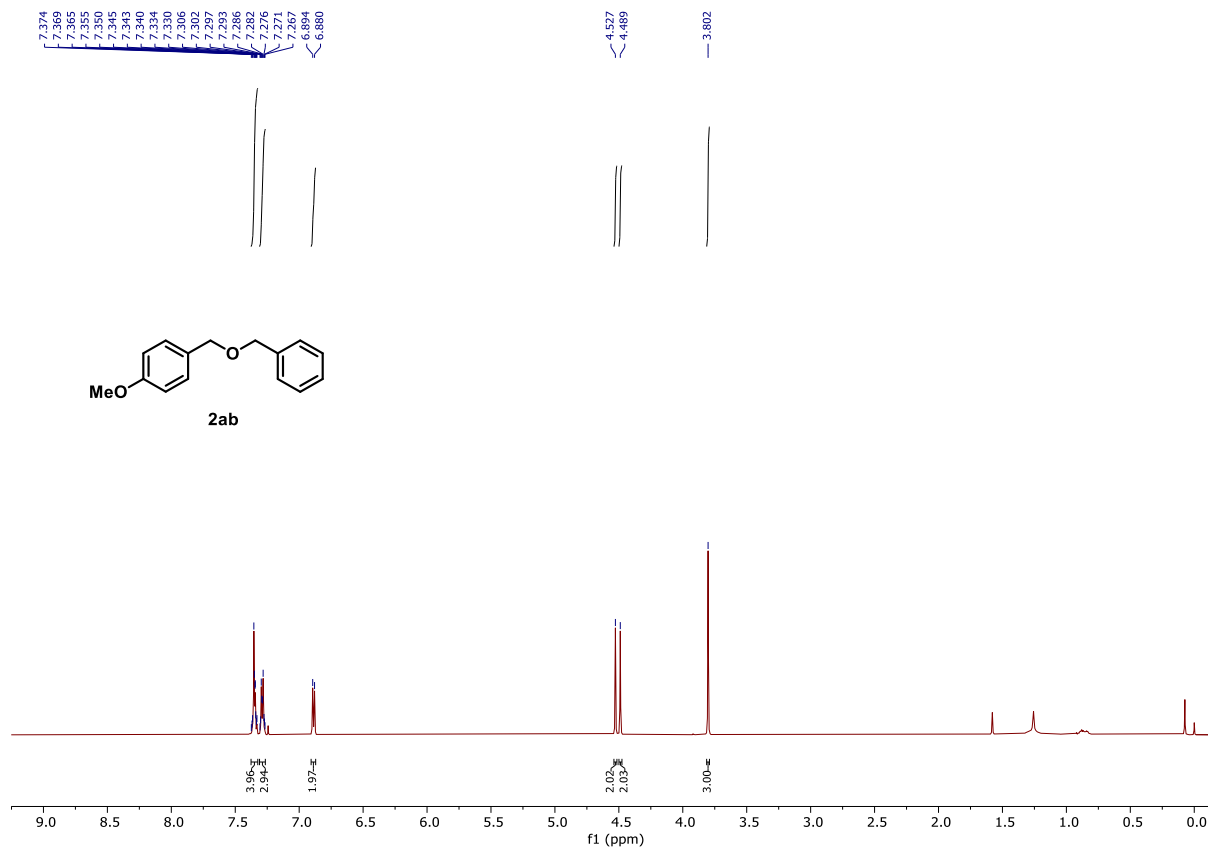

**<sup>1</sup>H NMR spectrum of compound 2ab (600 MHz CDCl<sub>3</sub>)**

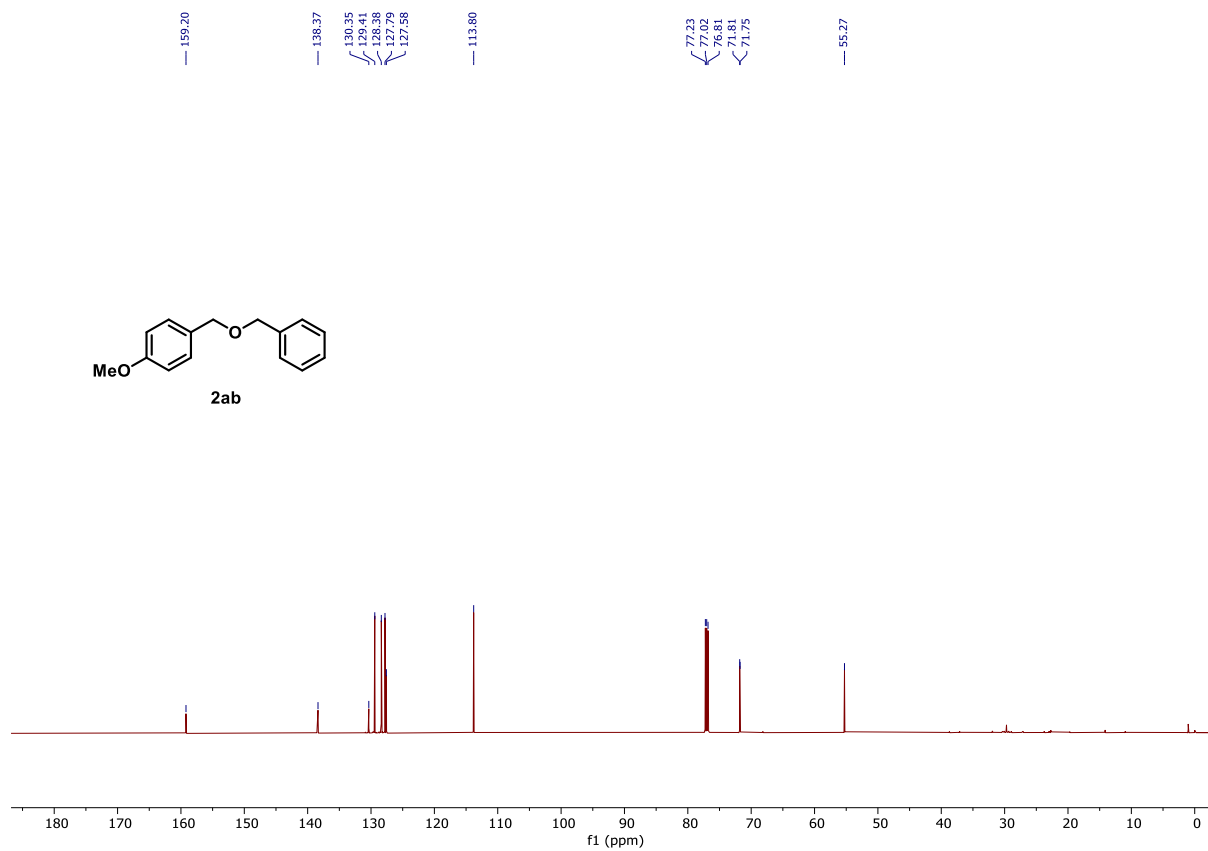

**<sup>13</sup>C NMR spectrum of compound 2ab (151 MHz CDCl<sub>3</sub>)**

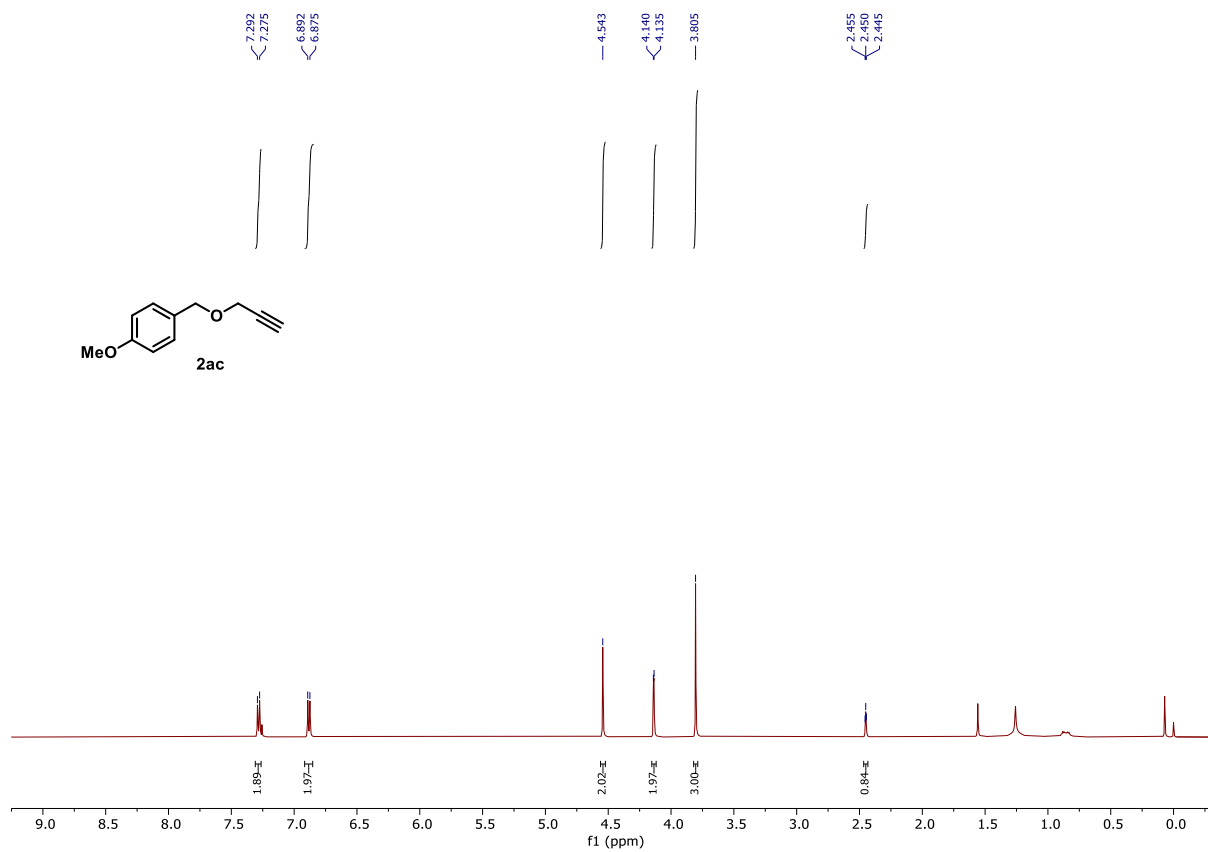

**<sup>1</sup>H NMR spectrum of compound 2ac (500 MHz CDCl<sub>3</sub>)**

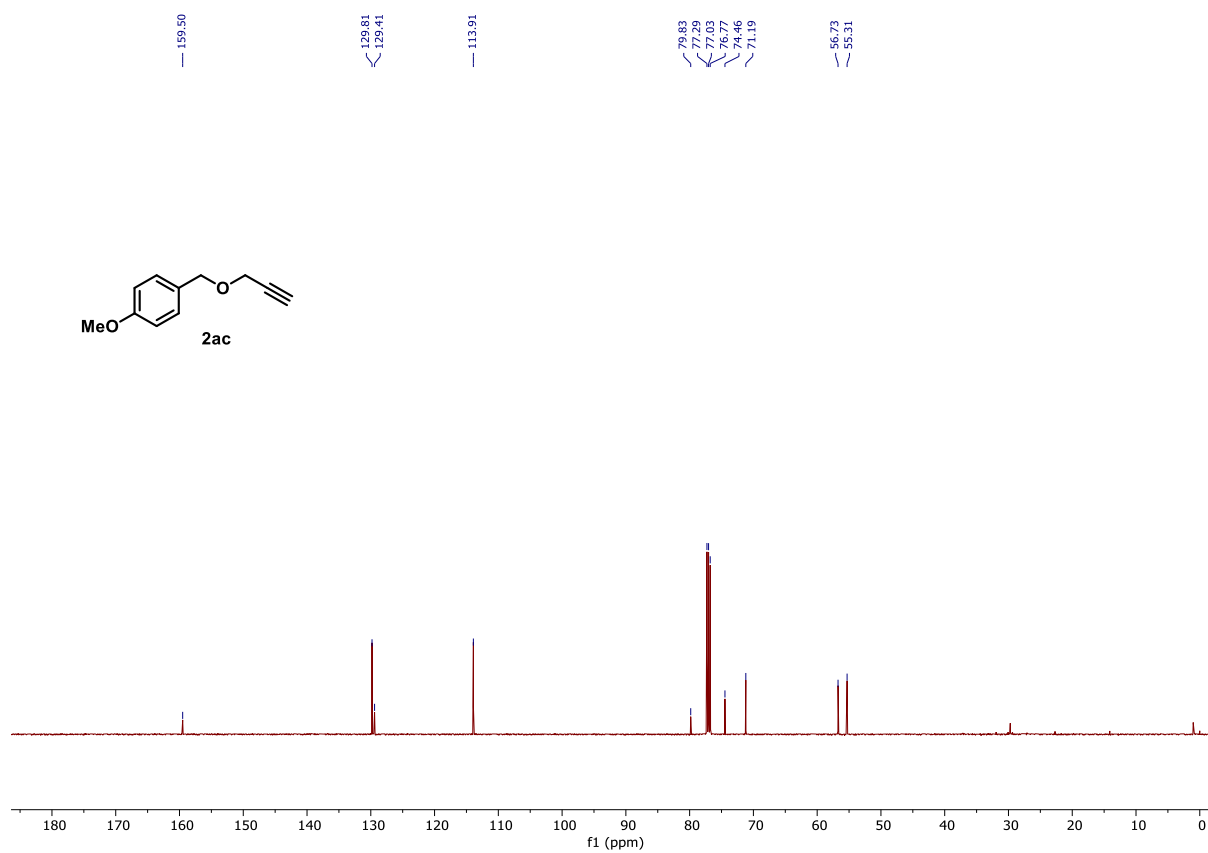

**<sup>13</sup>C NMR spectrum of compound 2ac (126 MHz CDCl<sub>3</sub>)**

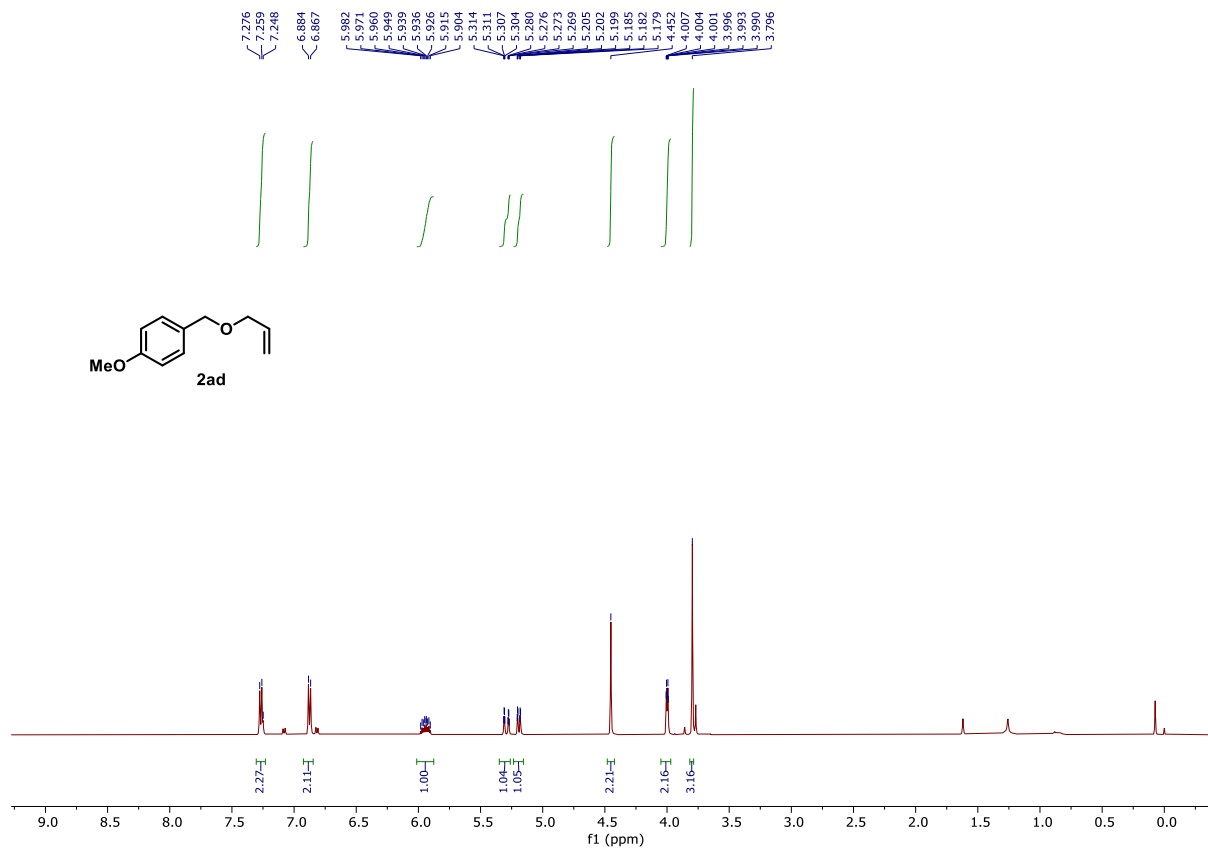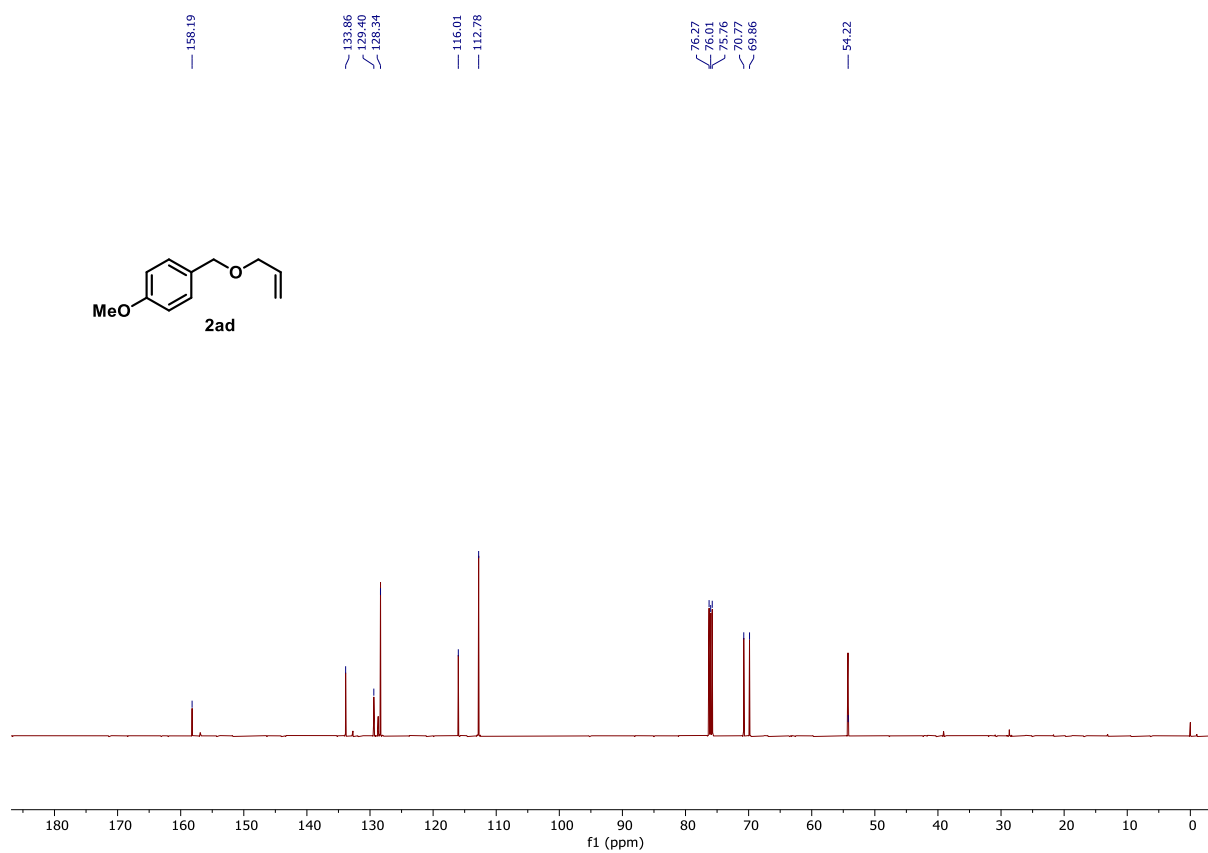

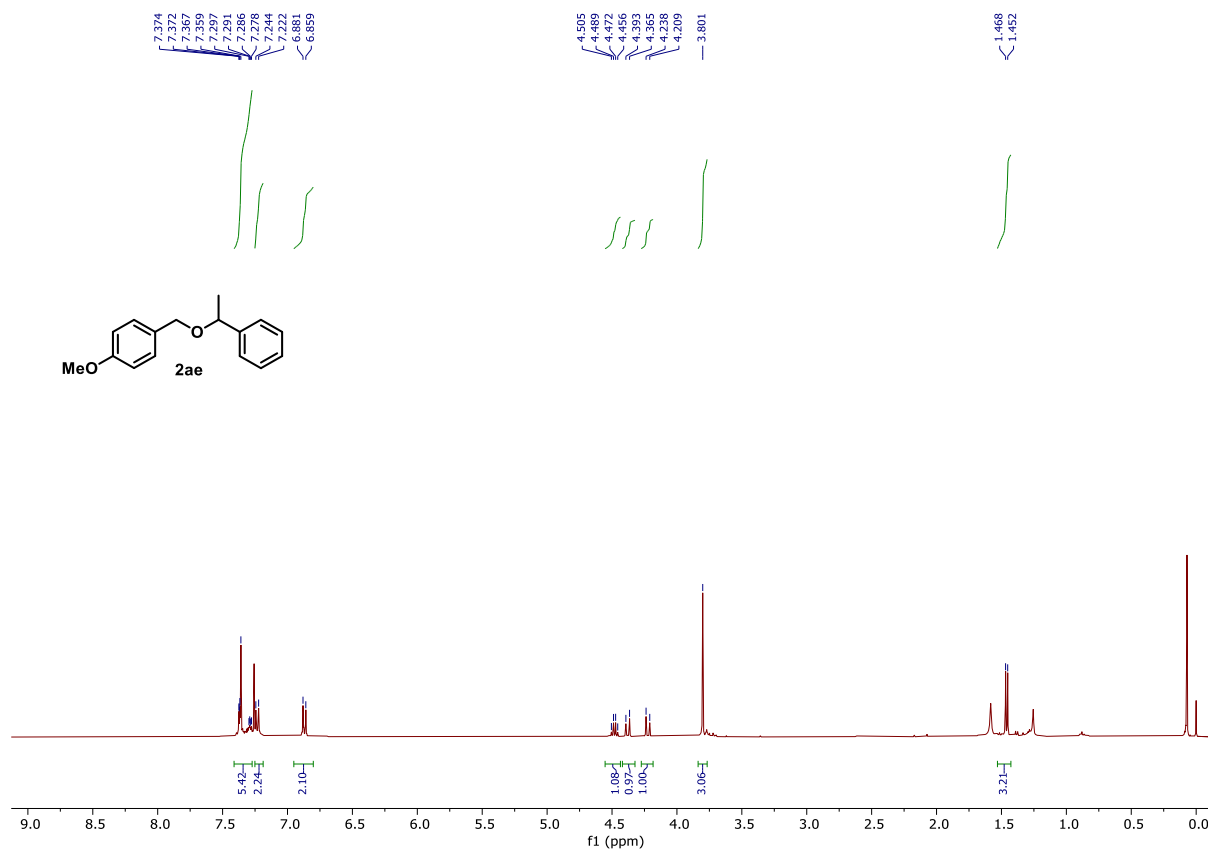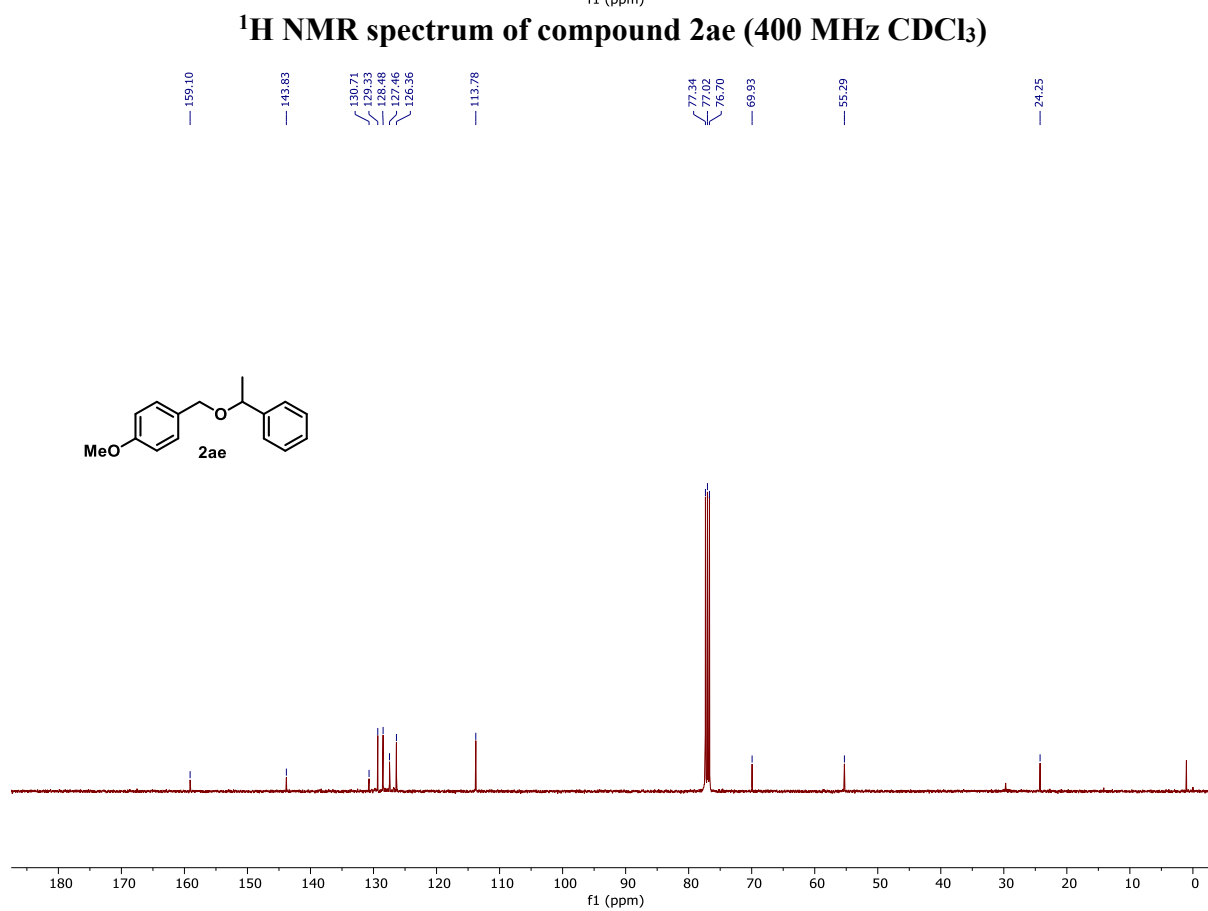

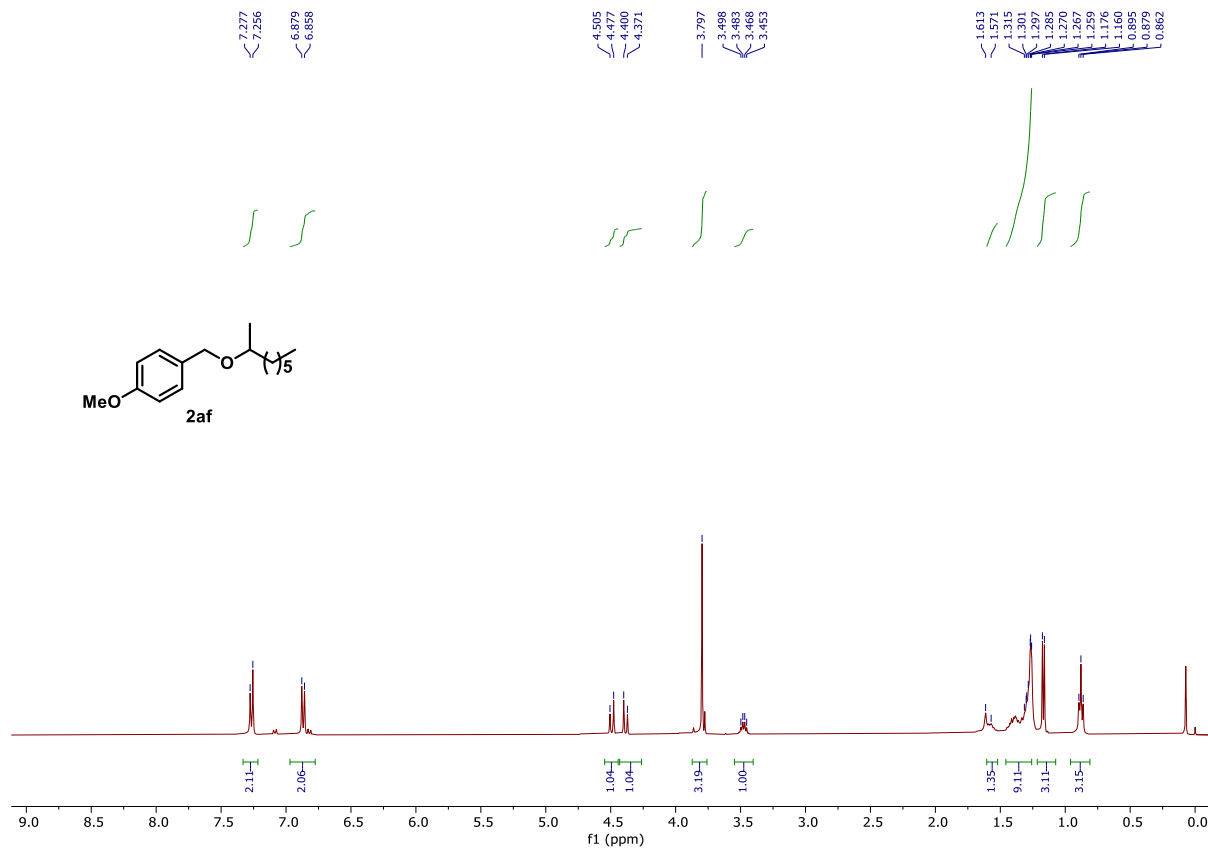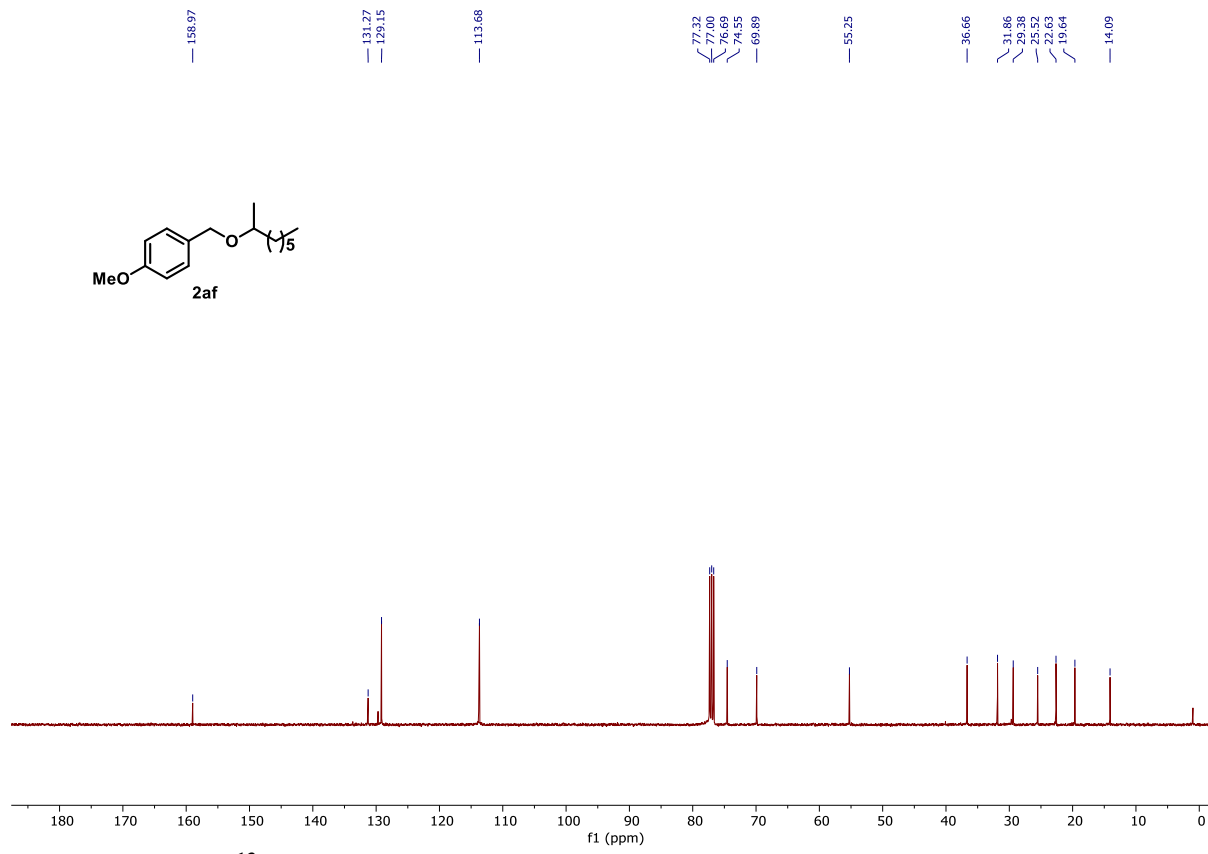



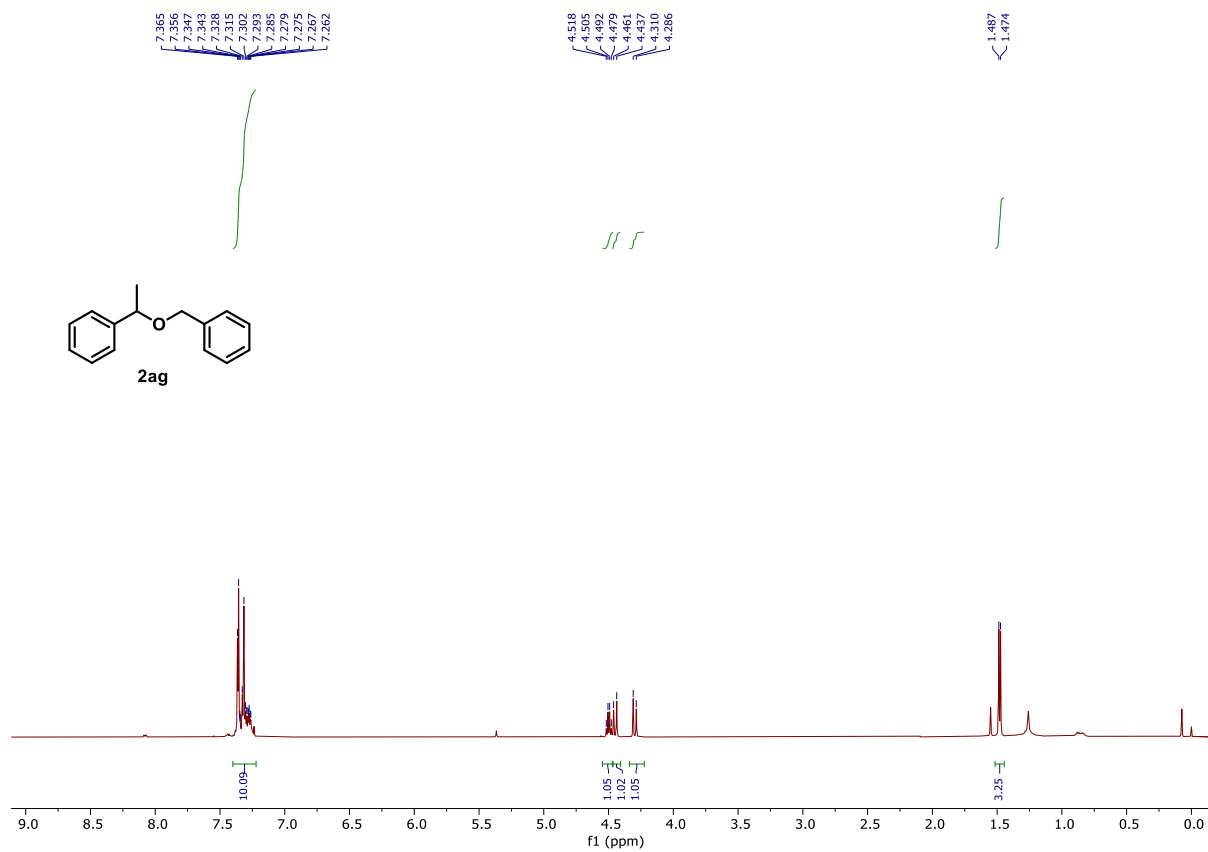

<sup>1</sup>H NMR spectrum of compound 2ag (500 MHz CDCl<sub>3</sub>)

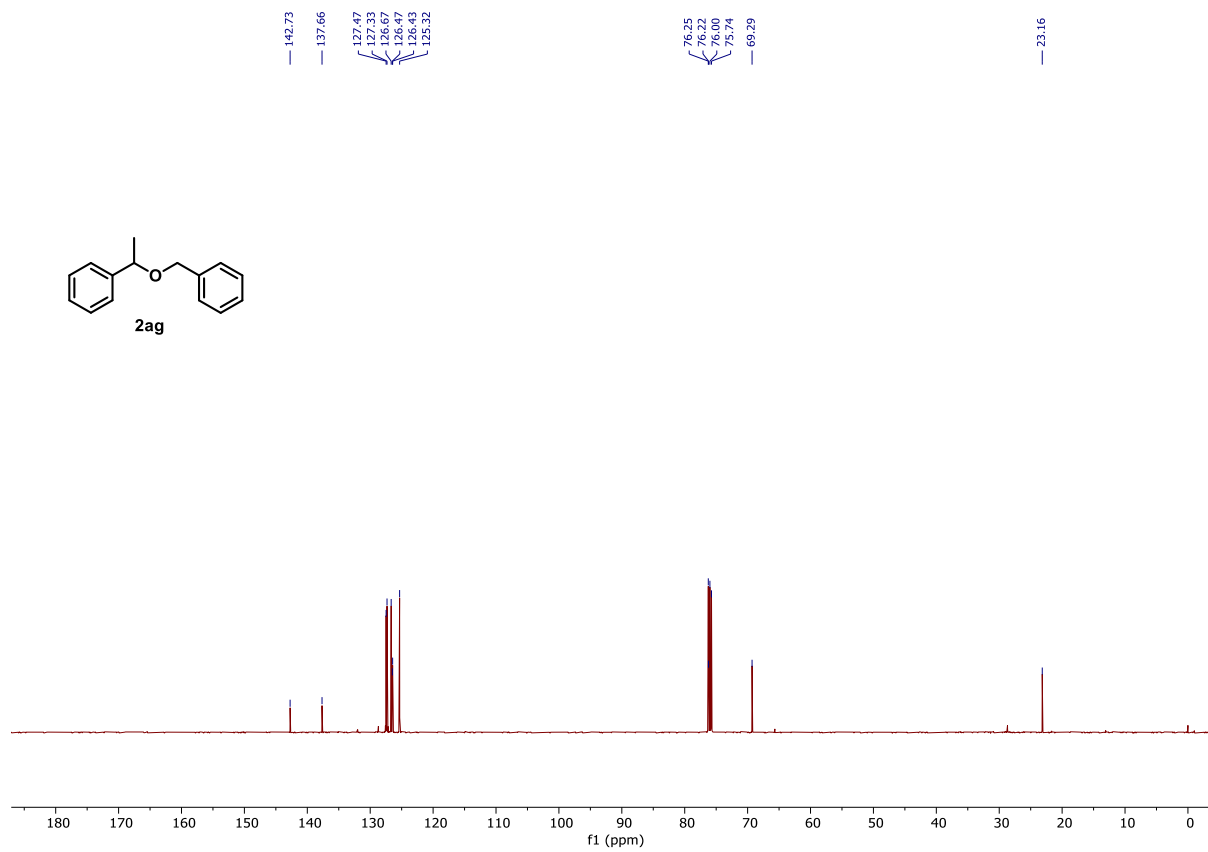

<sup>13</sup>C NMR spectrum of compound 2ag (126 MHz CDCl<sub>3</sub>)

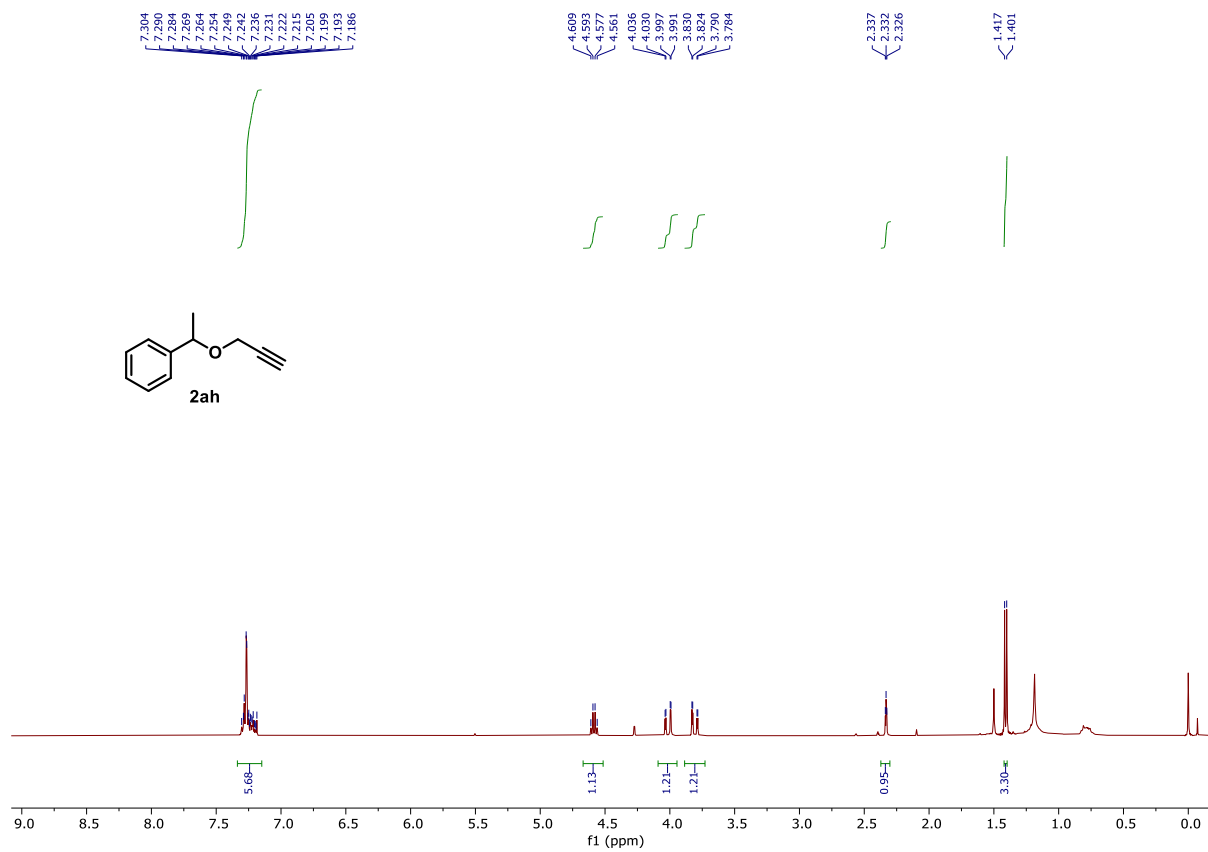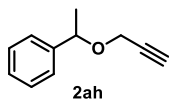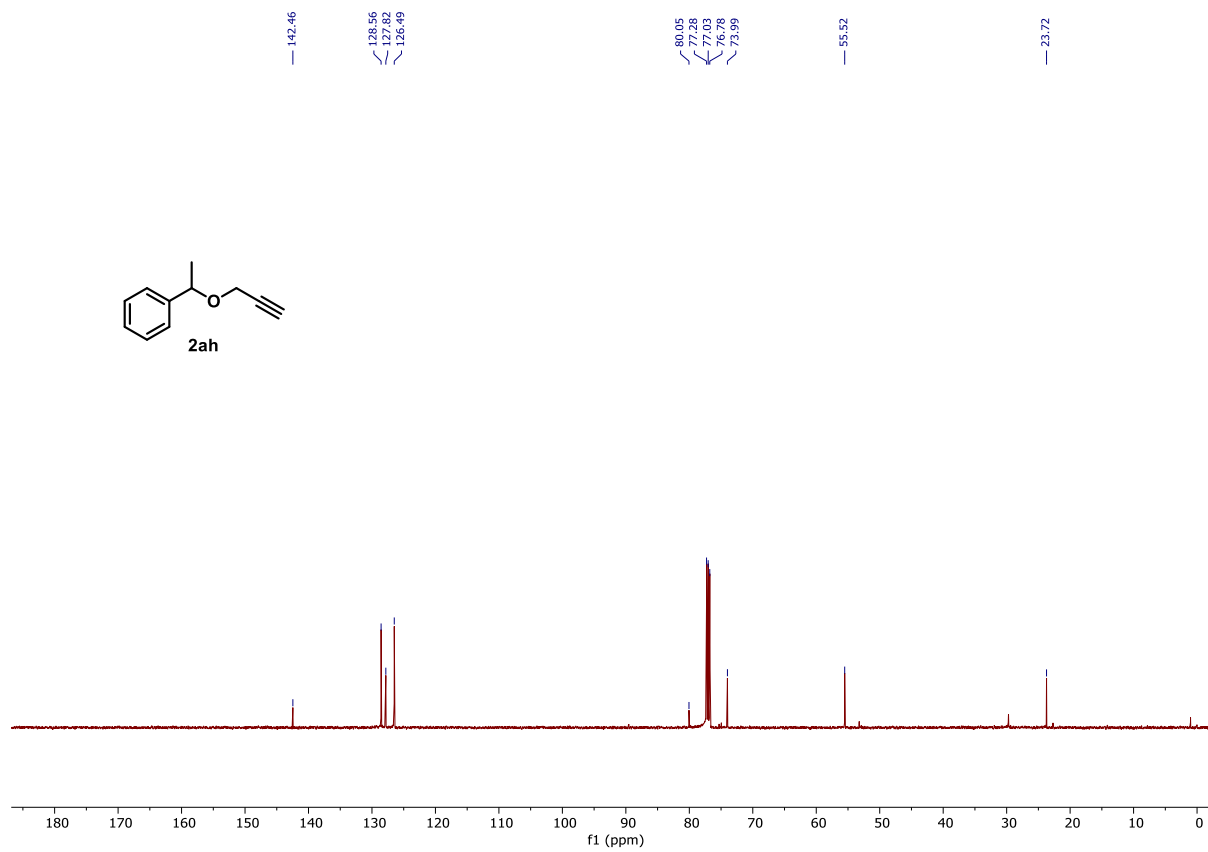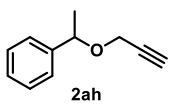

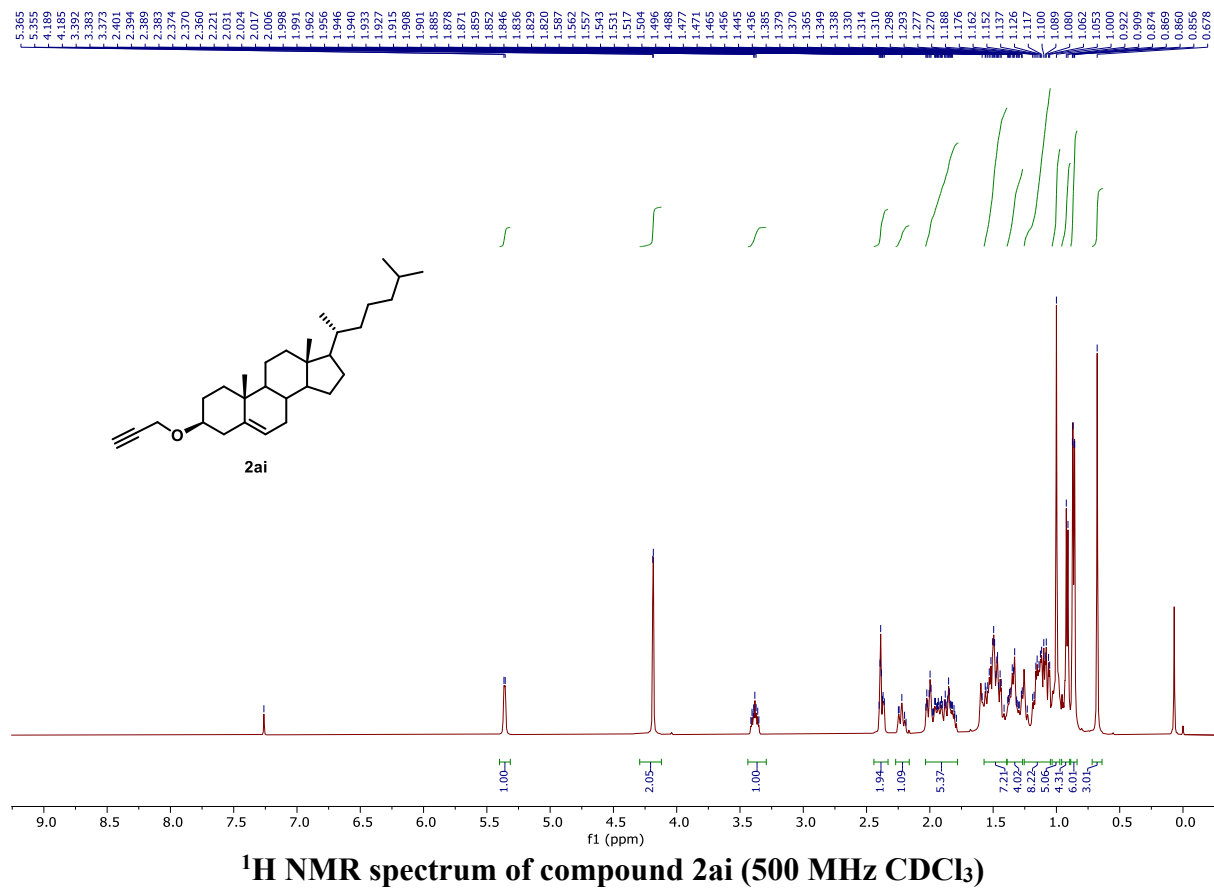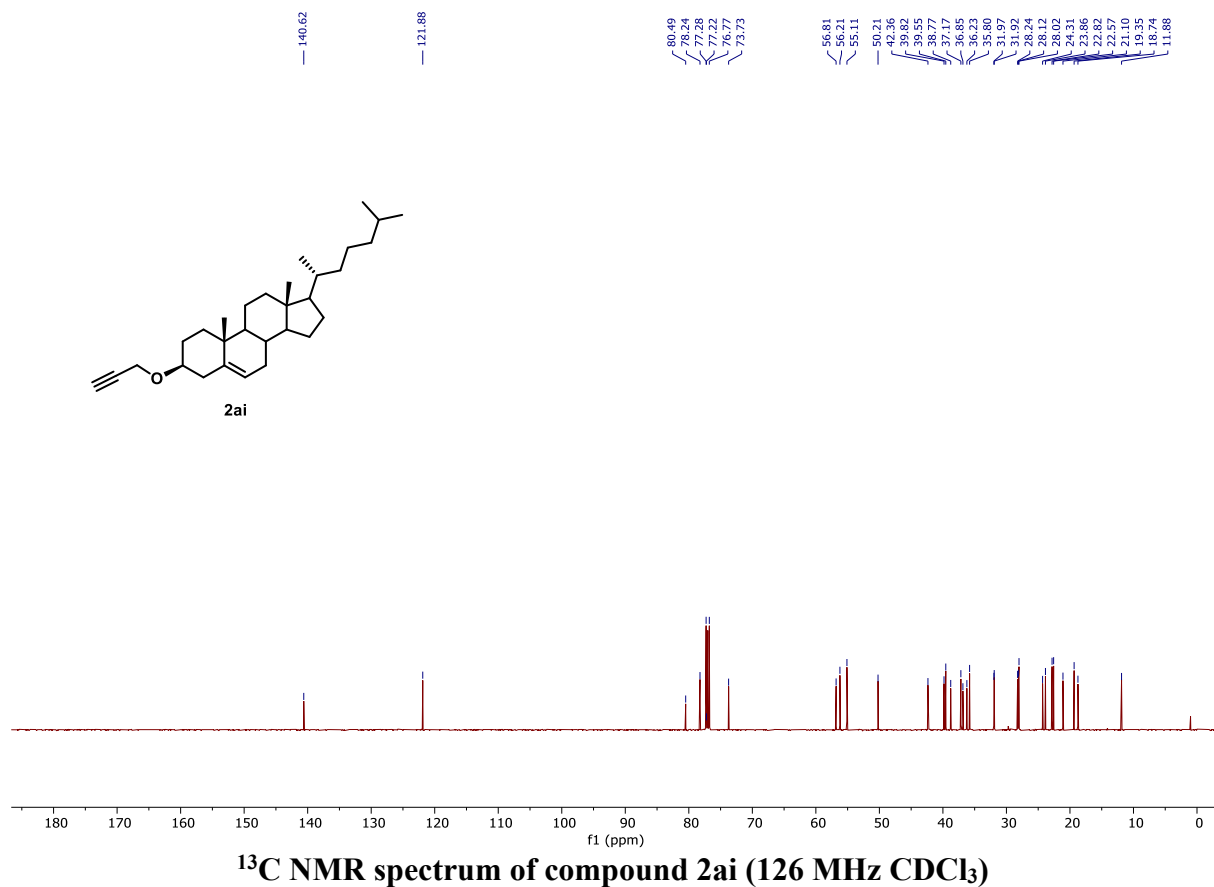

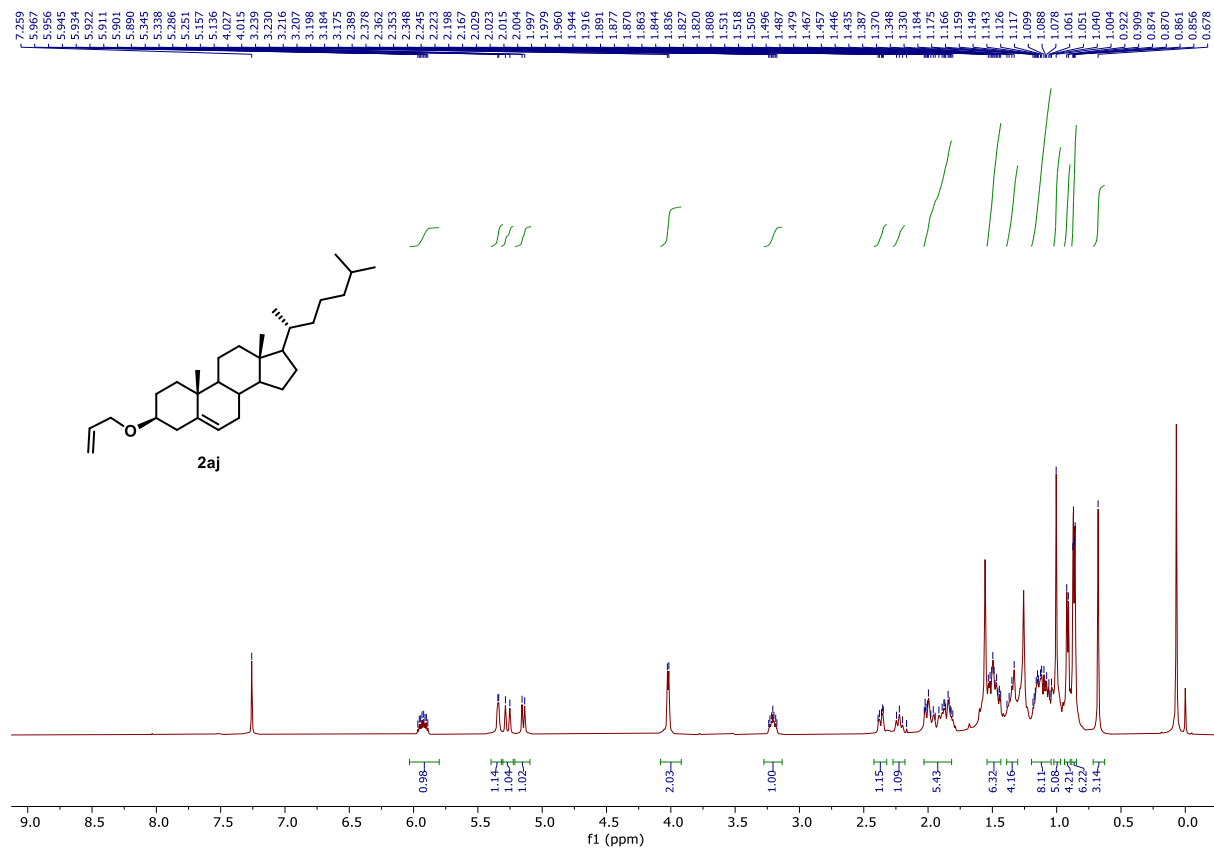

**<sup>1</sup>H NMR spectrum of compound 2aj (500 MHz CDCl<sub>3</sub>)**

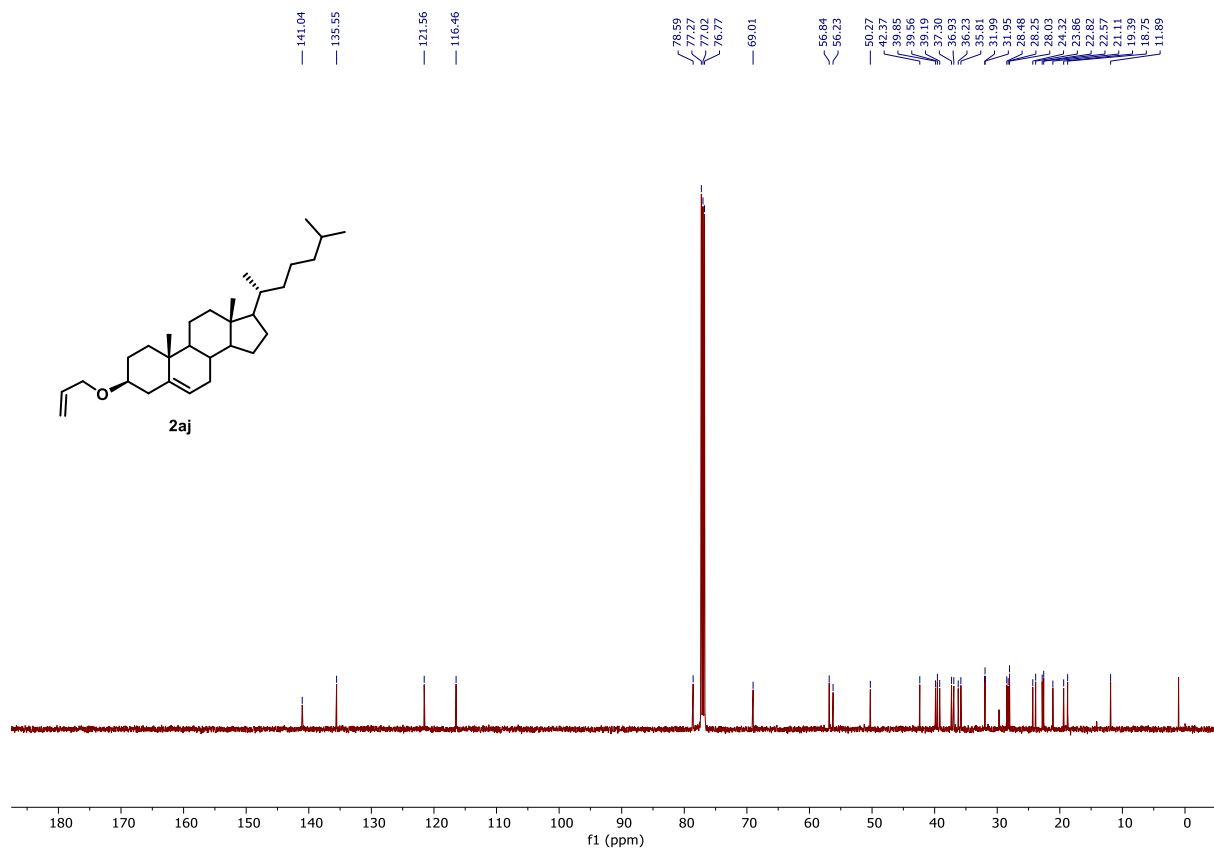

**<sup>13</sup>C NMR spectrum of compound 2aj (126 MHz CDCl<sub>3</sub>)**

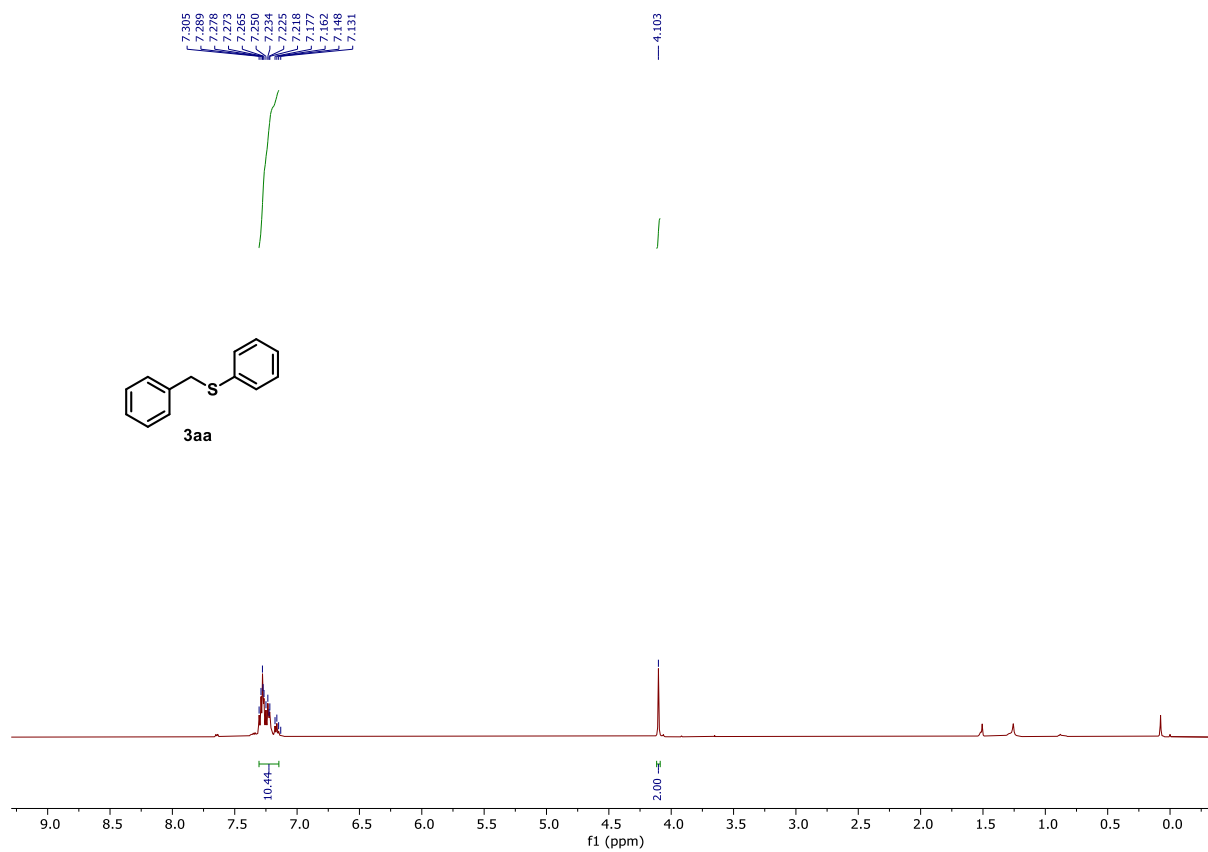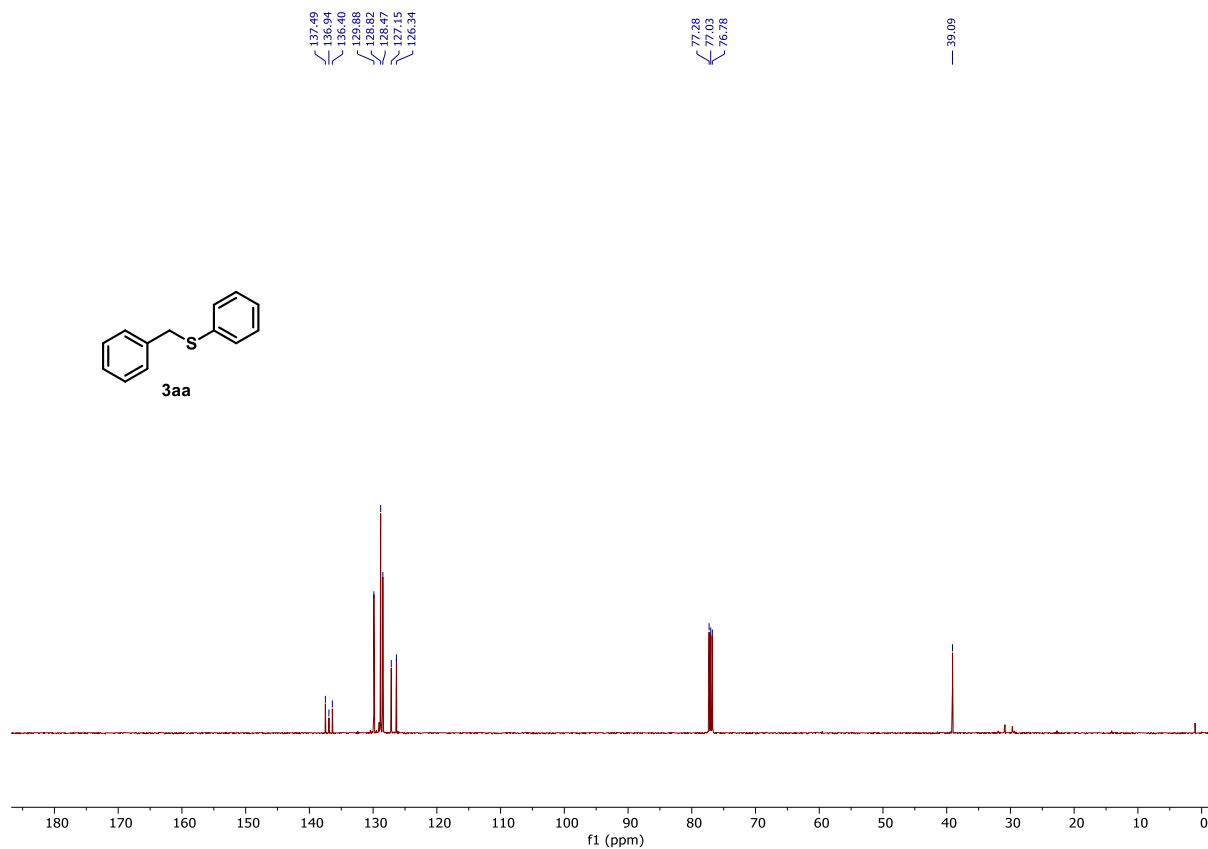

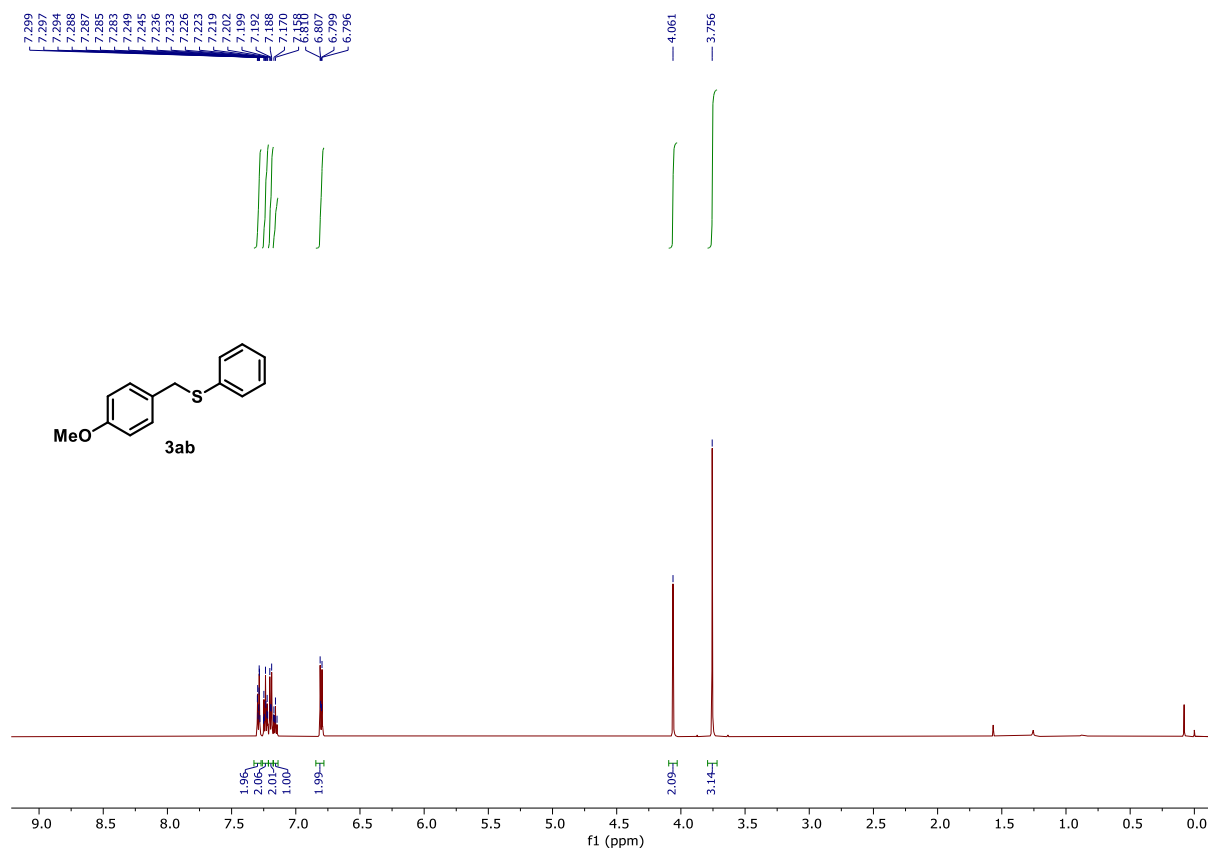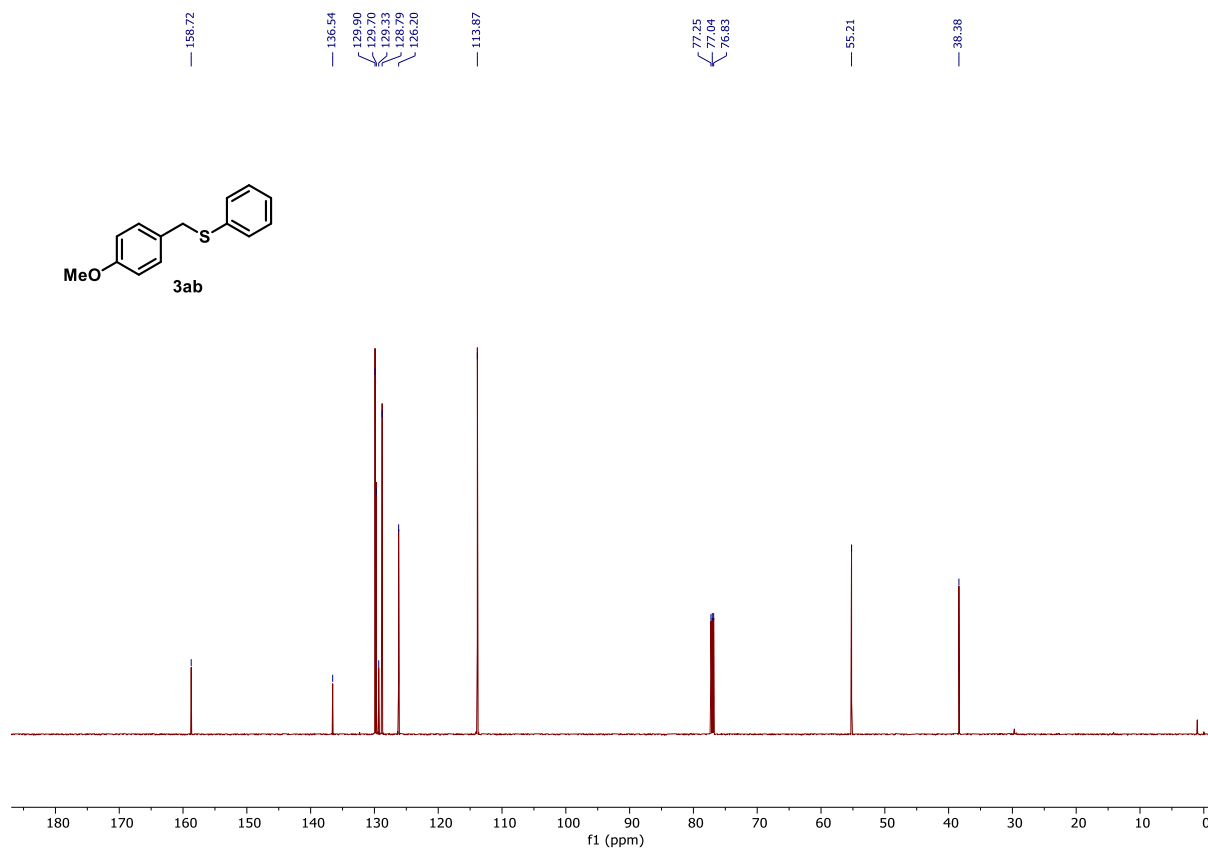

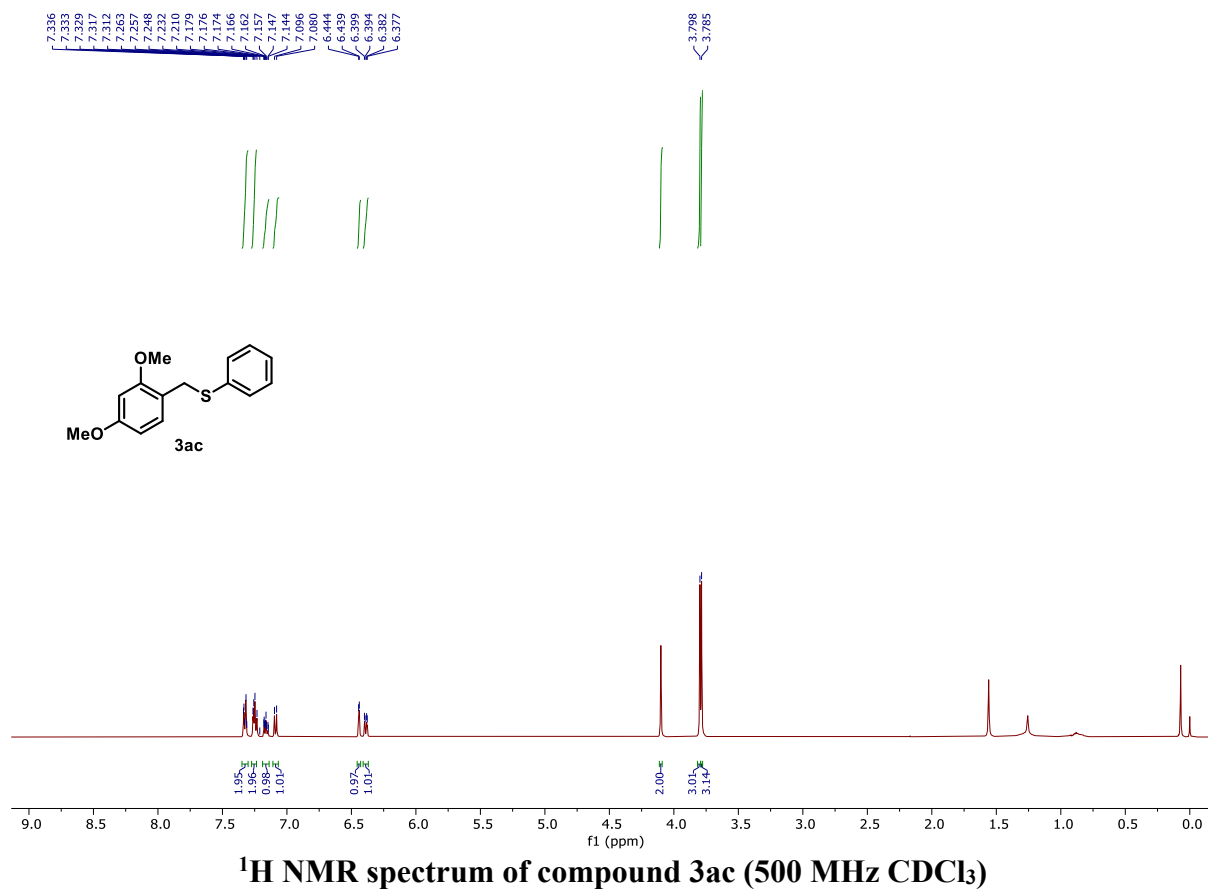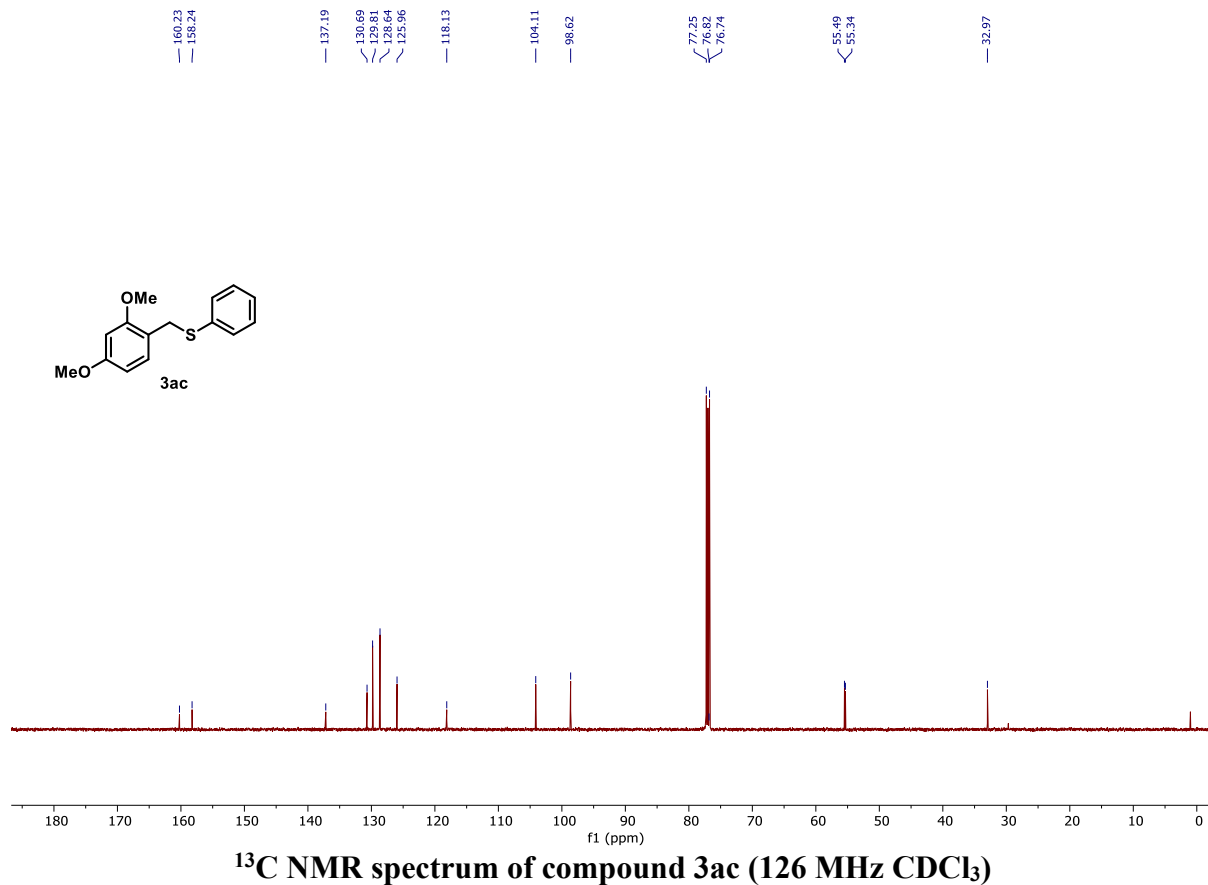

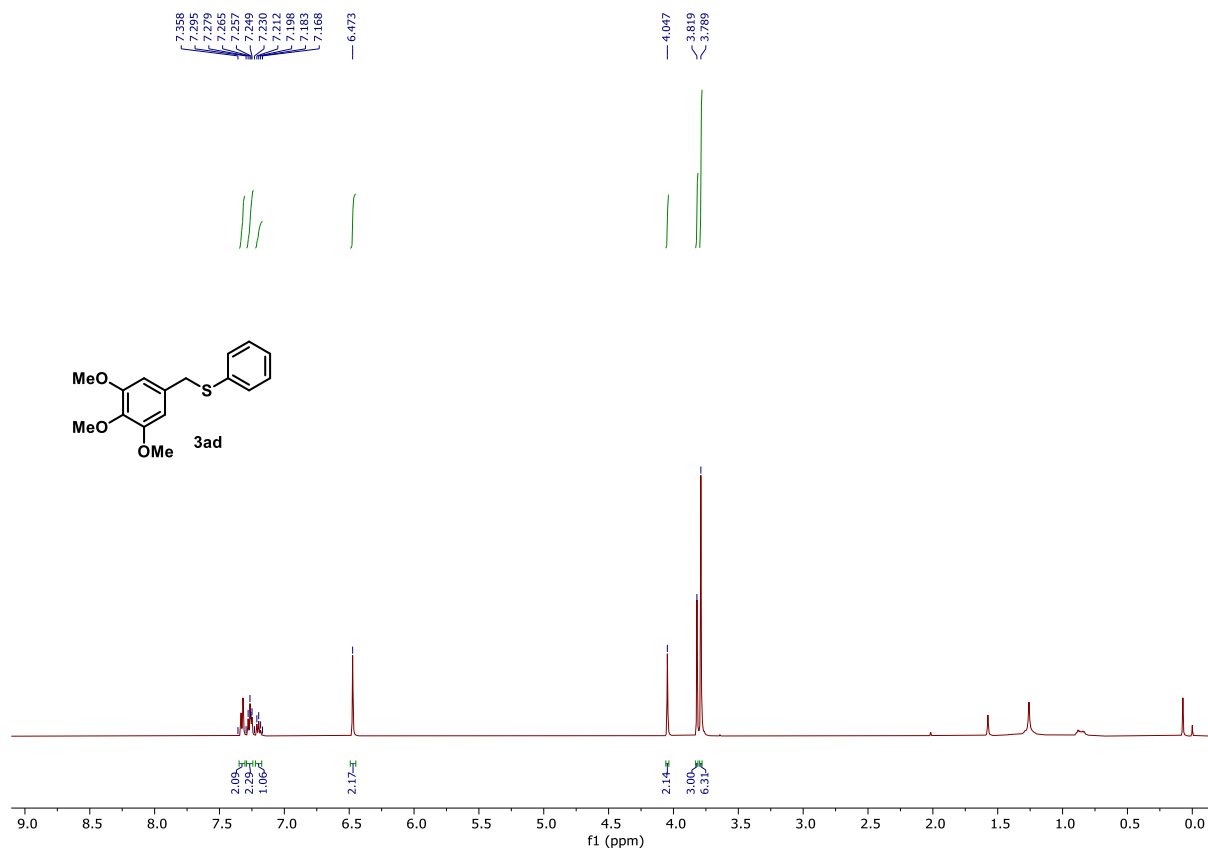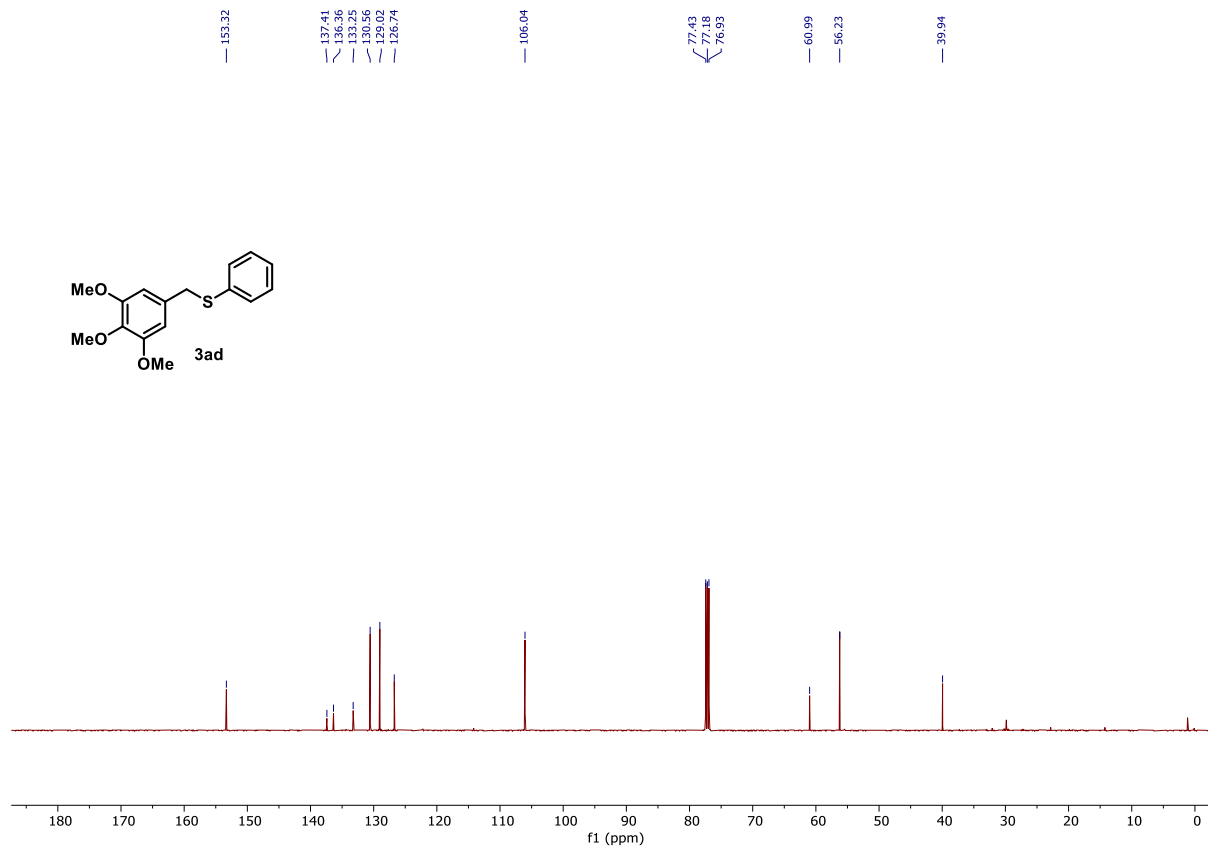



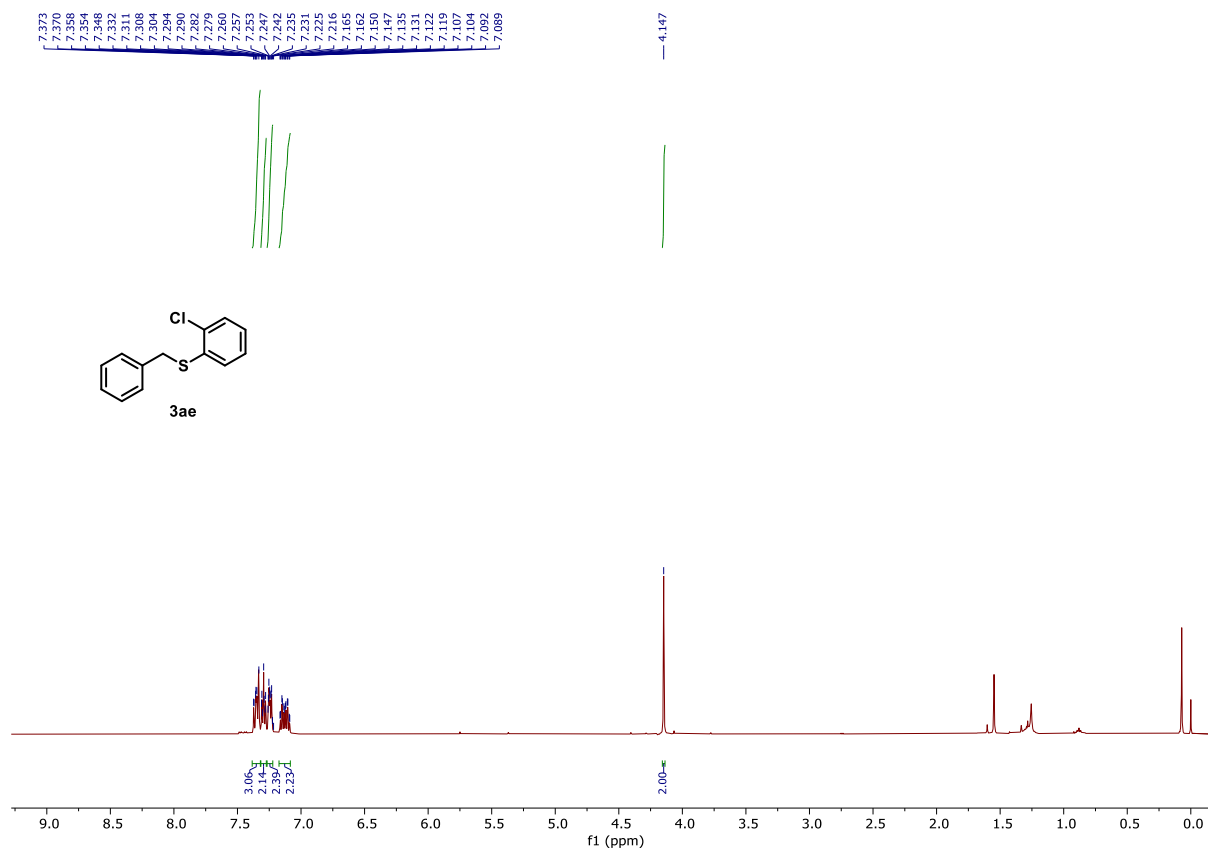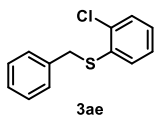

**<sup>1</sup>H NMR spectrum of compound 3ae (500 MHz CDCl<sub>3</sub>)**

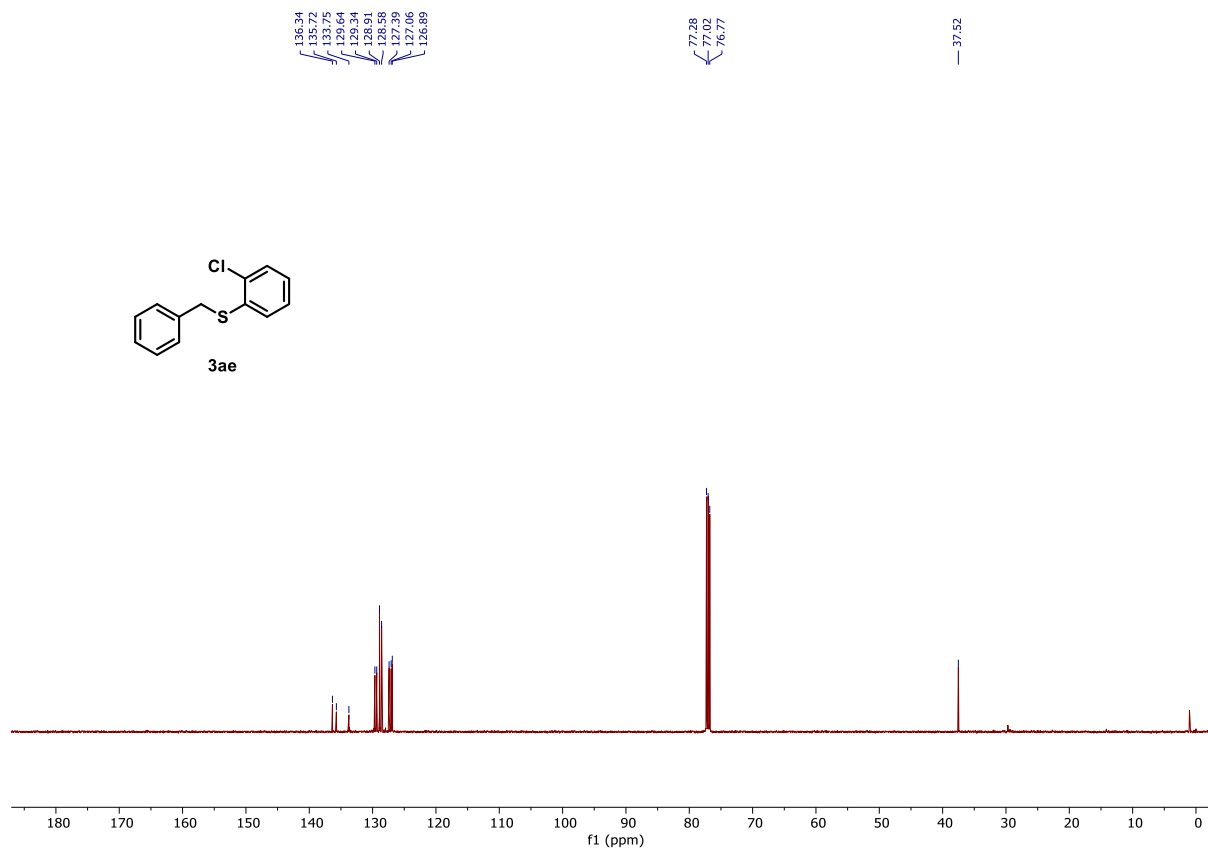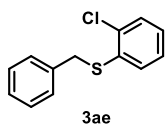

**<sup>13</sup>C NMR spectrum of compound 3ae (126 MHz CDCl<sub>3</sub>)**

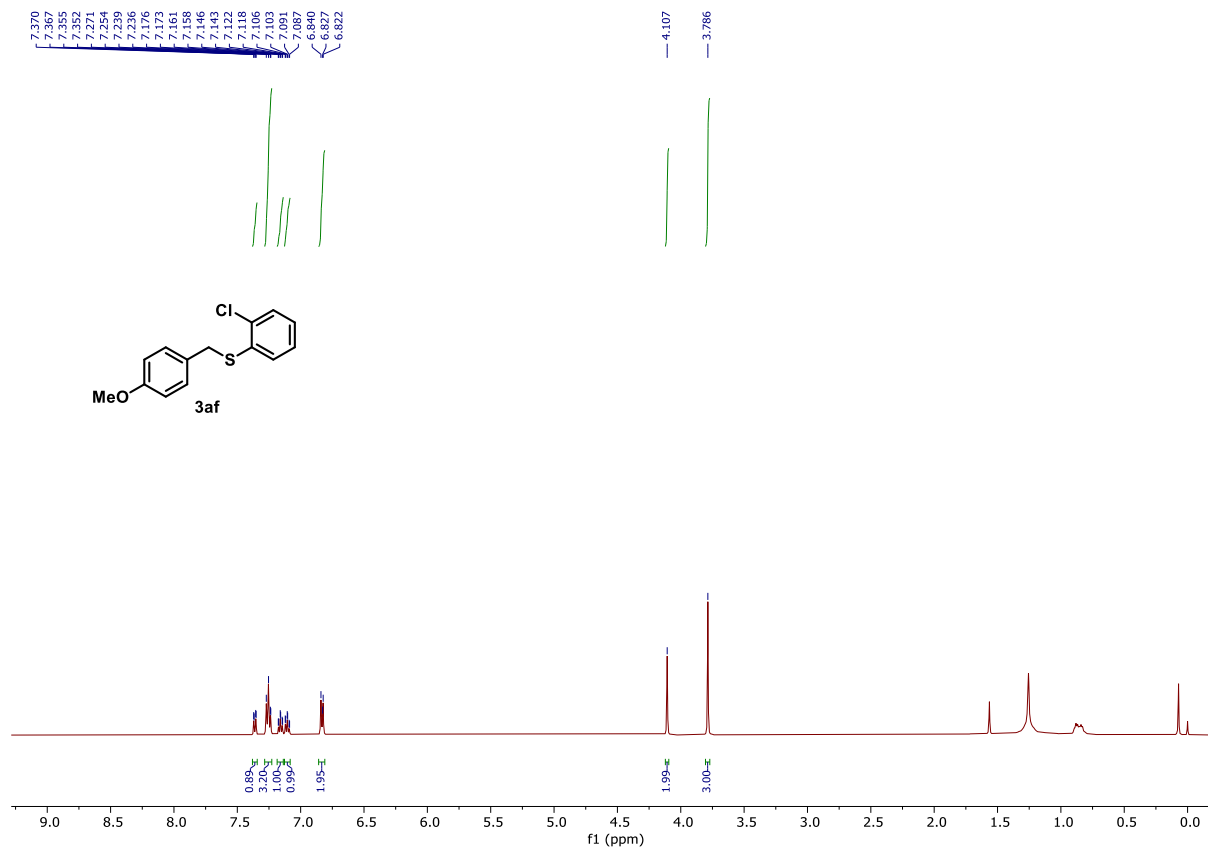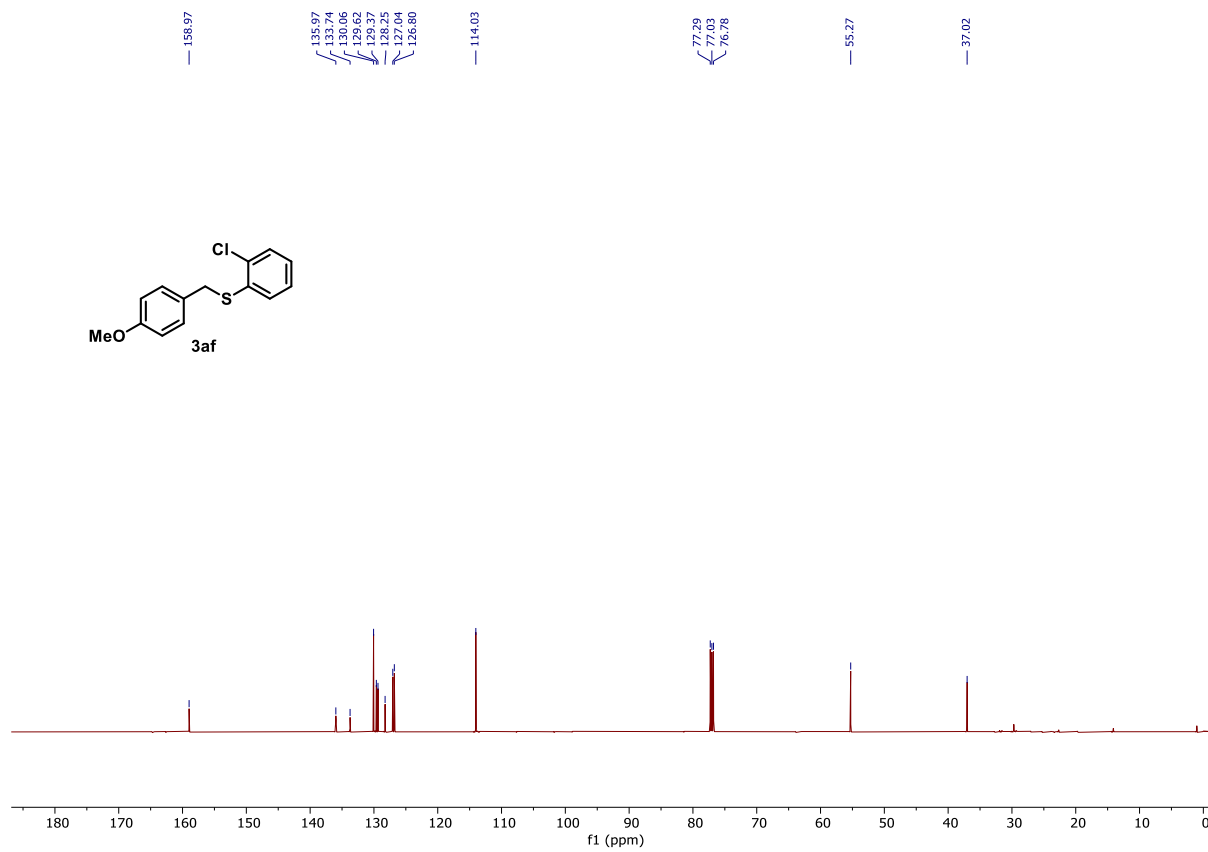

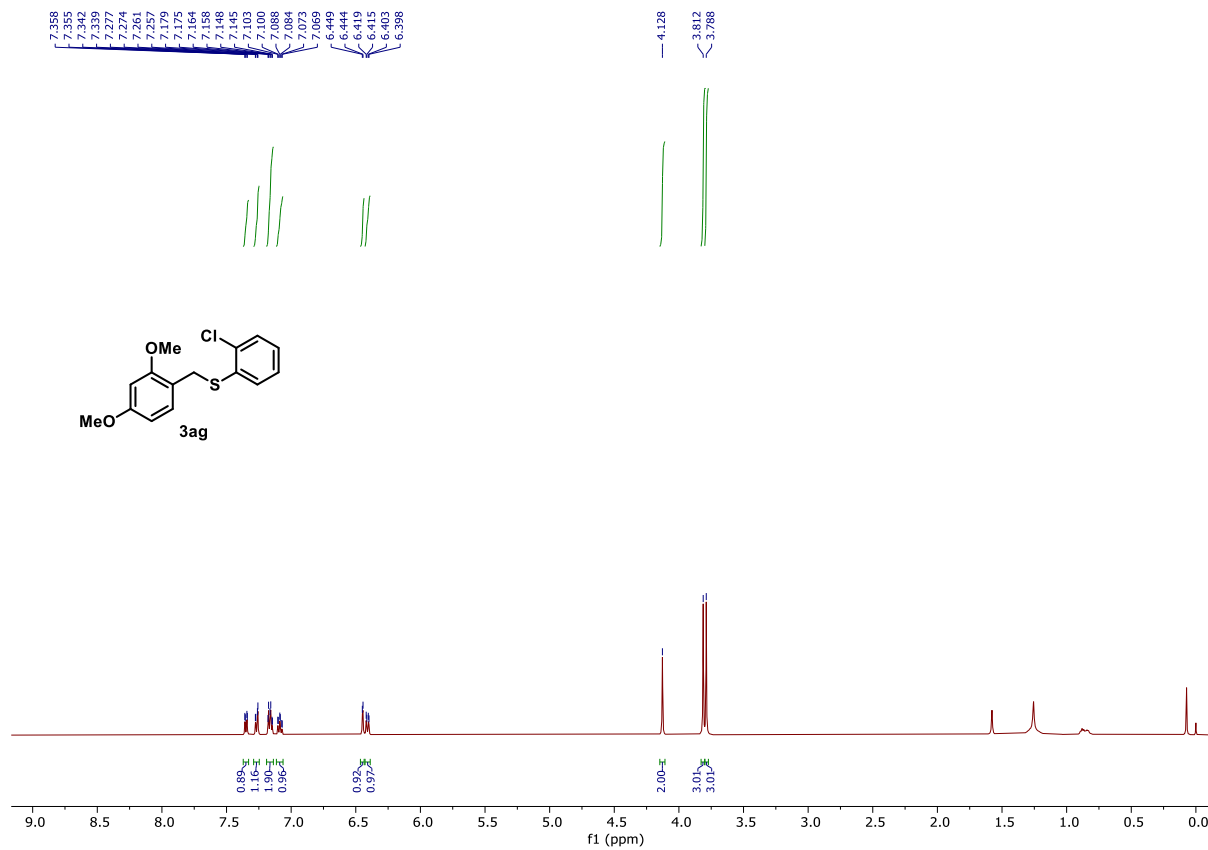

<sup>1</sup>H NMR spectrum of compound 3ag (500 MHz CDCl<sub>3</sub>)

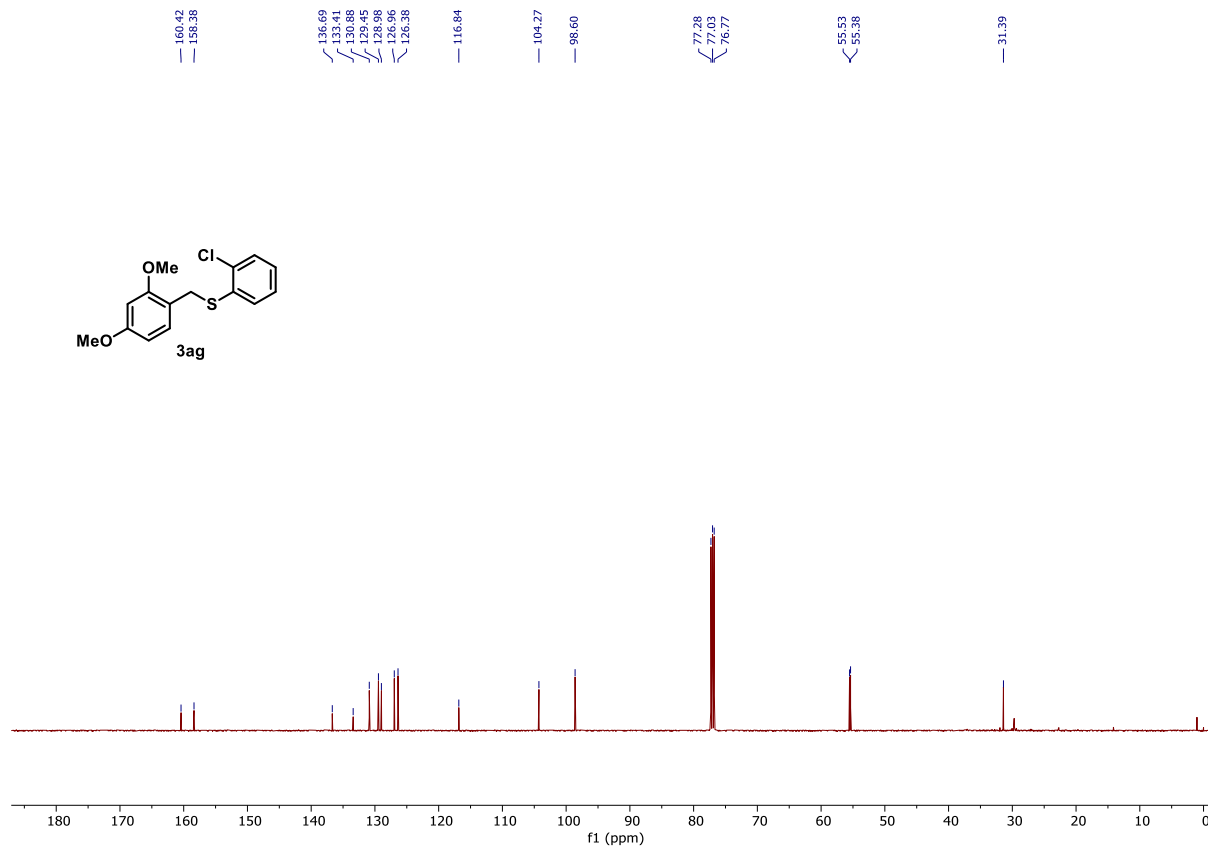

<sup>13</sup>C NMR spectrum of compound 3ag (126 MHz CDCl<sub>3</sub>)

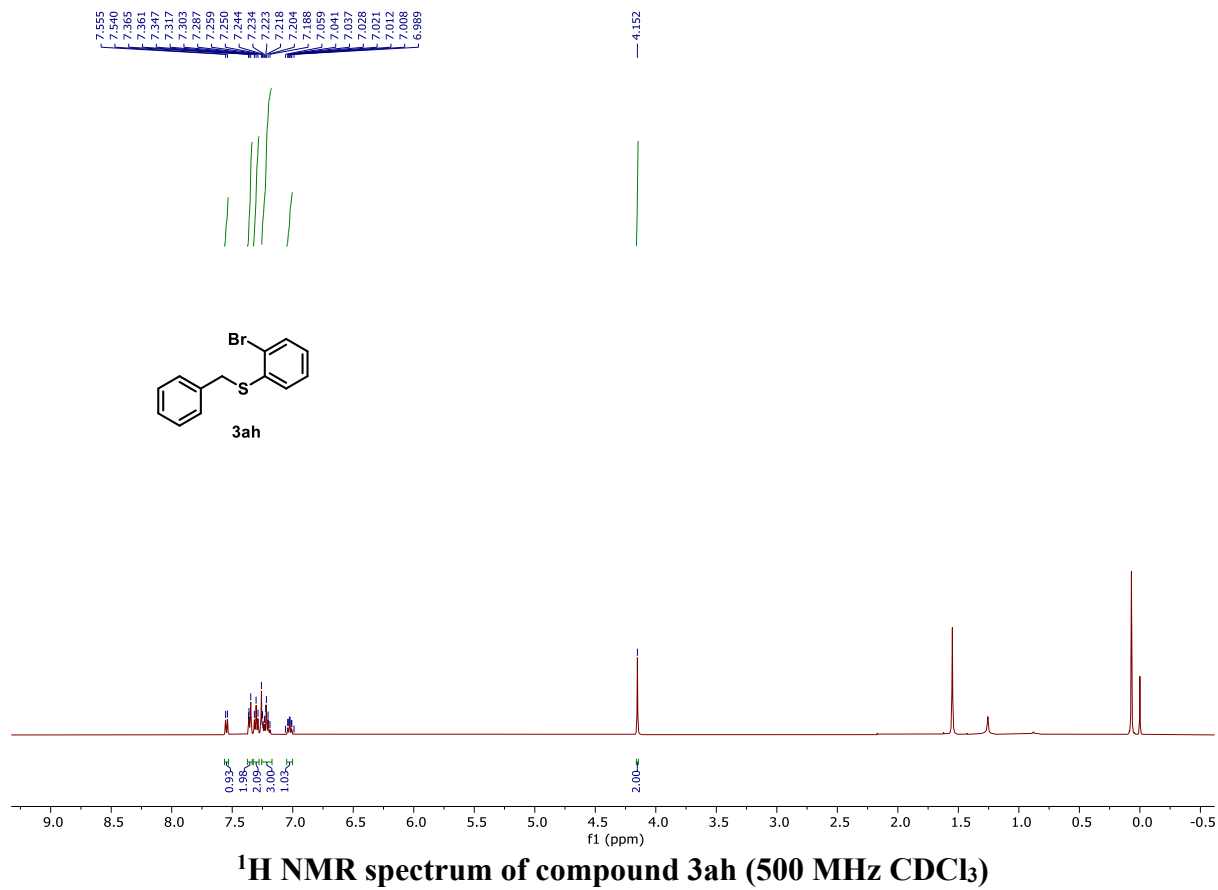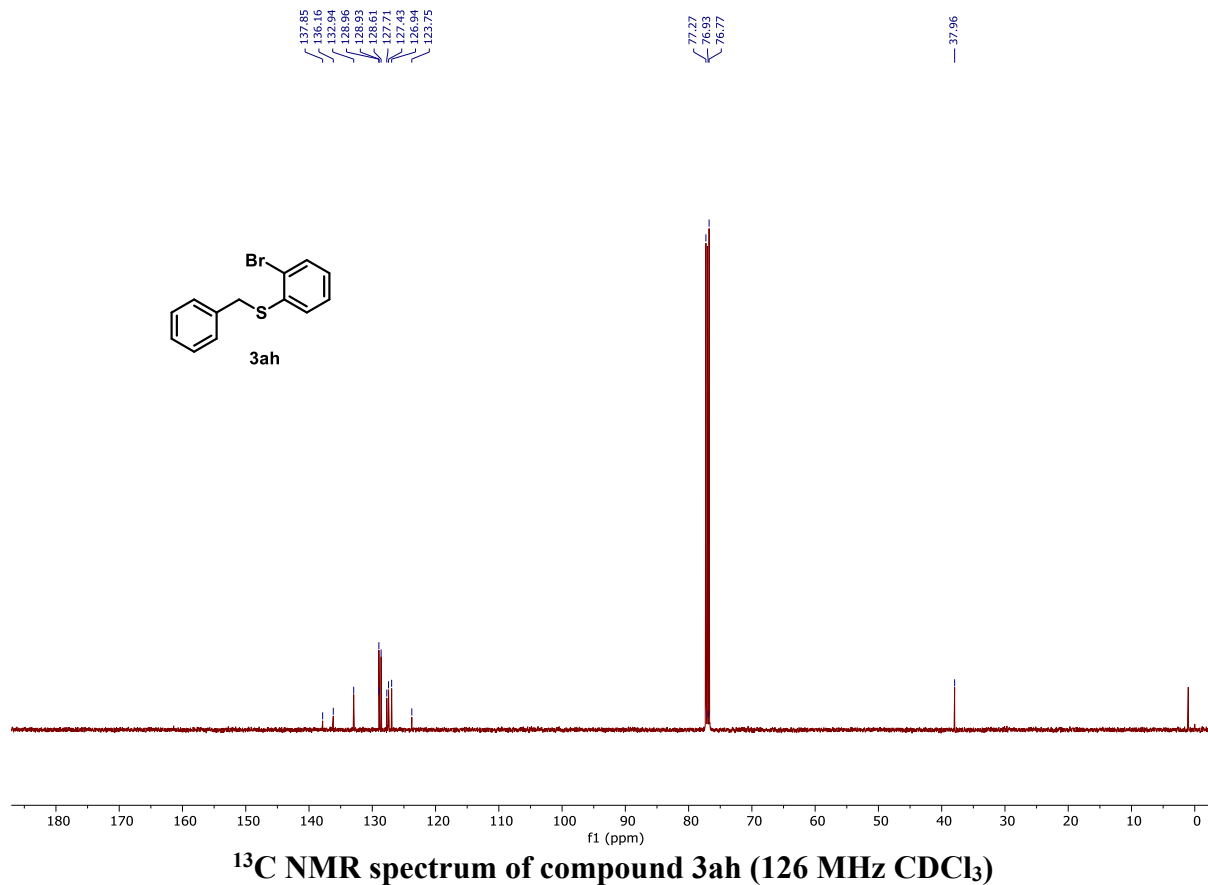

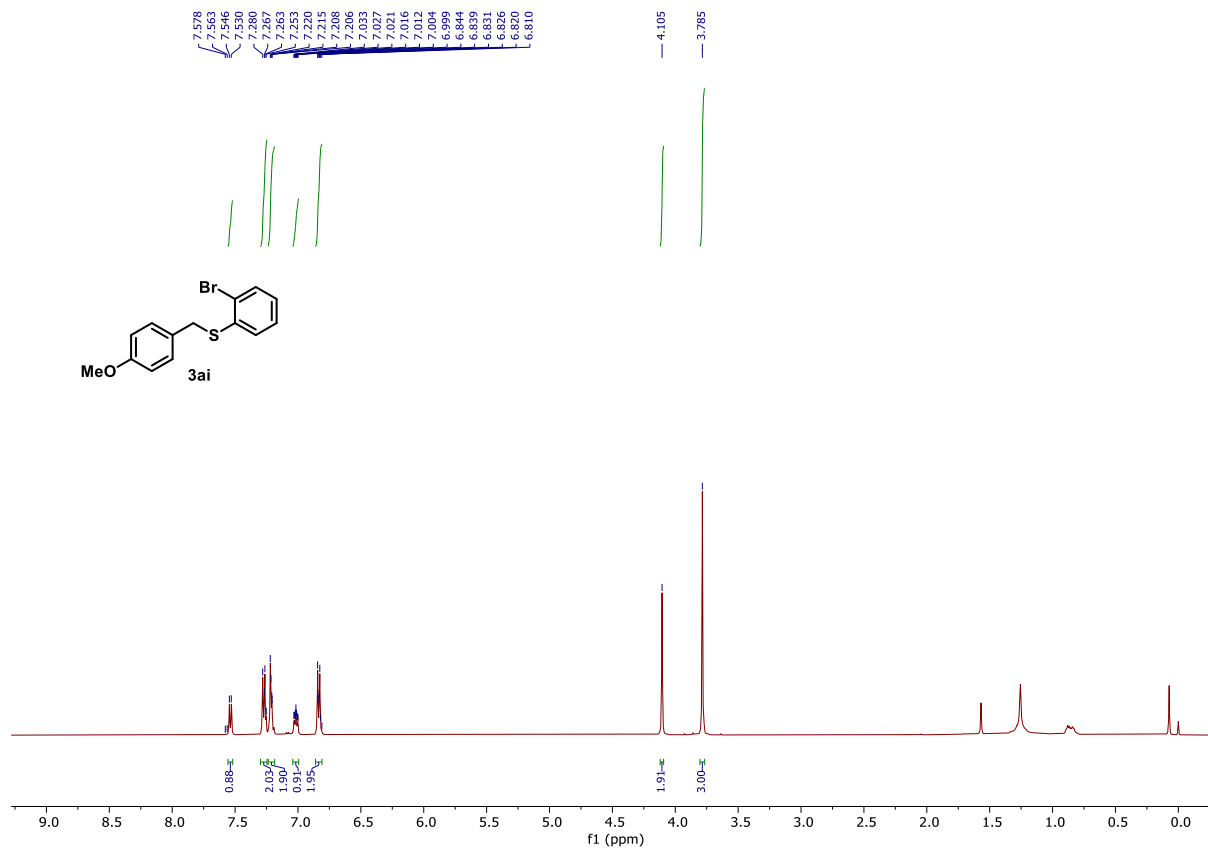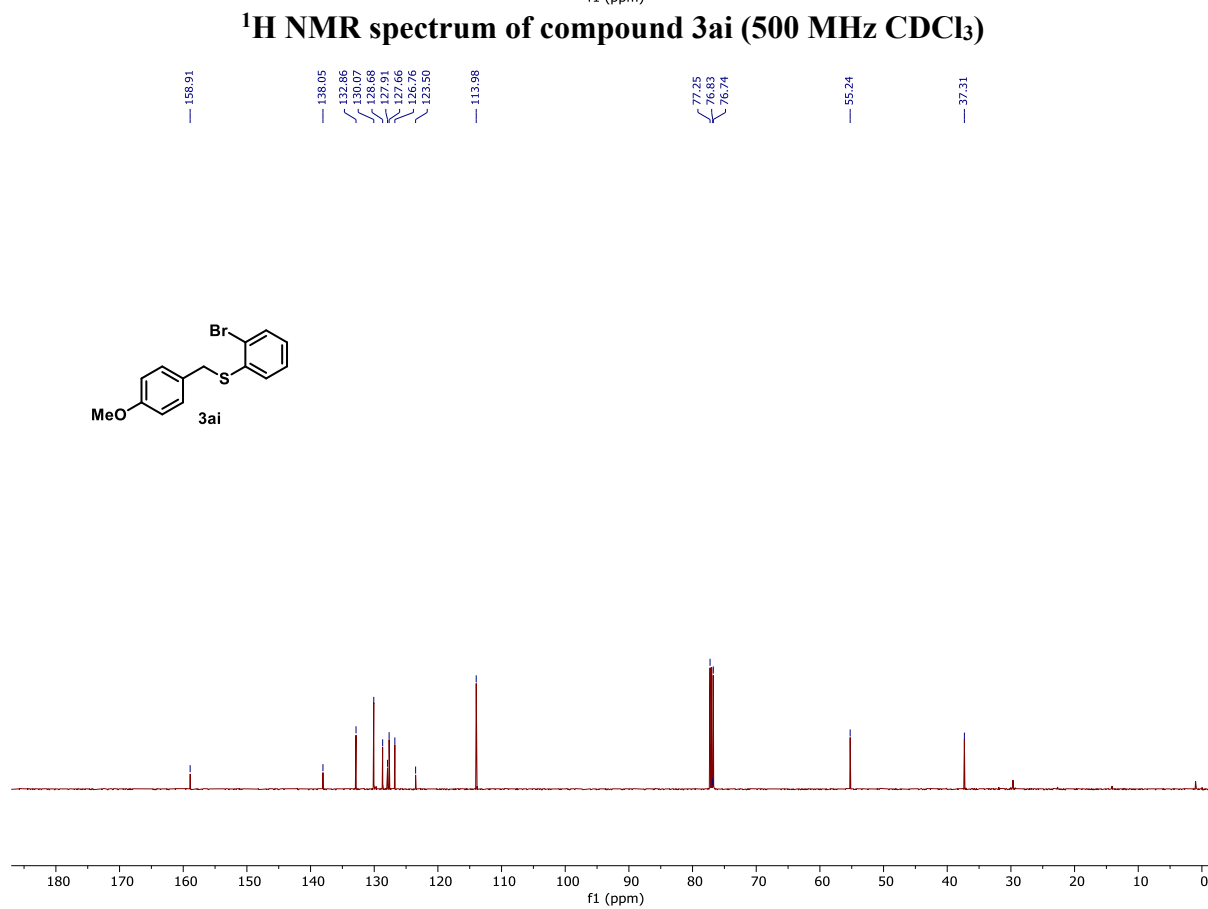

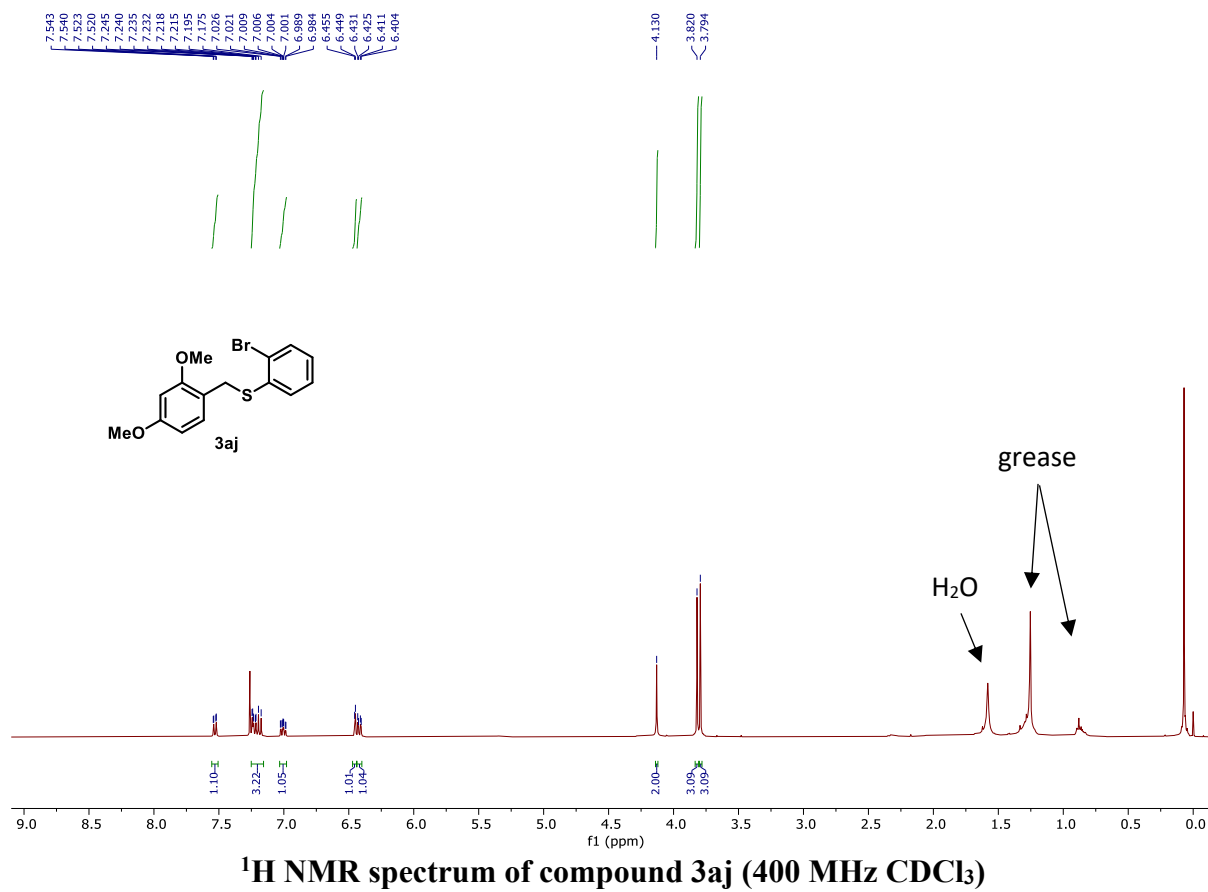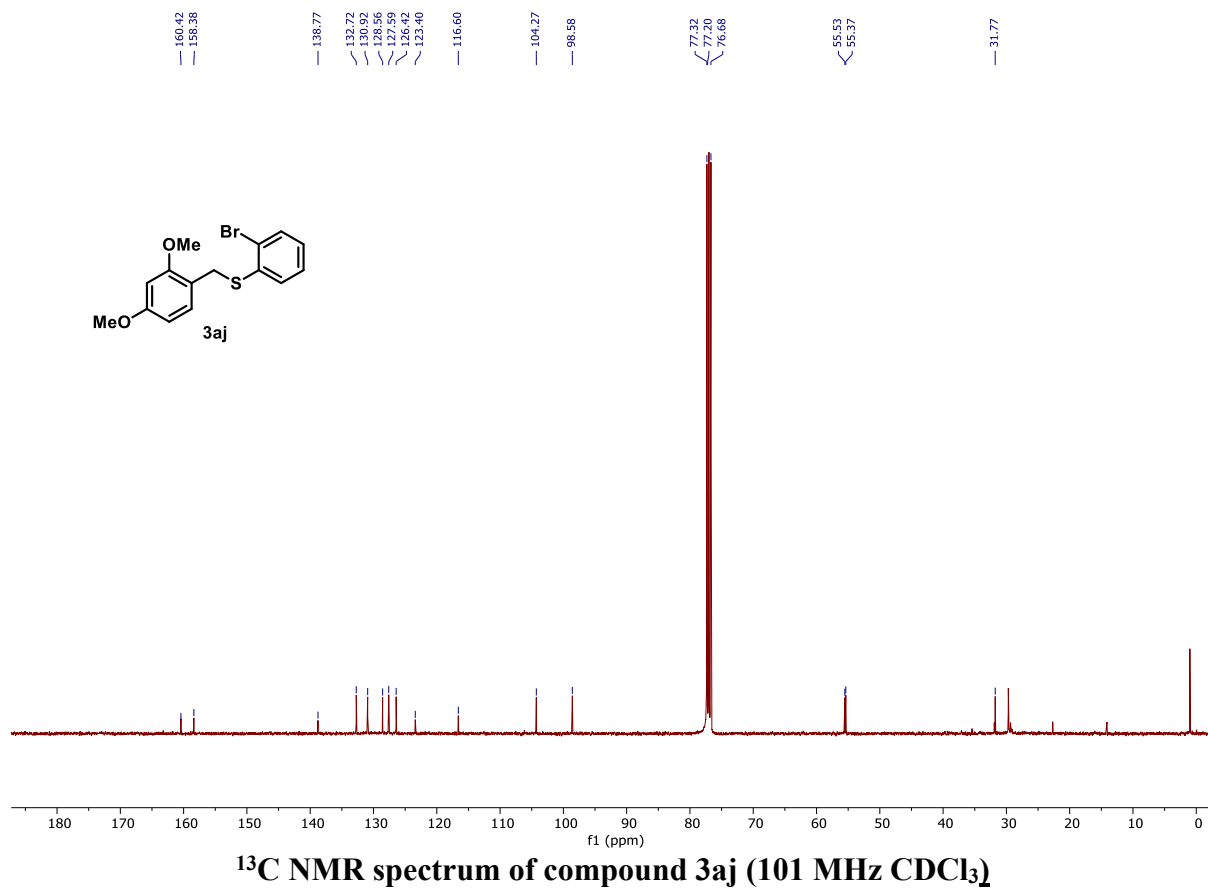

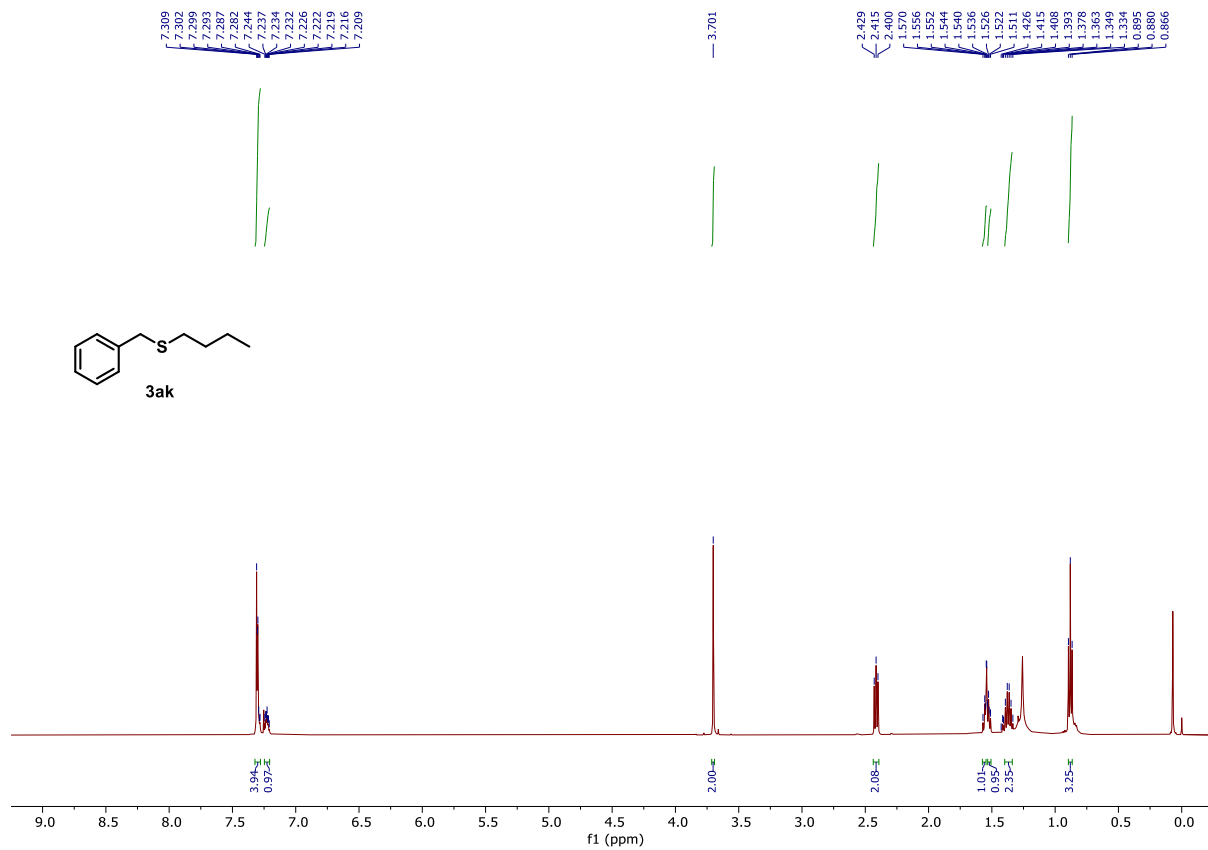

**<sup>1</sup>H NMR spectrum of compound 3ak**

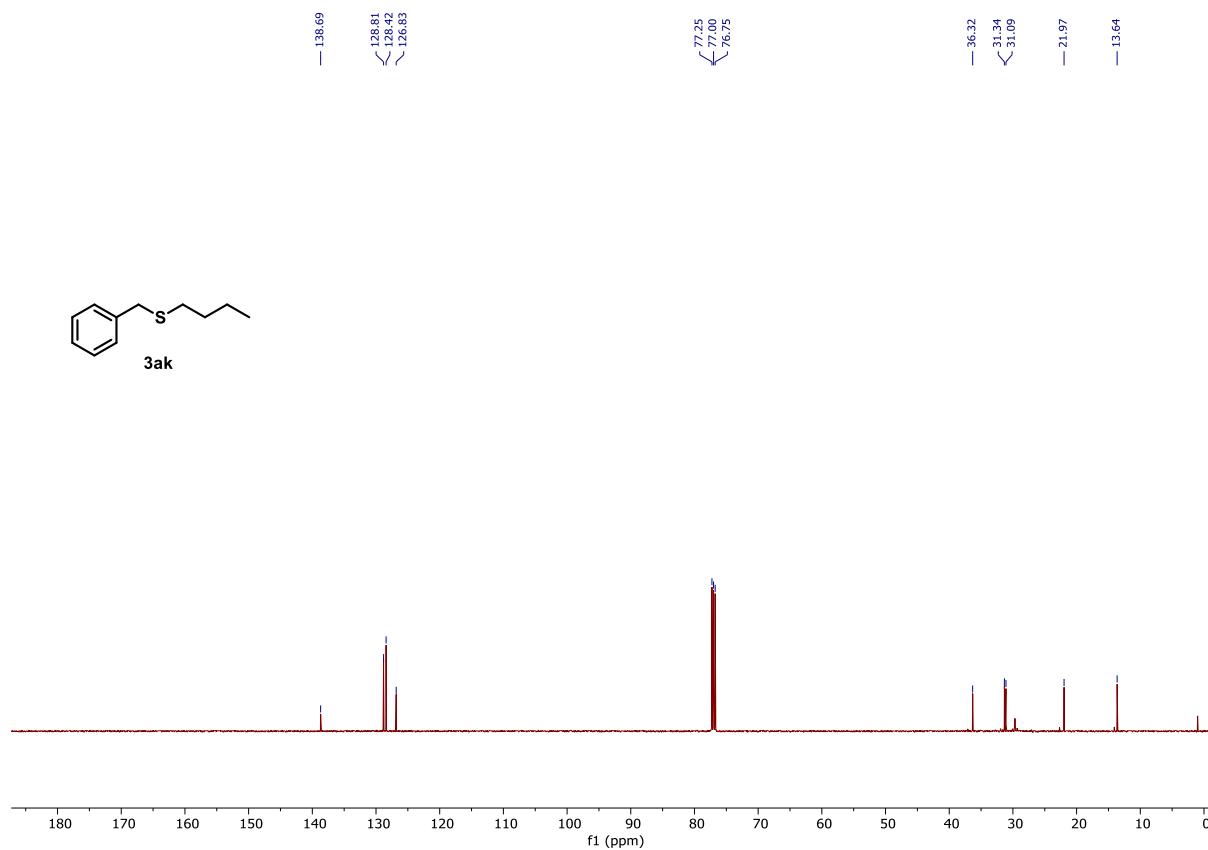

**<sup>13</sup>C NMR spectrum of compound 3ak**

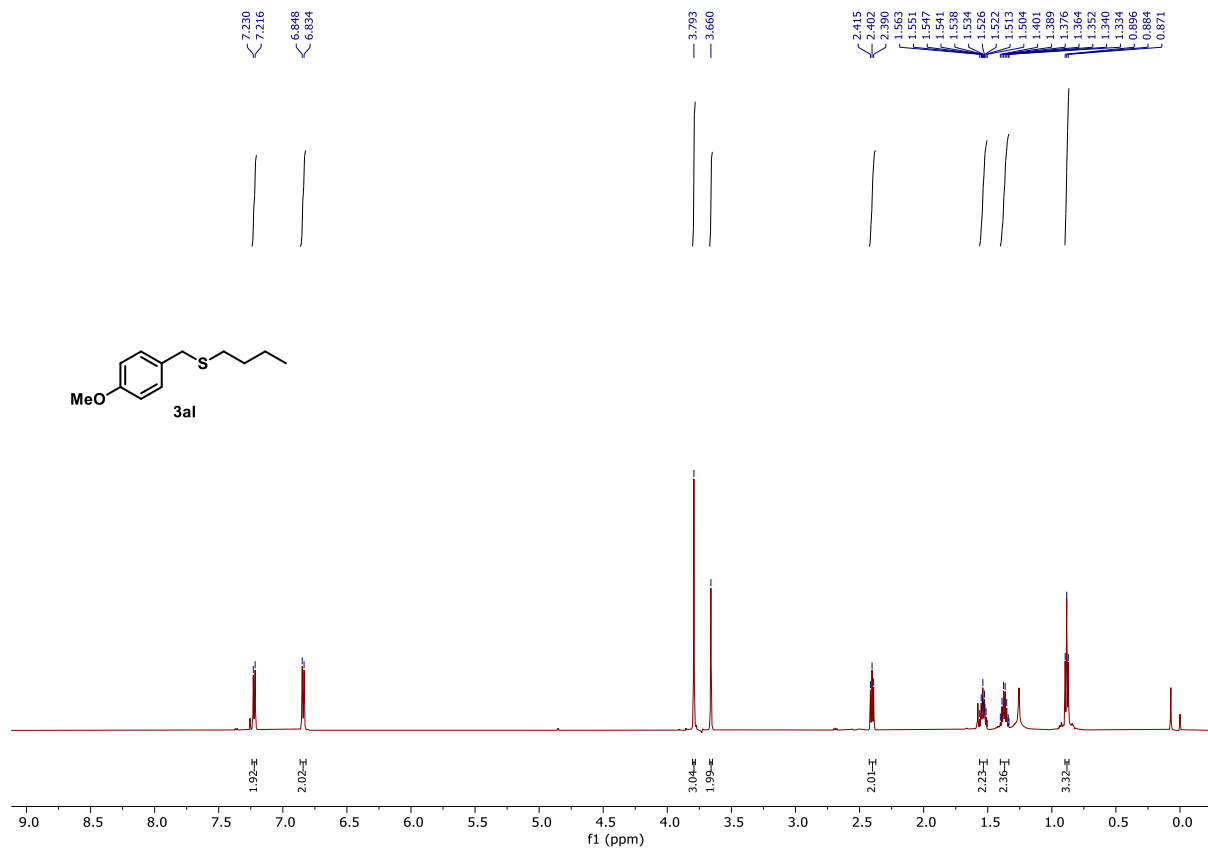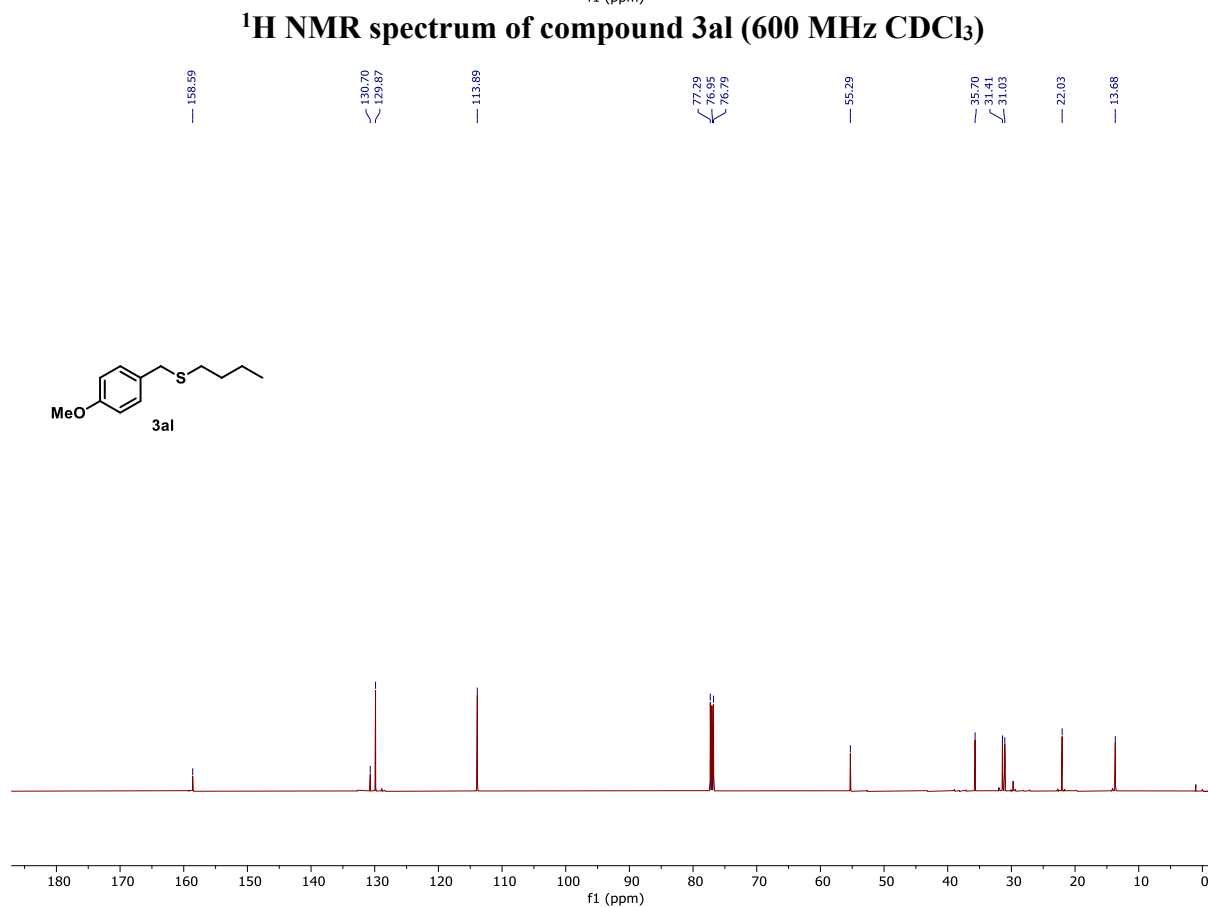



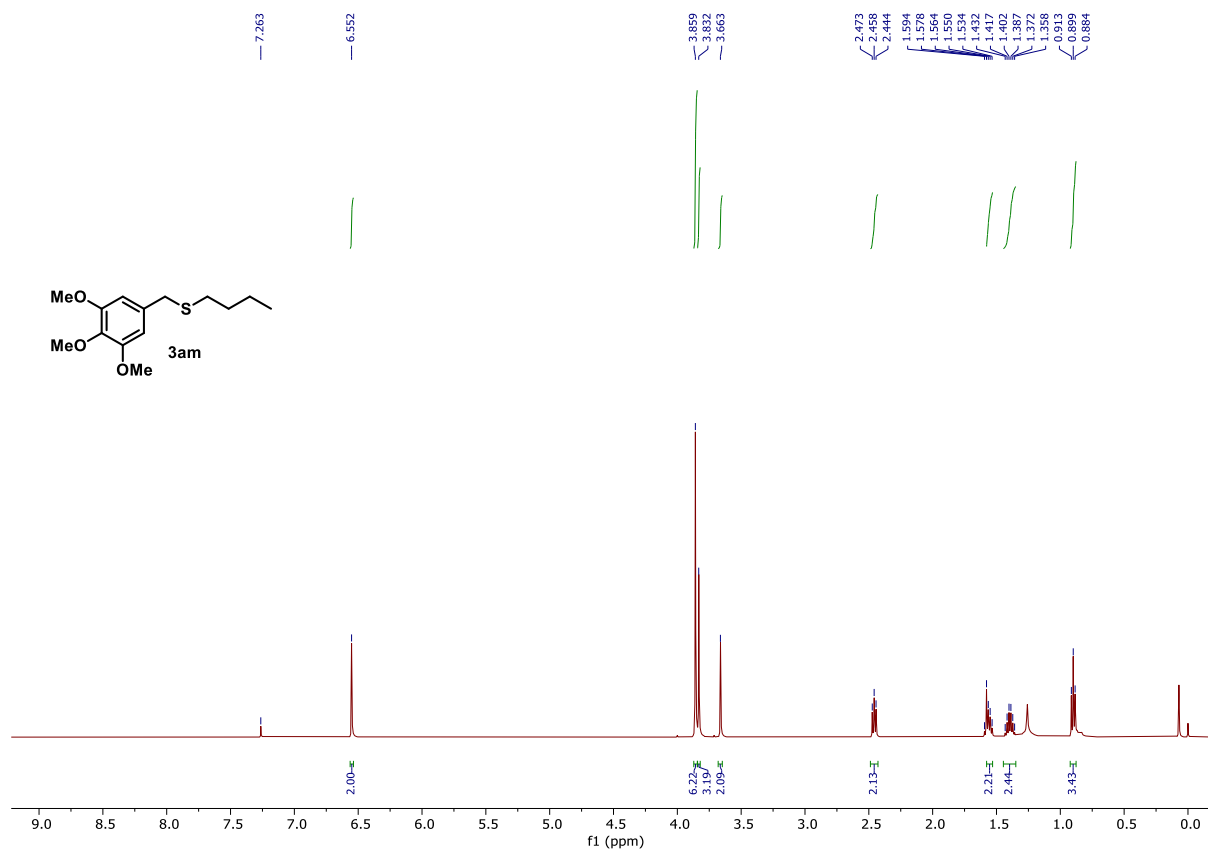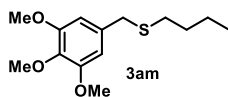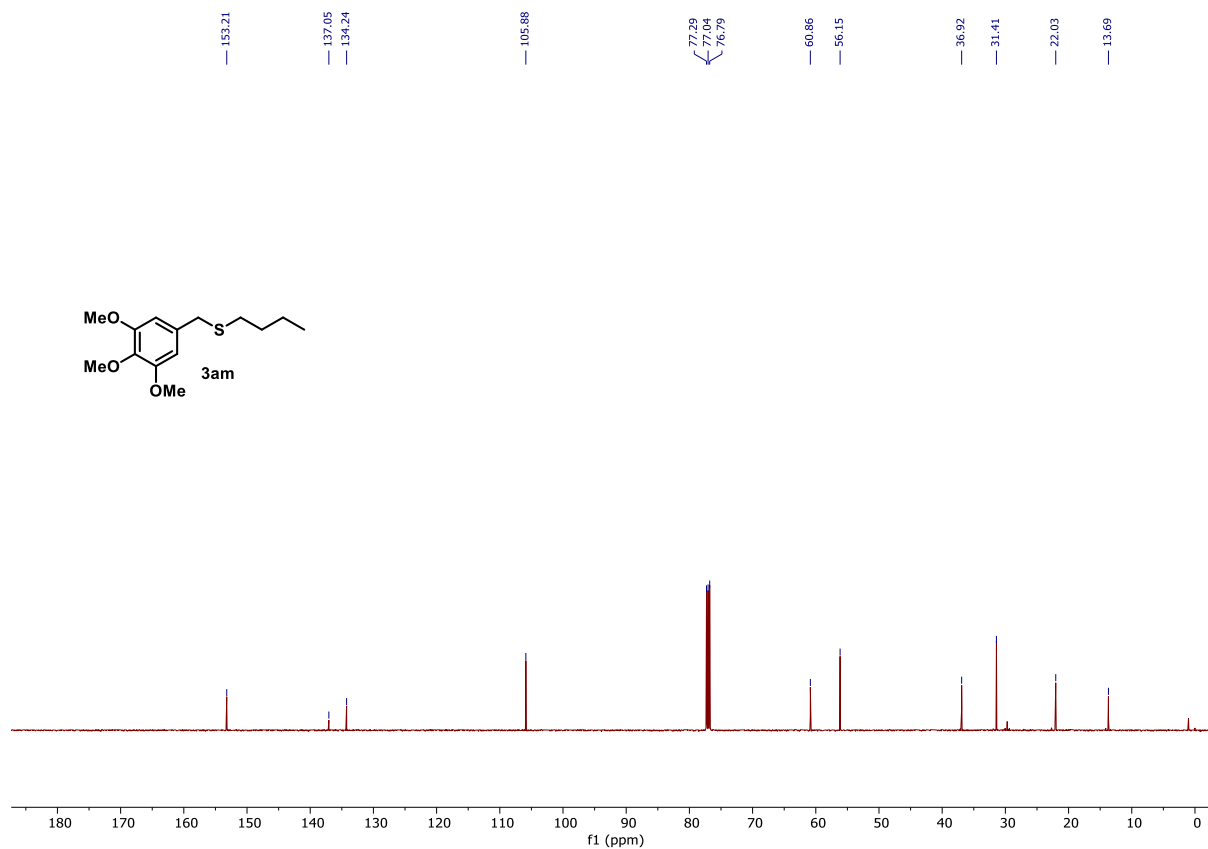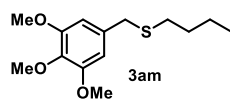

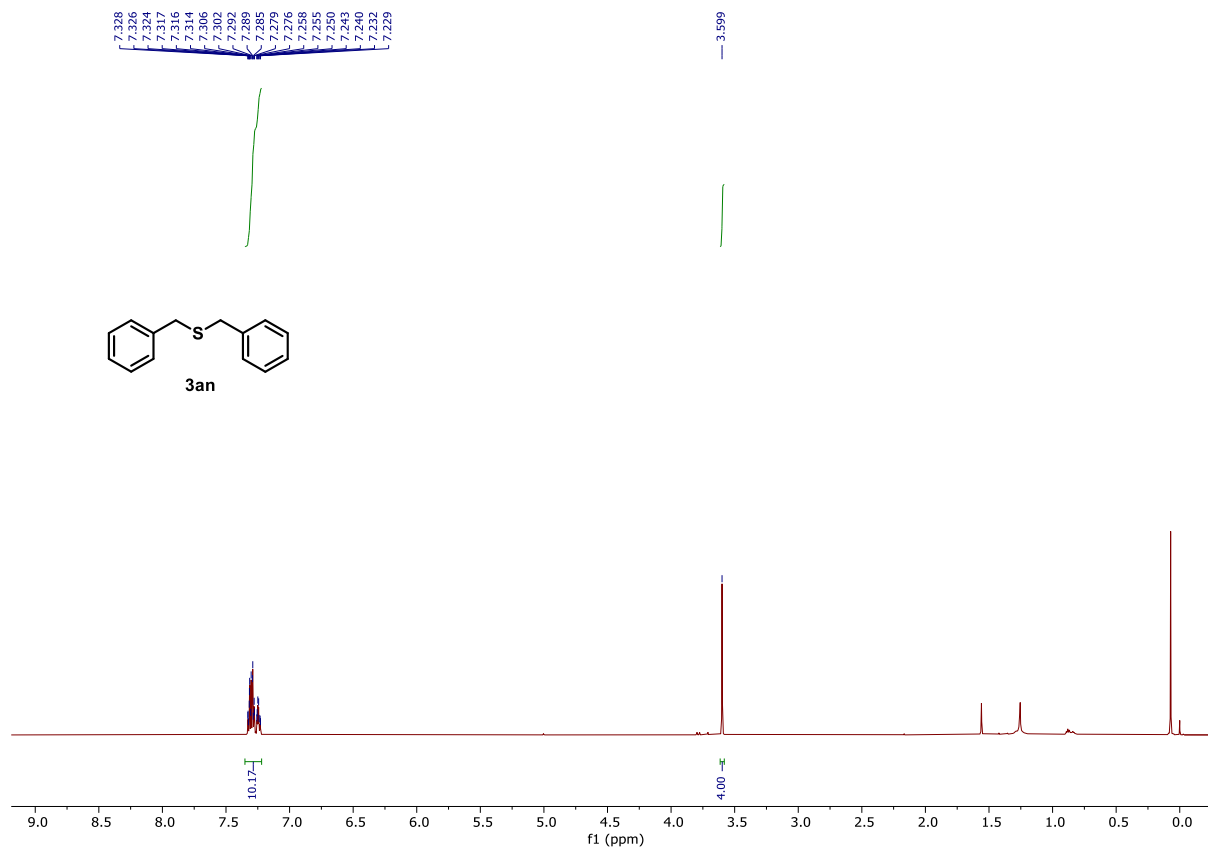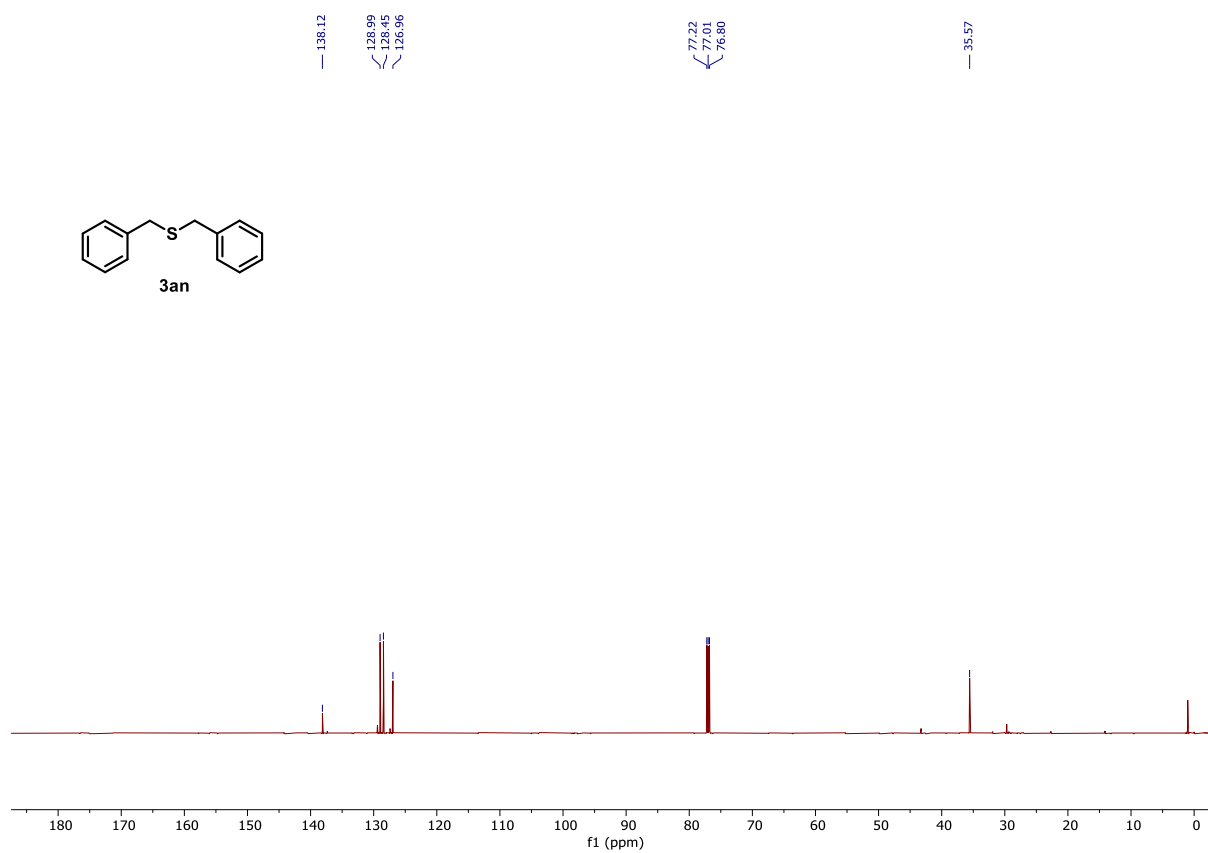

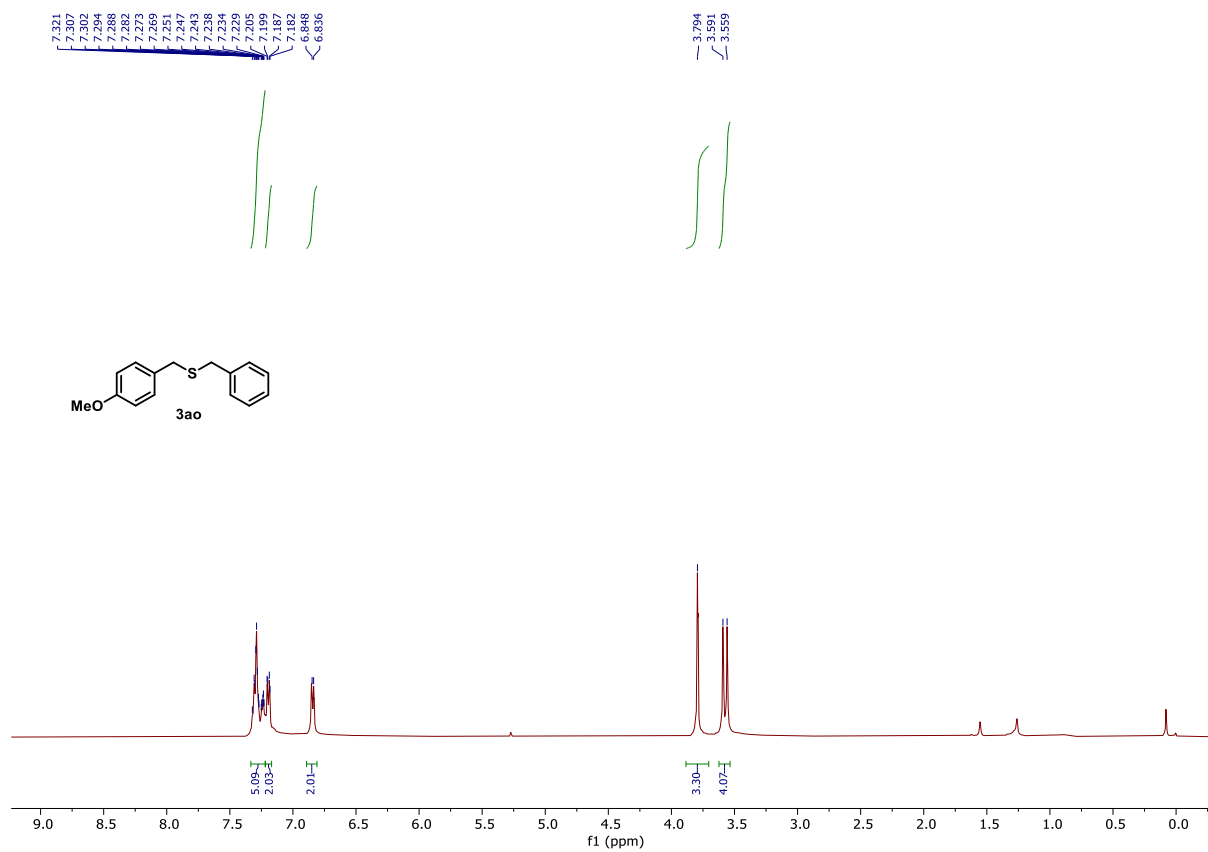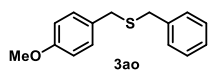

**<sup>1</sup>H NMR spectrum of compound 3ao (500 MHz CDCl<sub>3</sub>)**

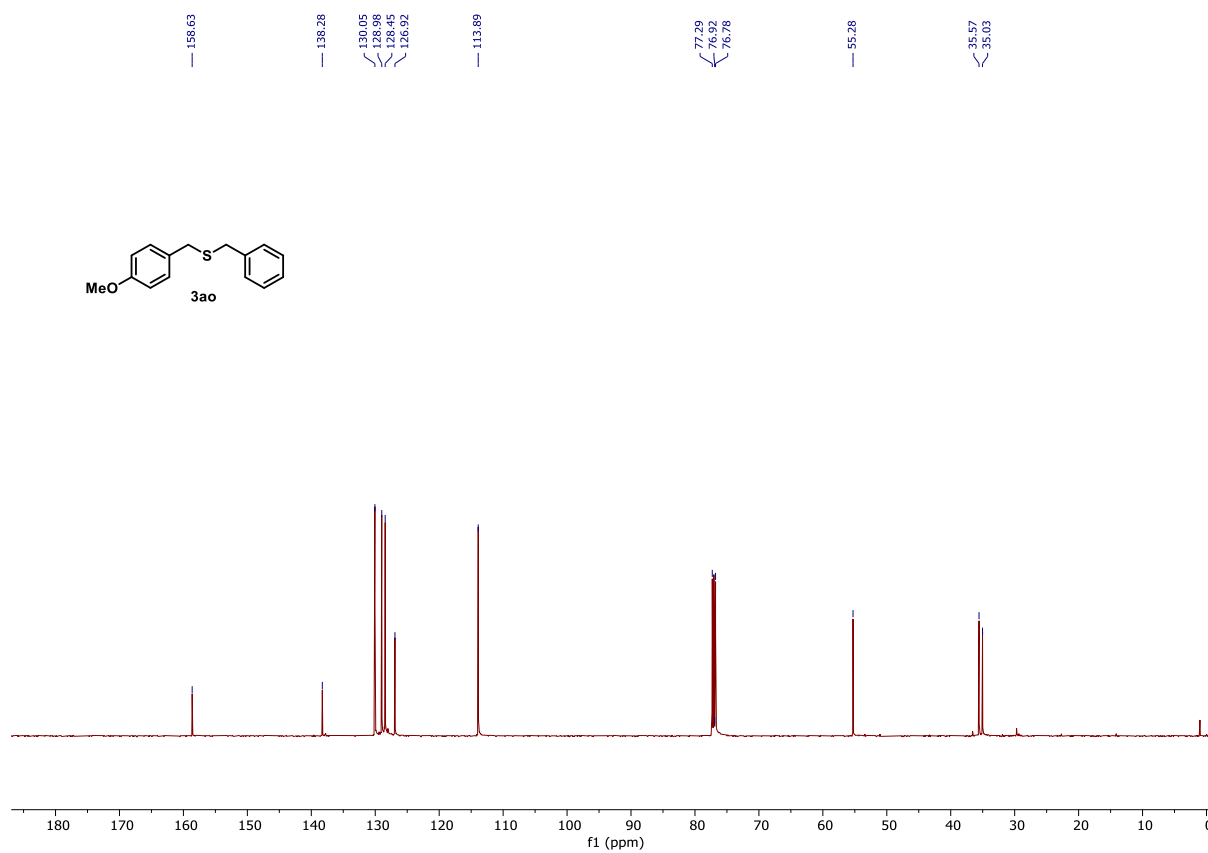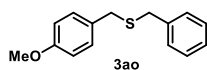

**<sup>13</sup>C NMR spectrum of compound 3ao (126 MHz CDCl<sub>3</sub>)**

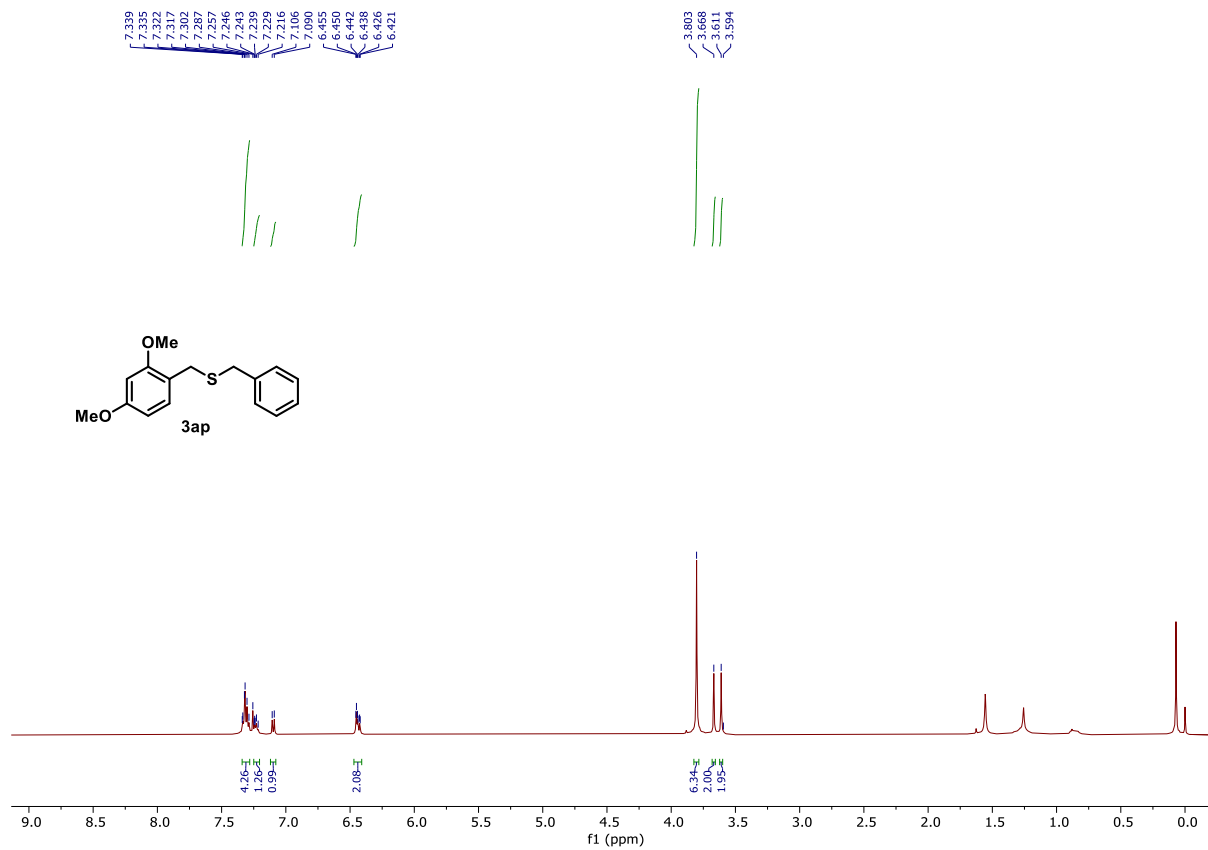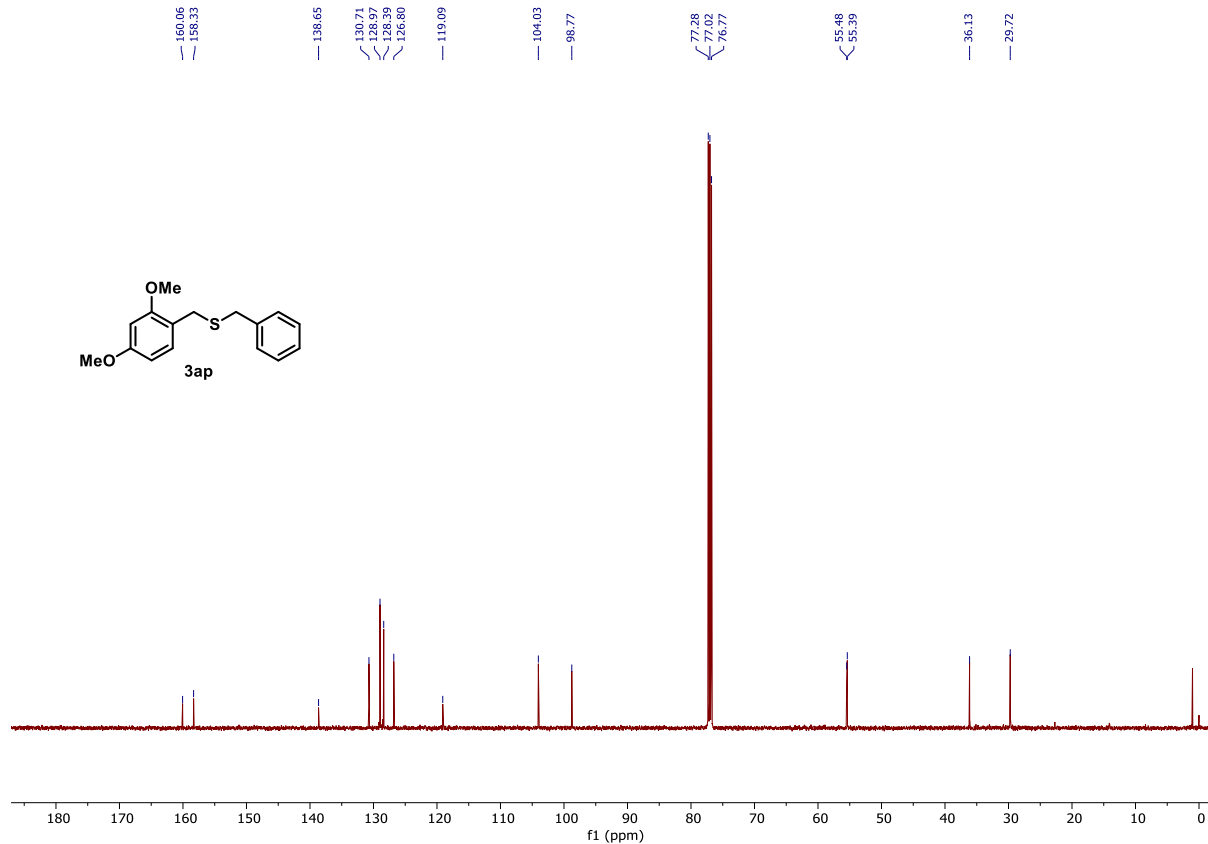

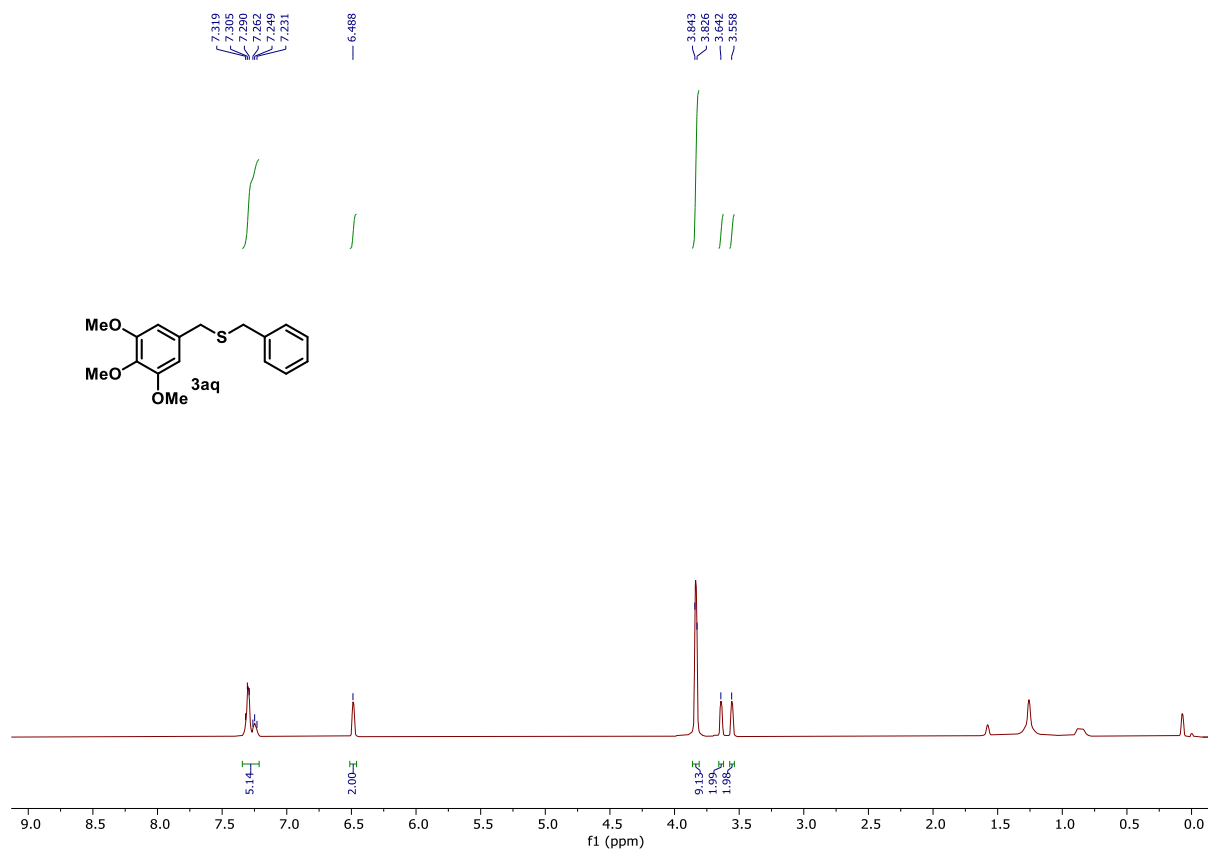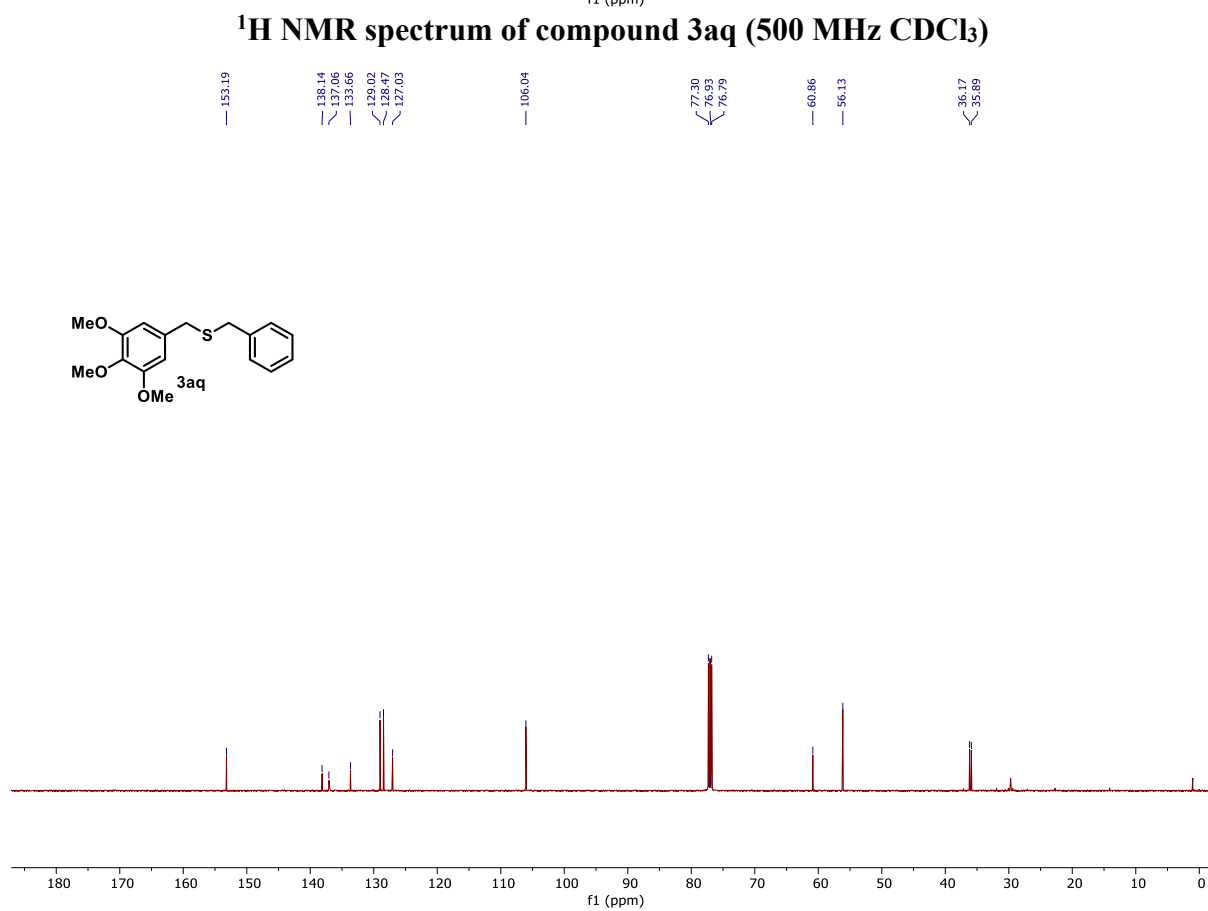

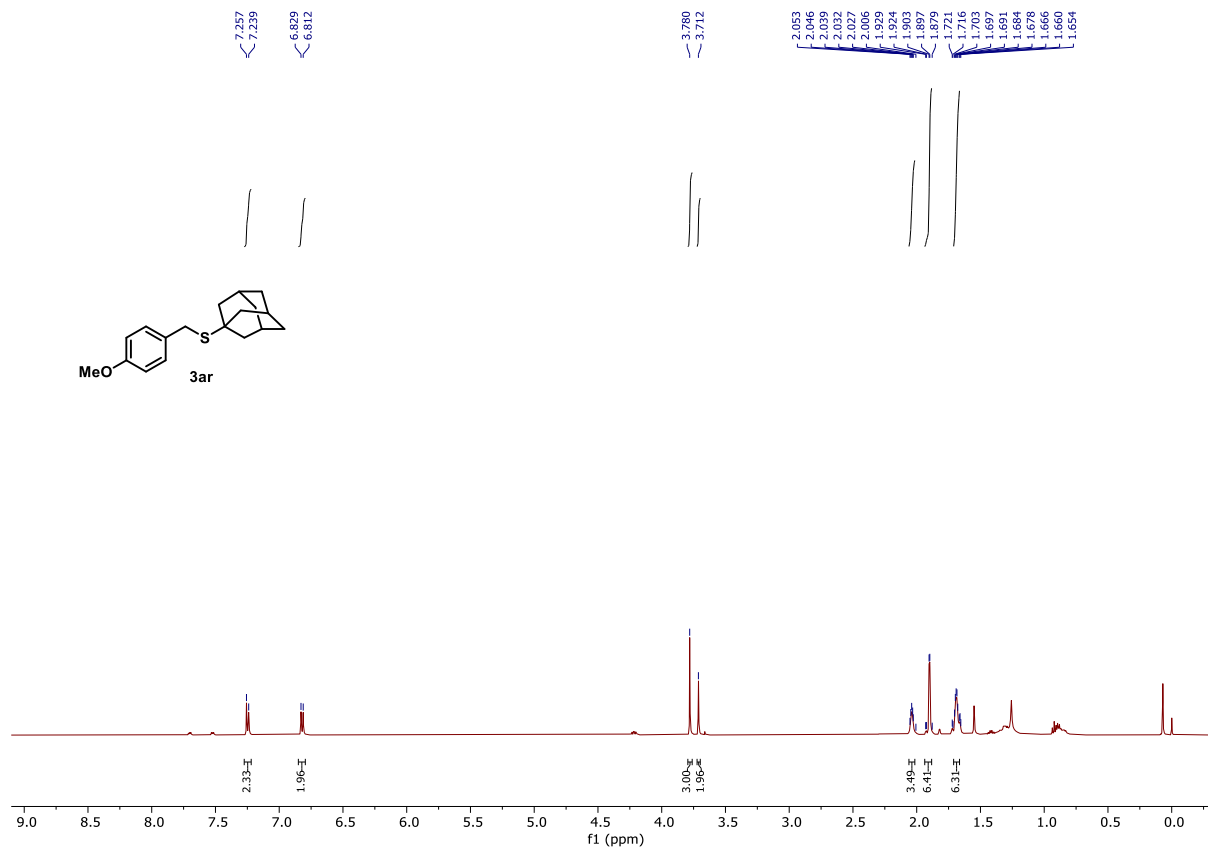

**<sup>1</sup>H NMR spectrum of compound **3ar** (500 MHz CDCl<sub>3</sub>)**

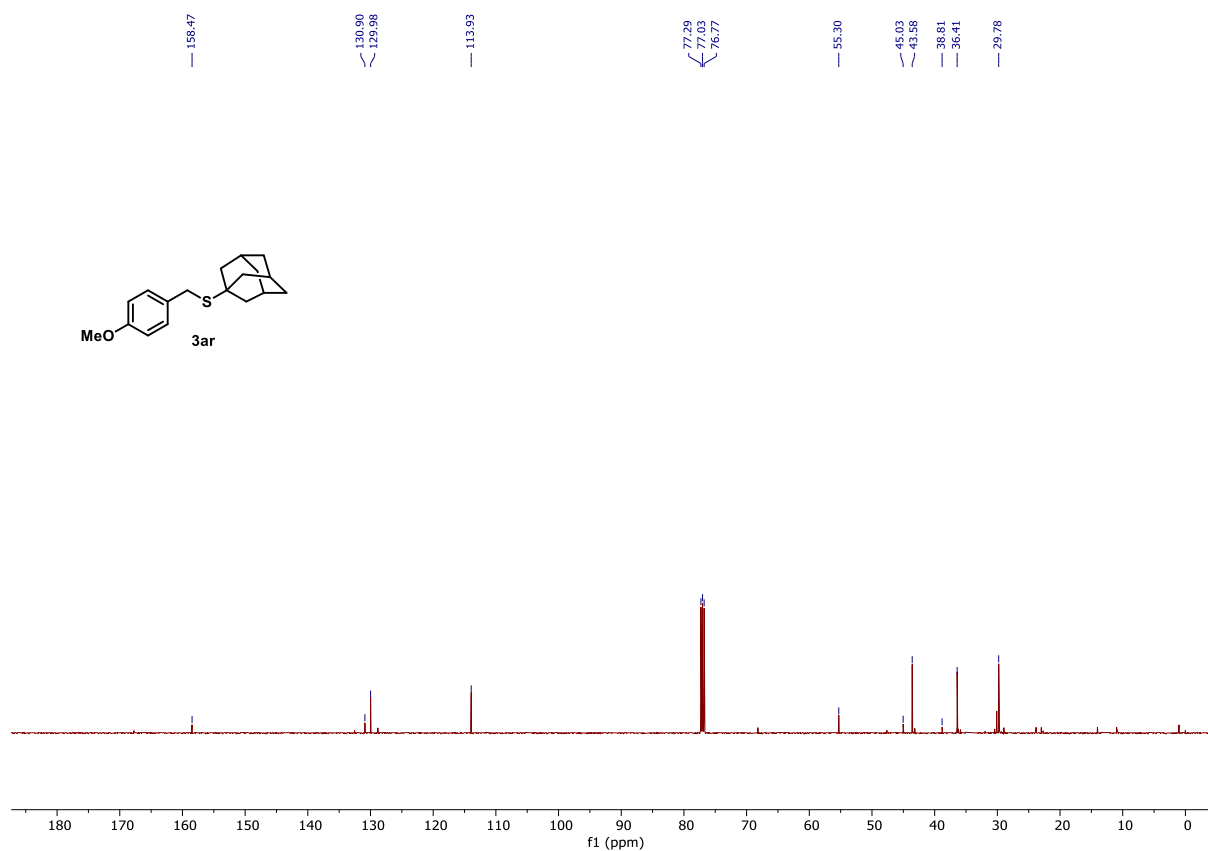

**<sup>13</sup>C NMR spectrum of compound **3ar** (126 MHz CDCl<sub>3</sub>)**

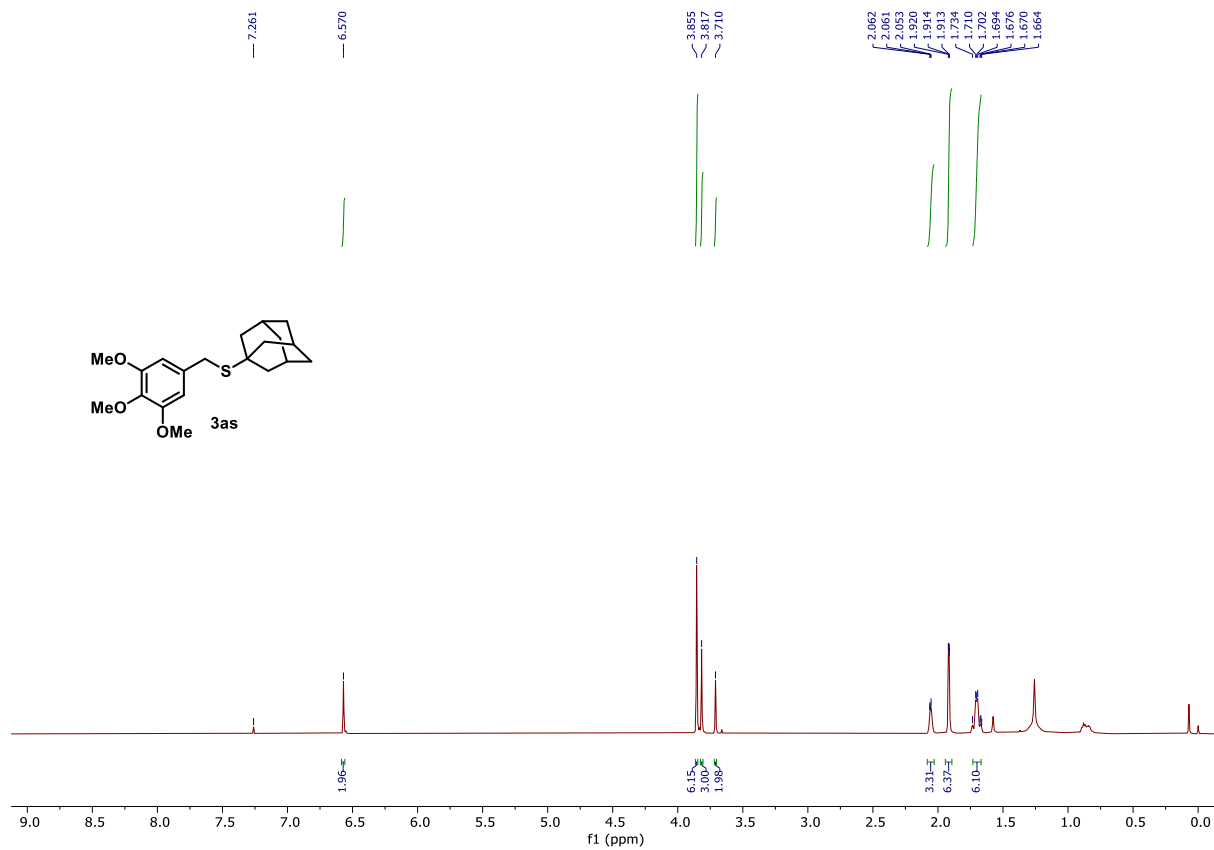

**<sup>1</sup>H NMR spectrum of compound 3as (500 MHz CDCl<sub>3</sub>)**

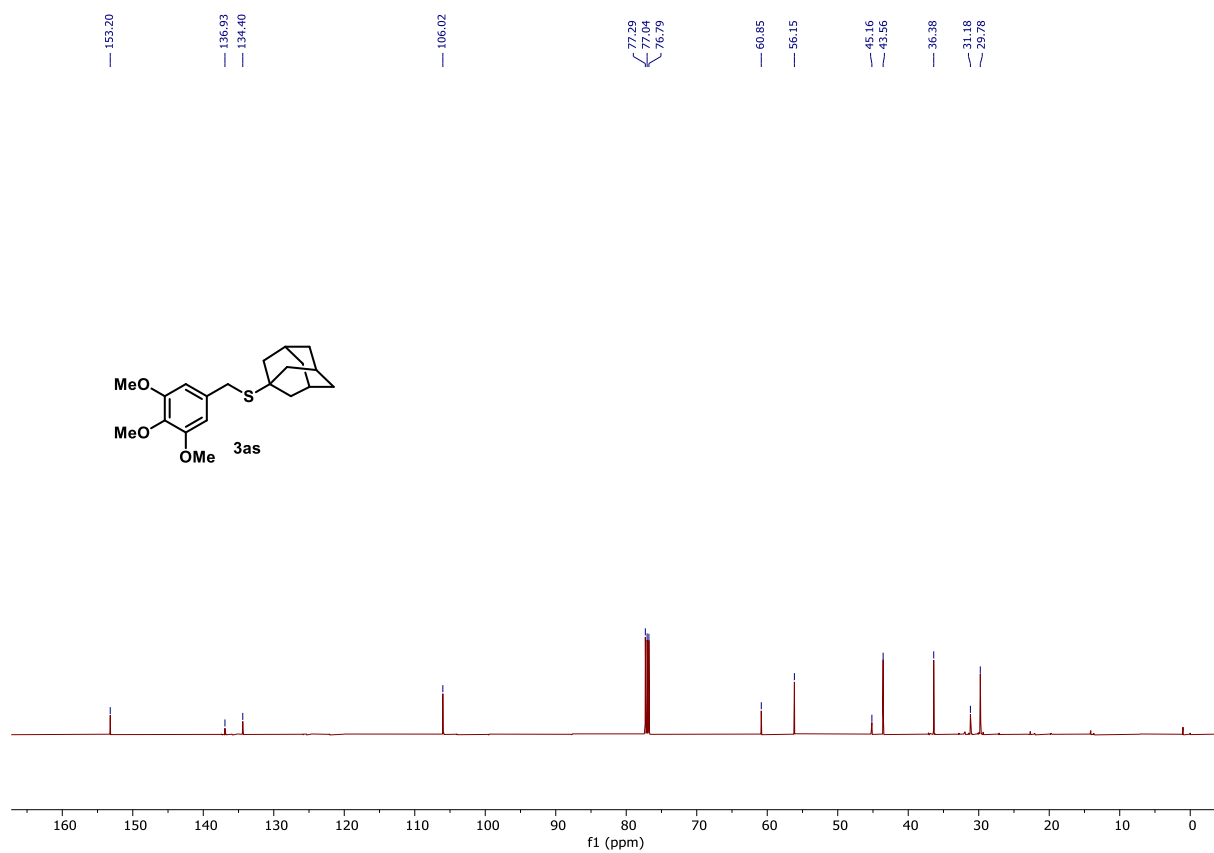

**<sup>13</sup>C NMR spectrum of compound 3as (126 MHz CDCl<sub>3</sub>)**

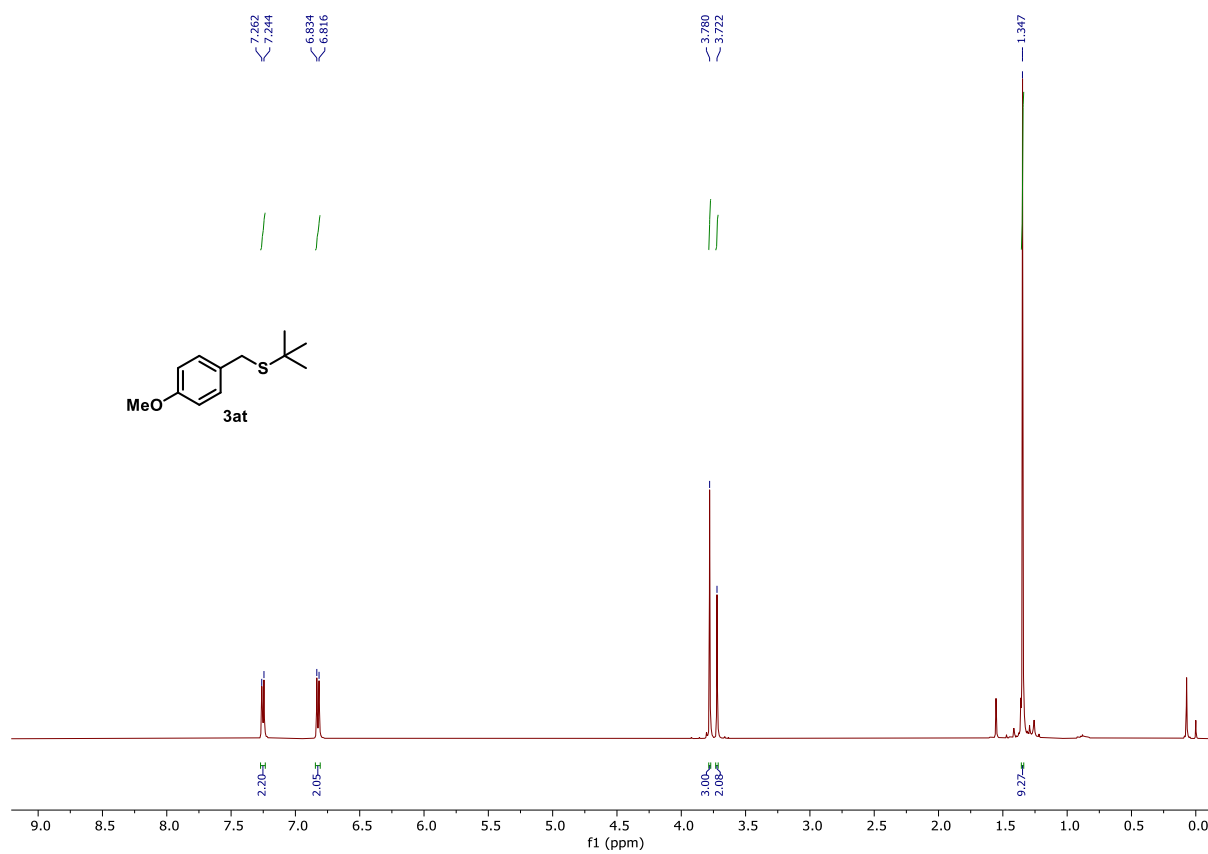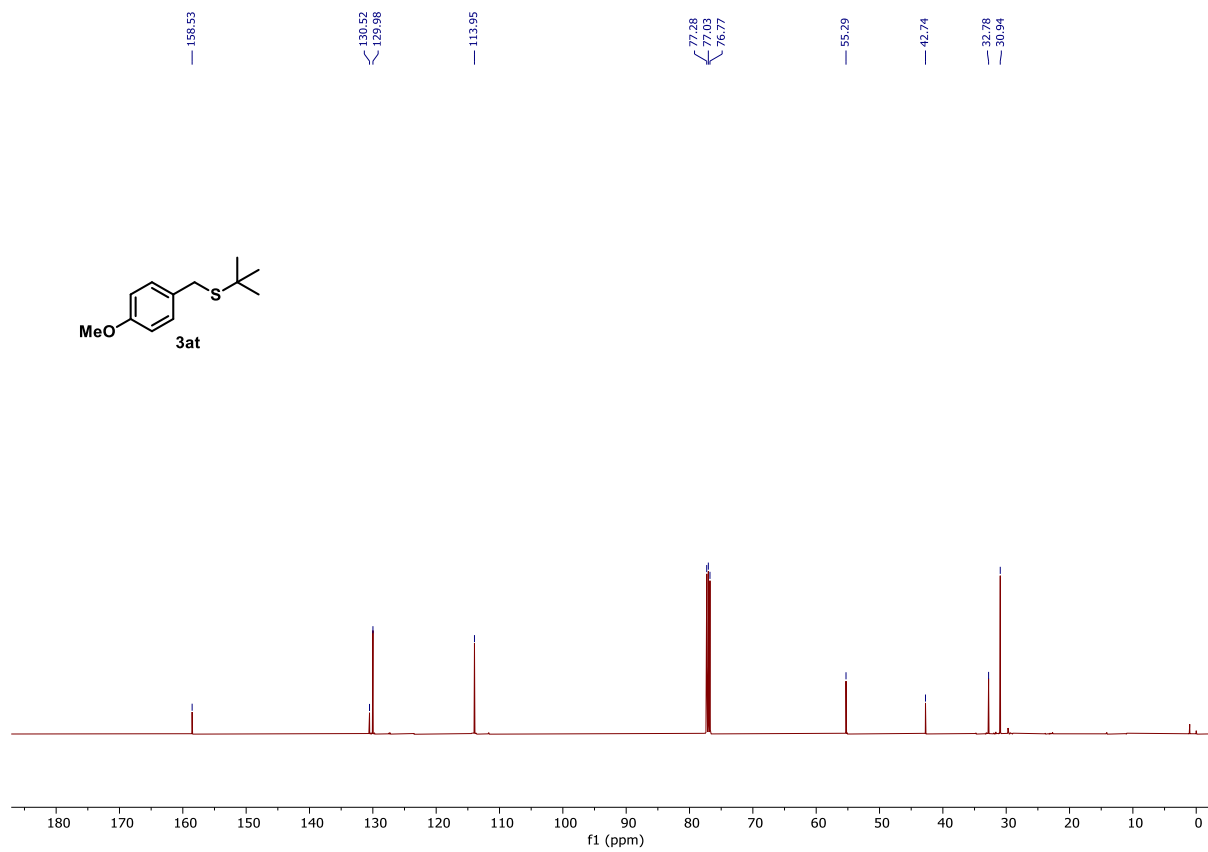



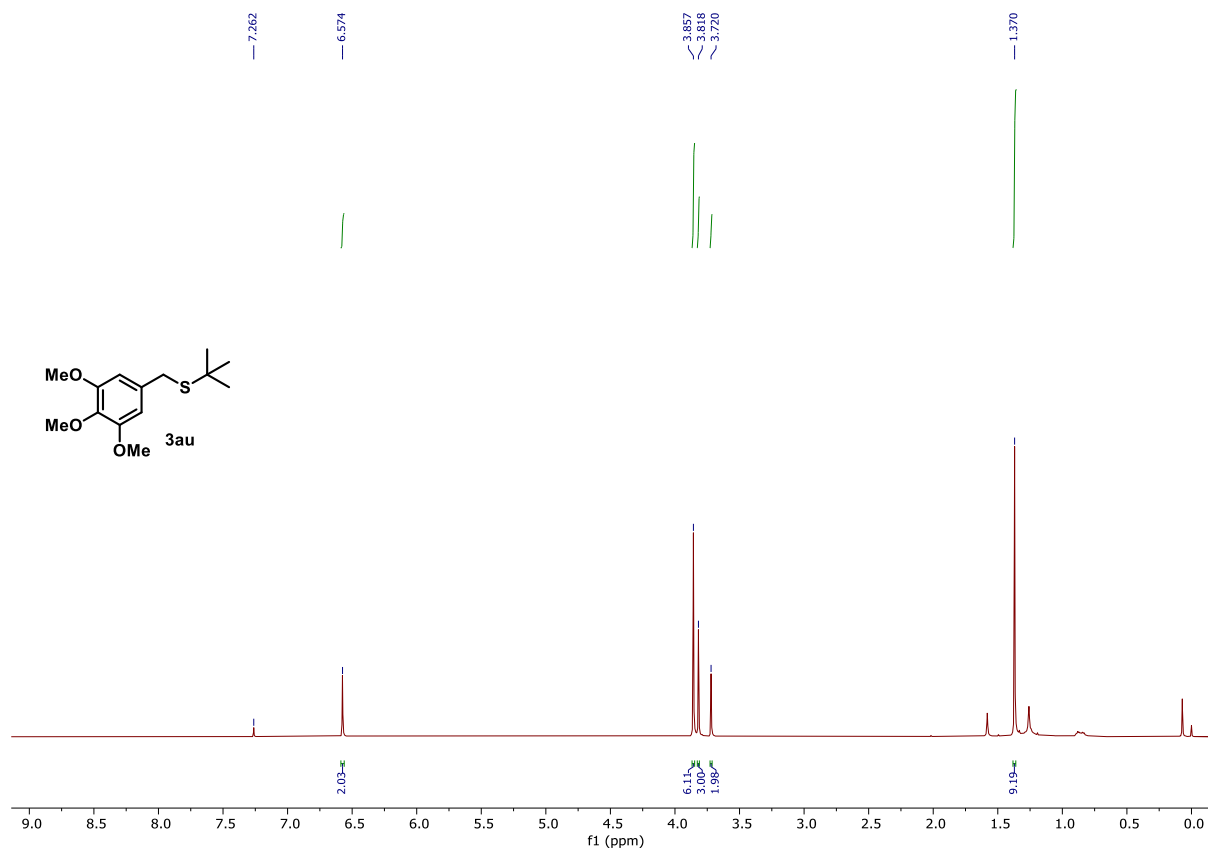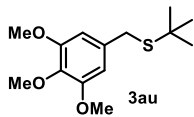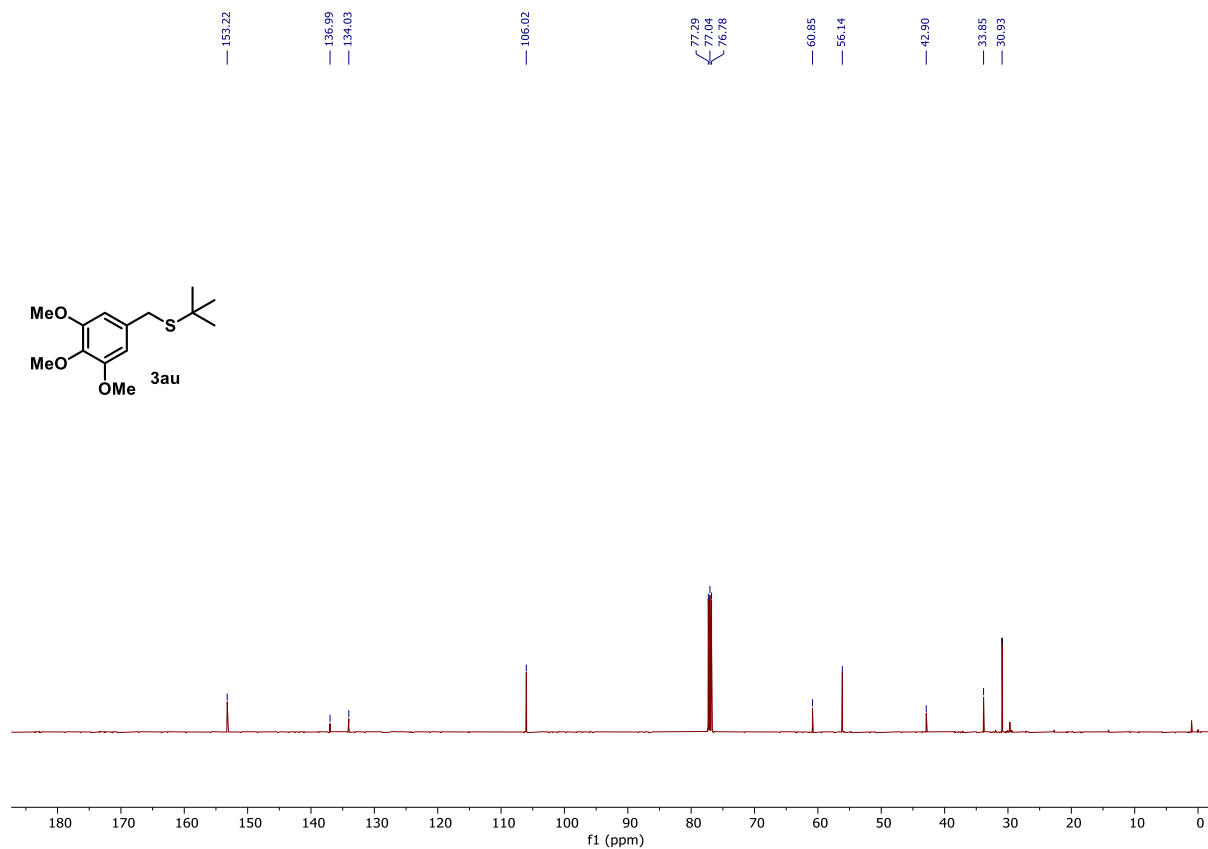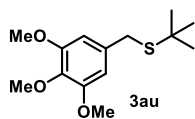

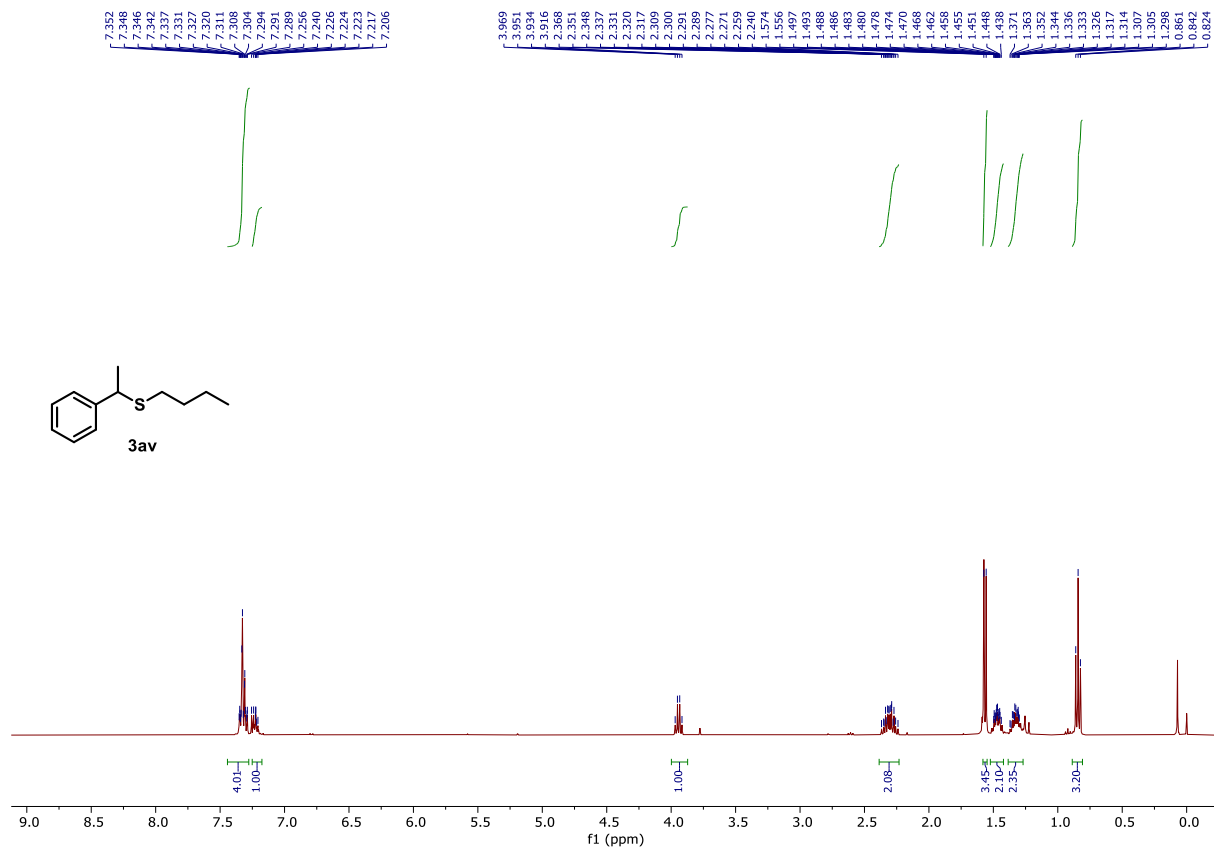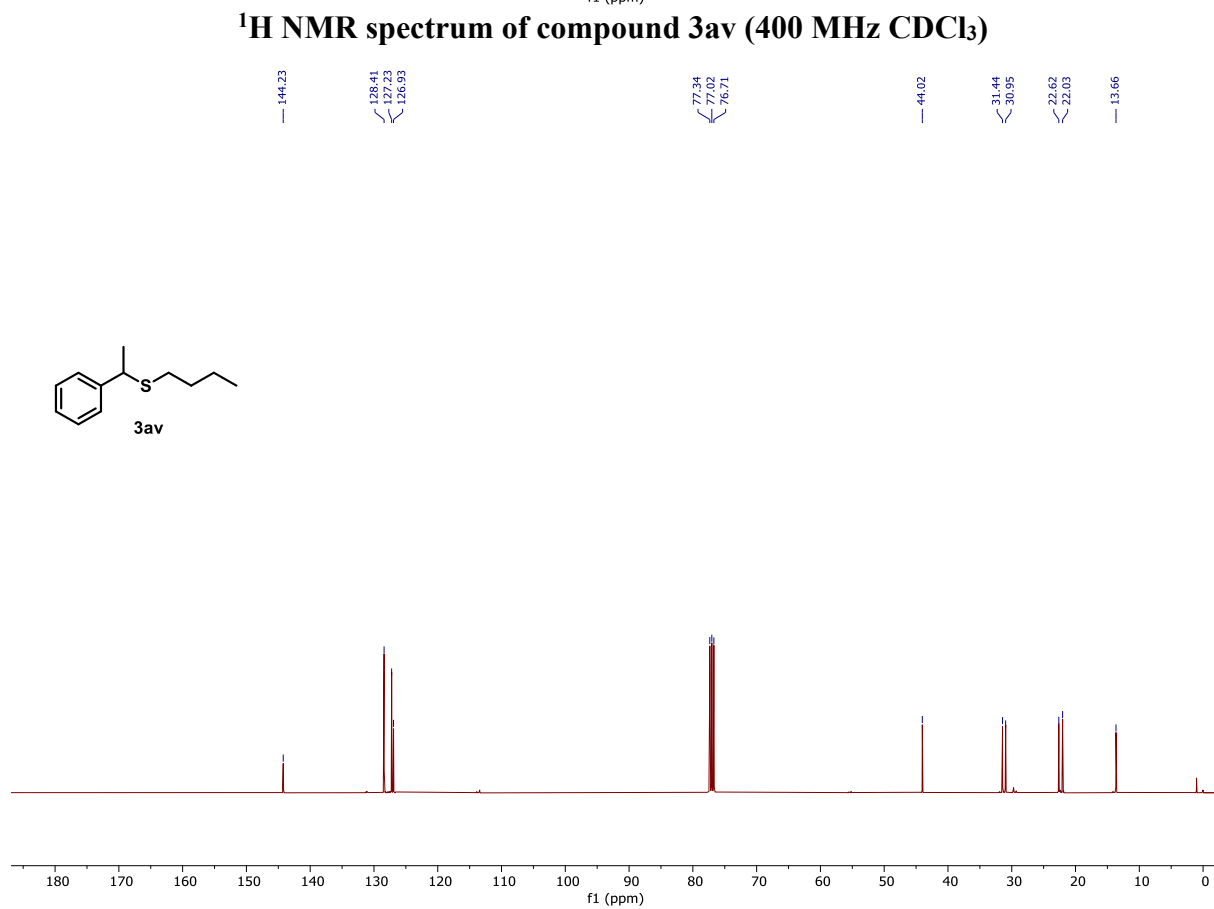

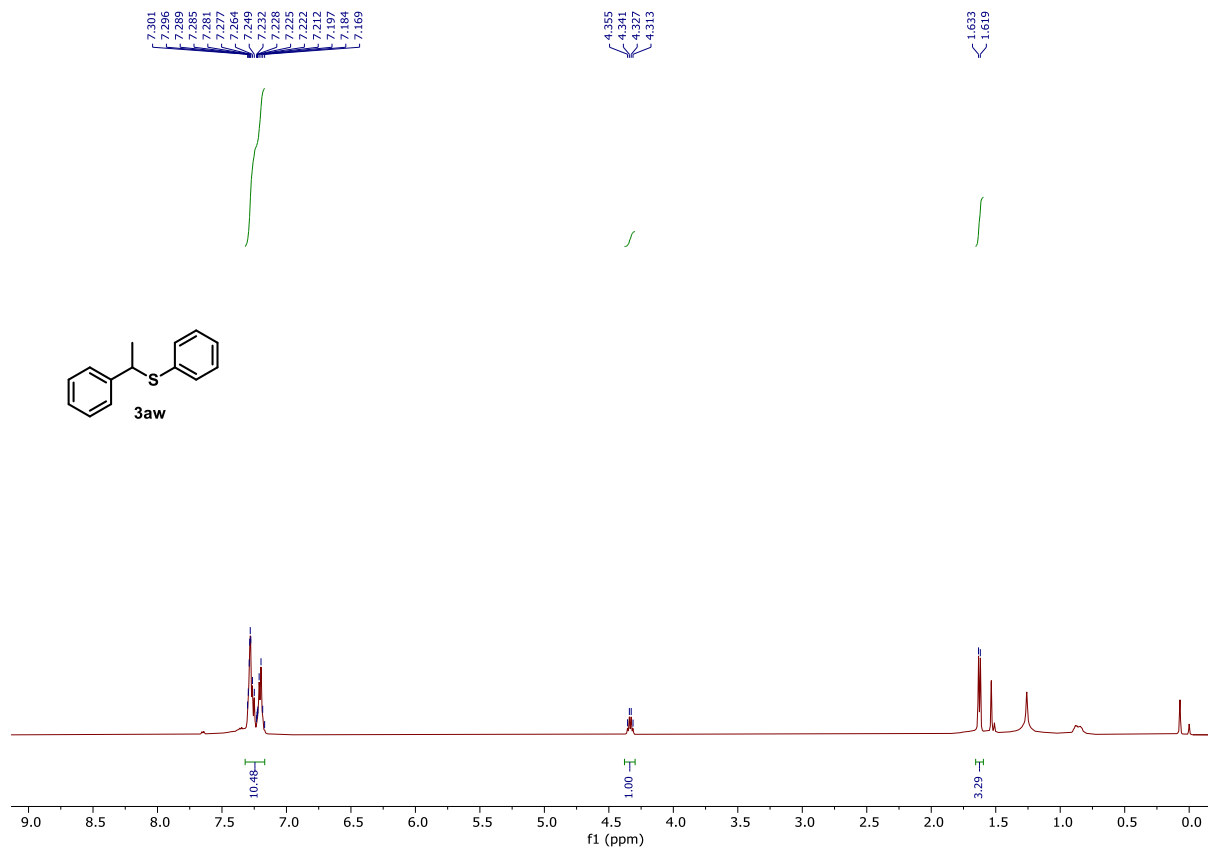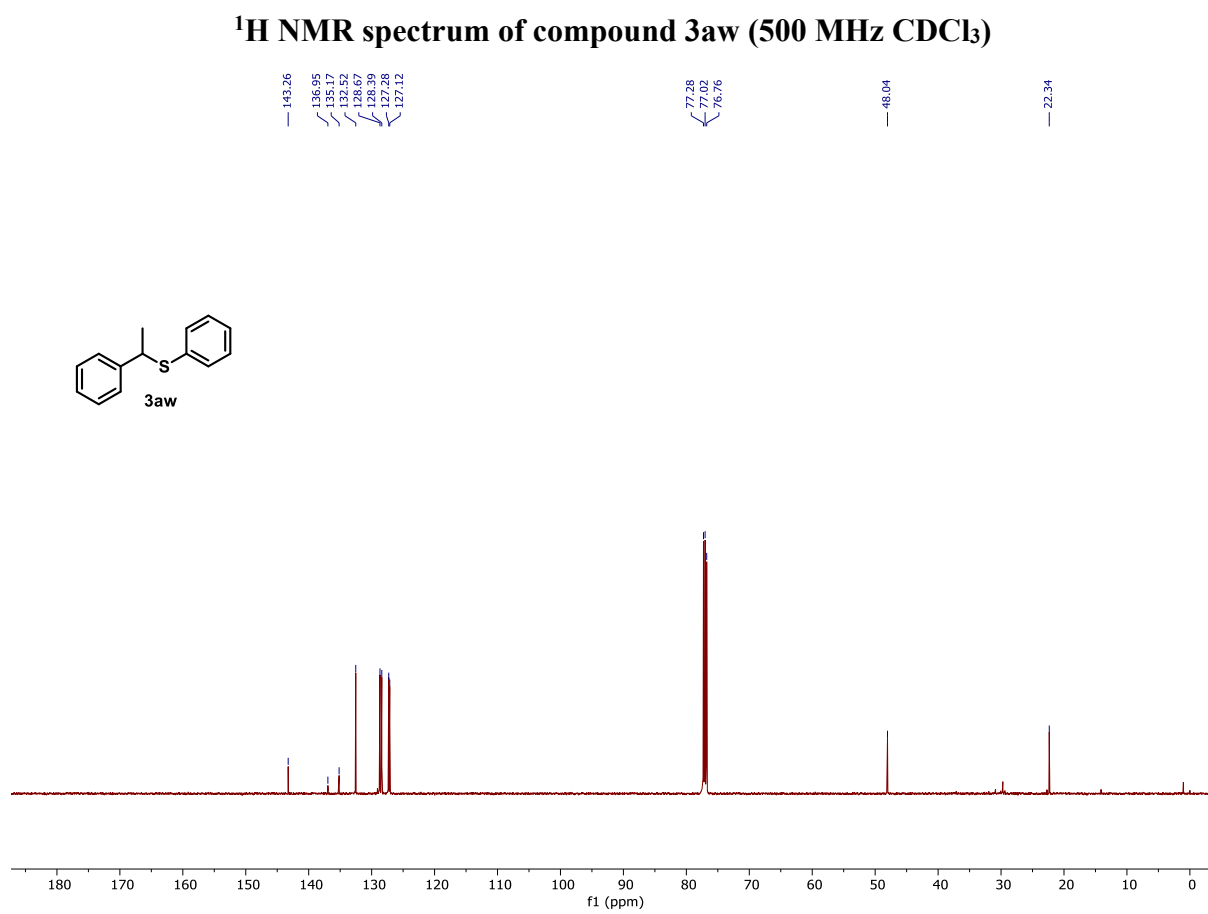

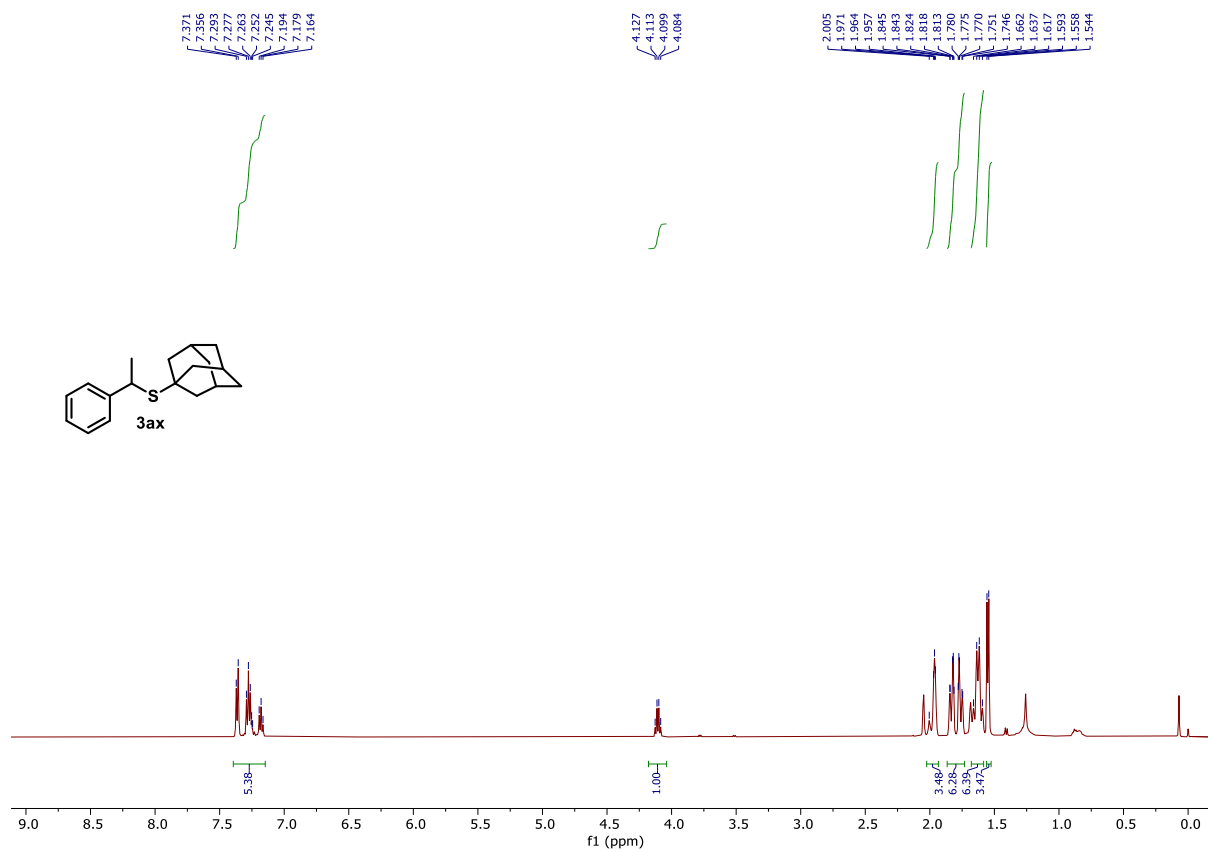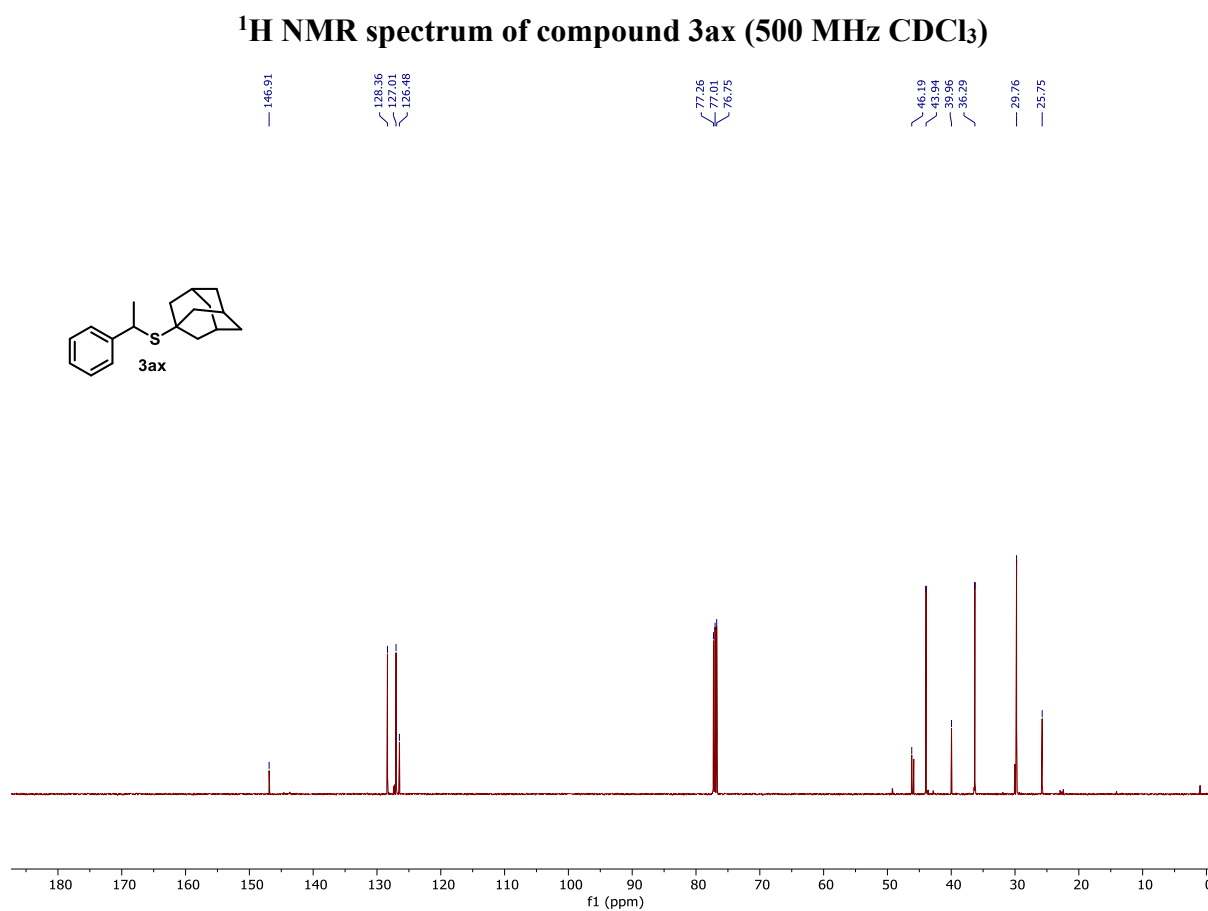

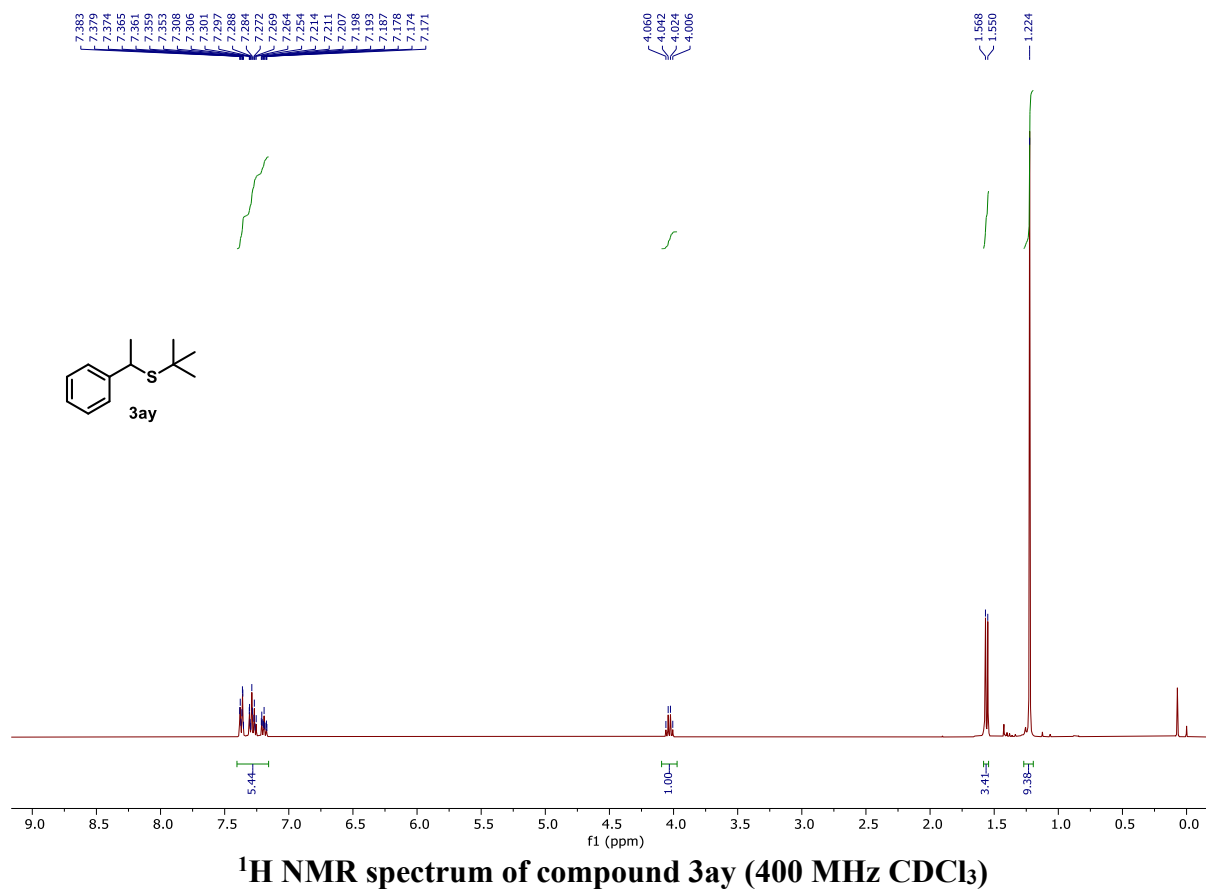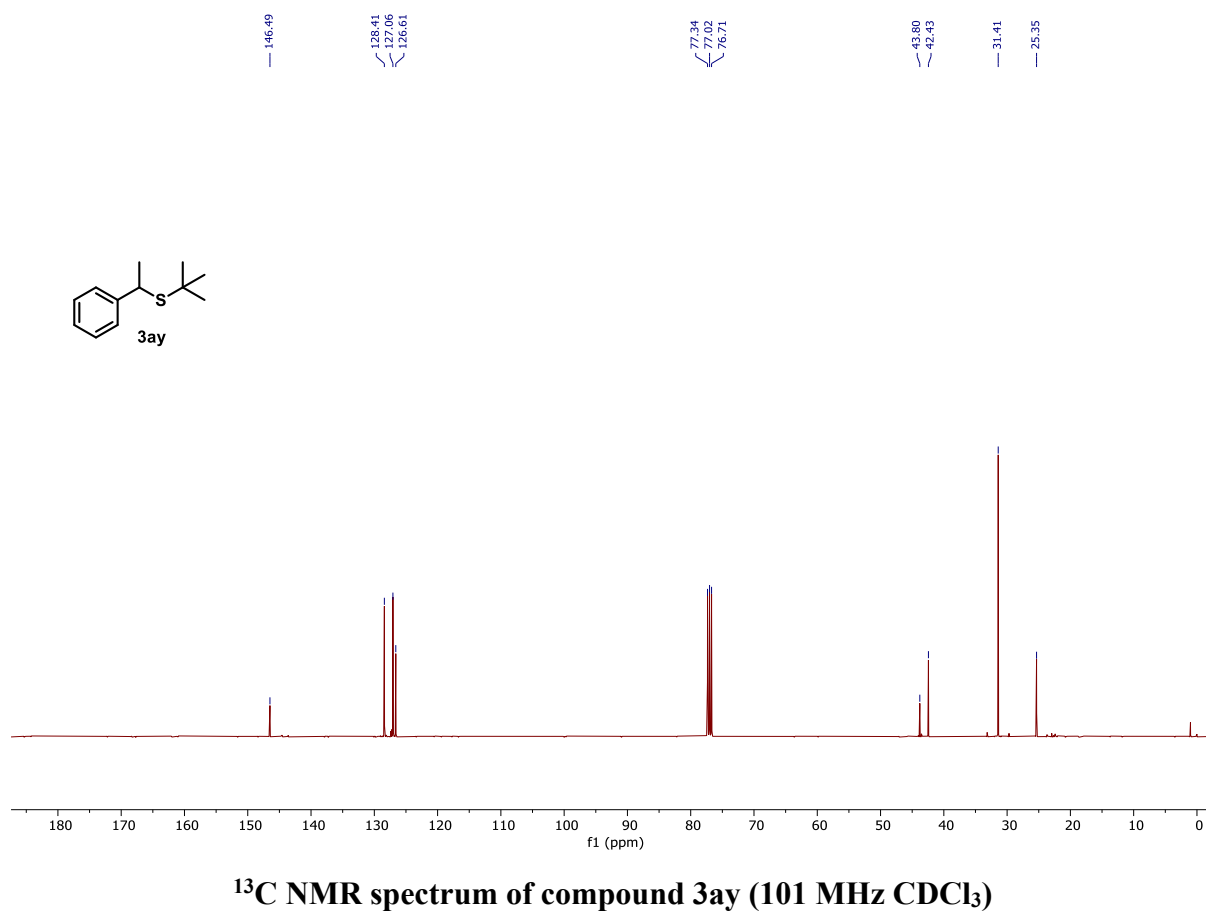

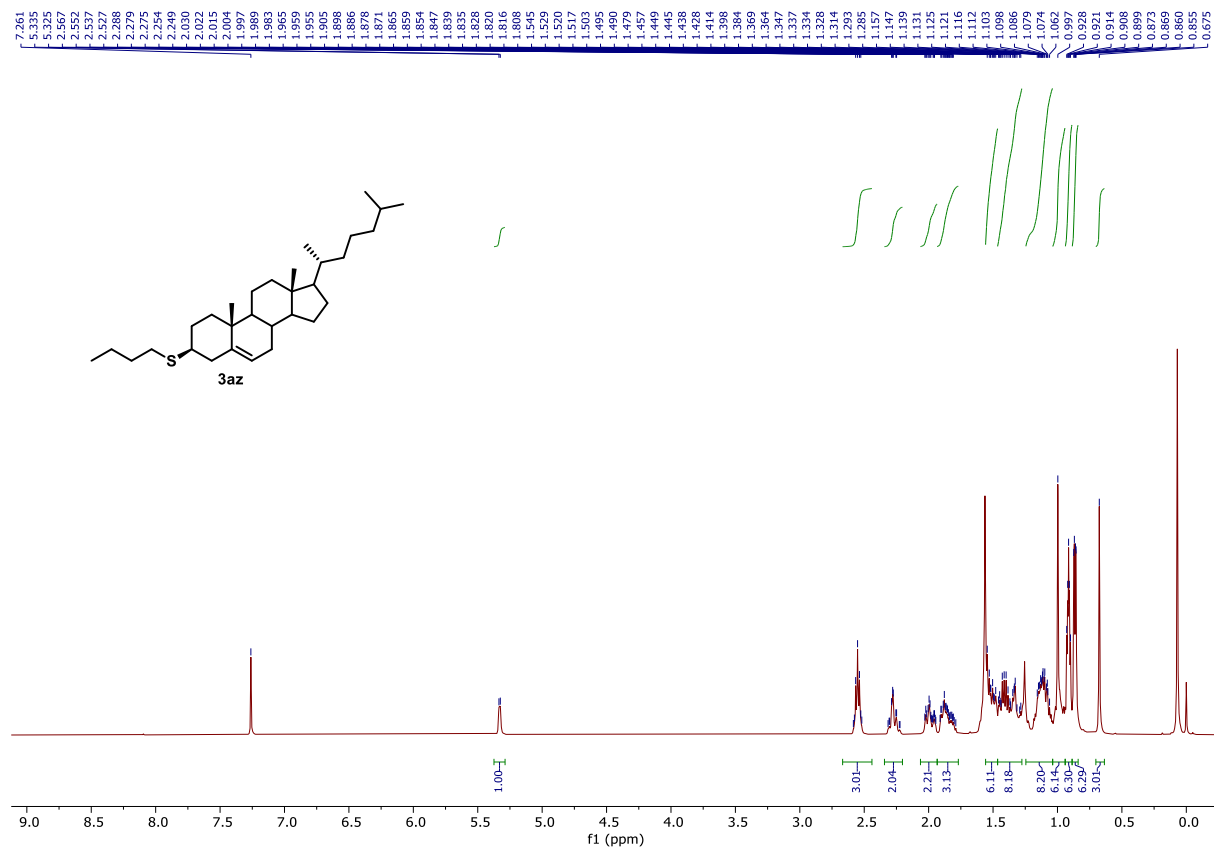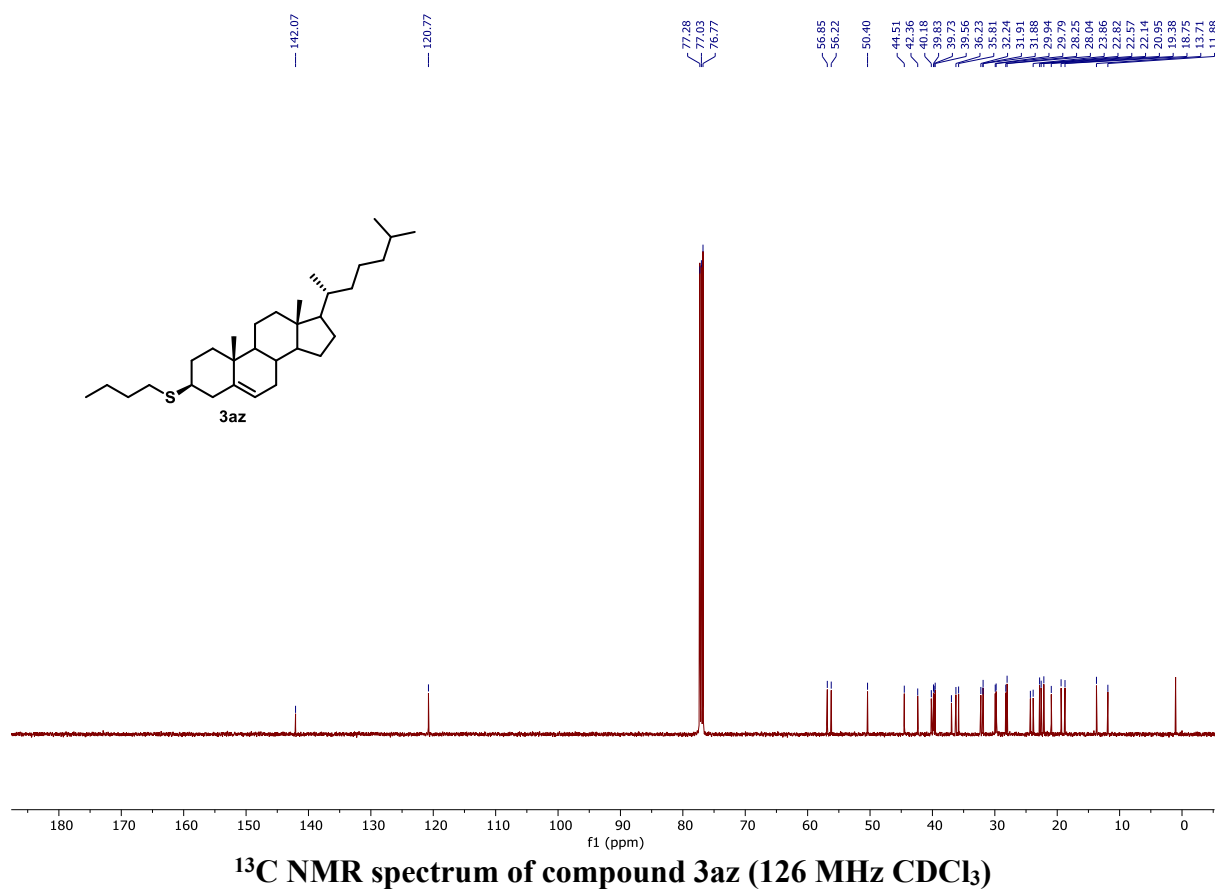

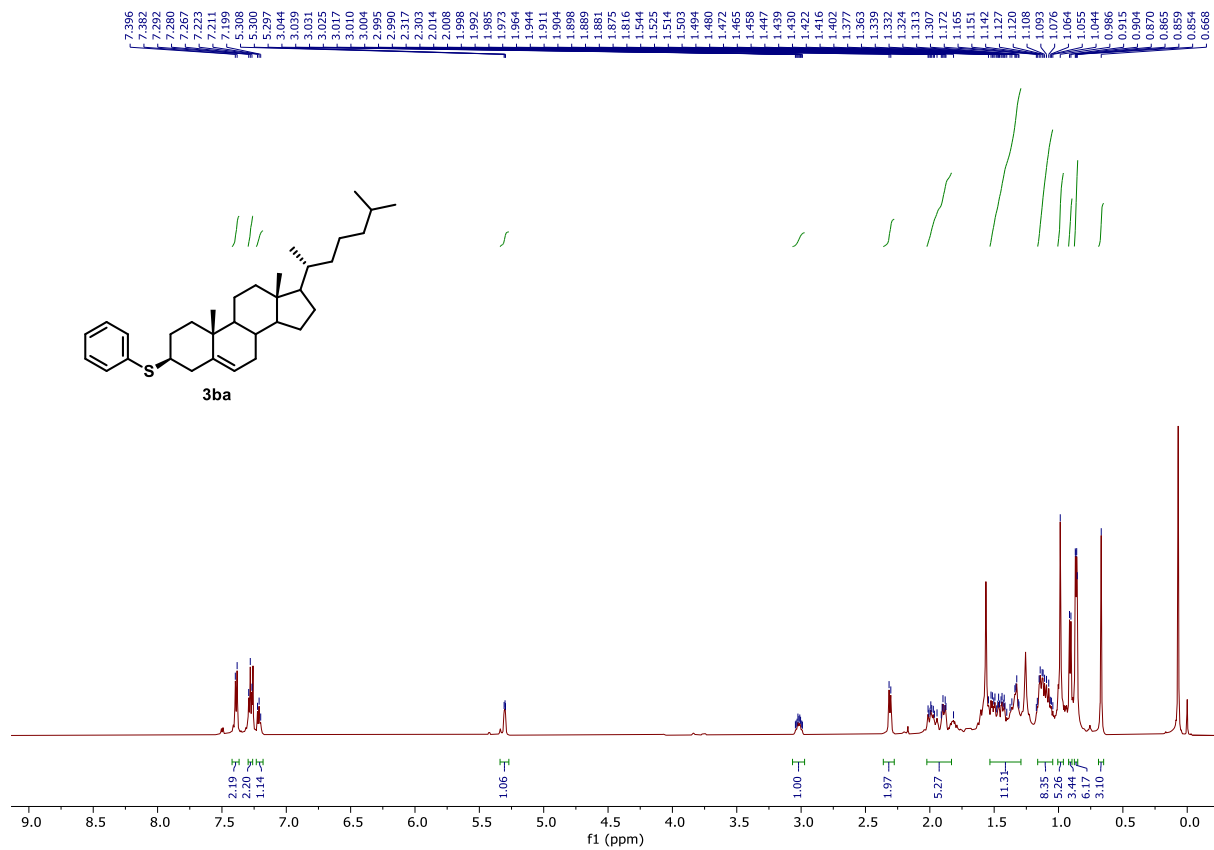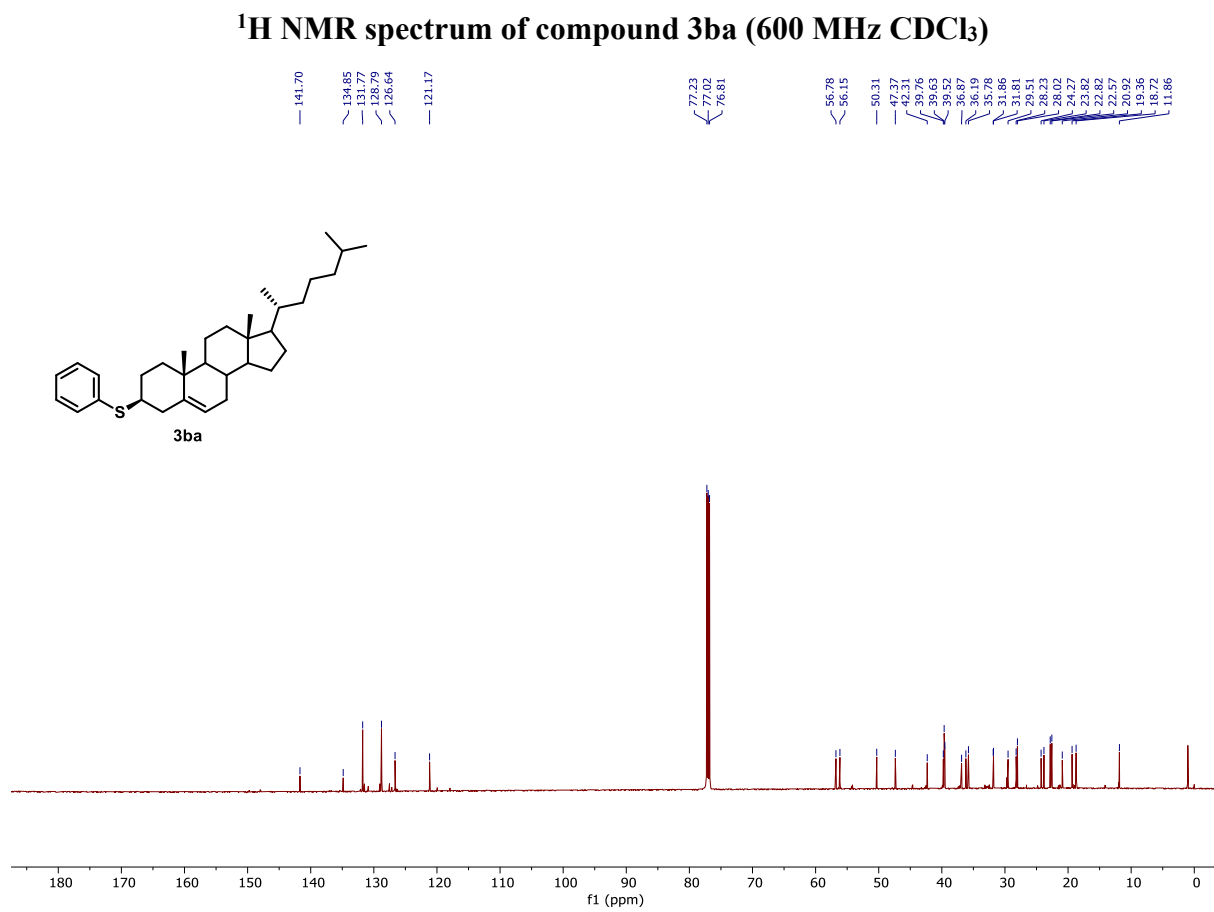

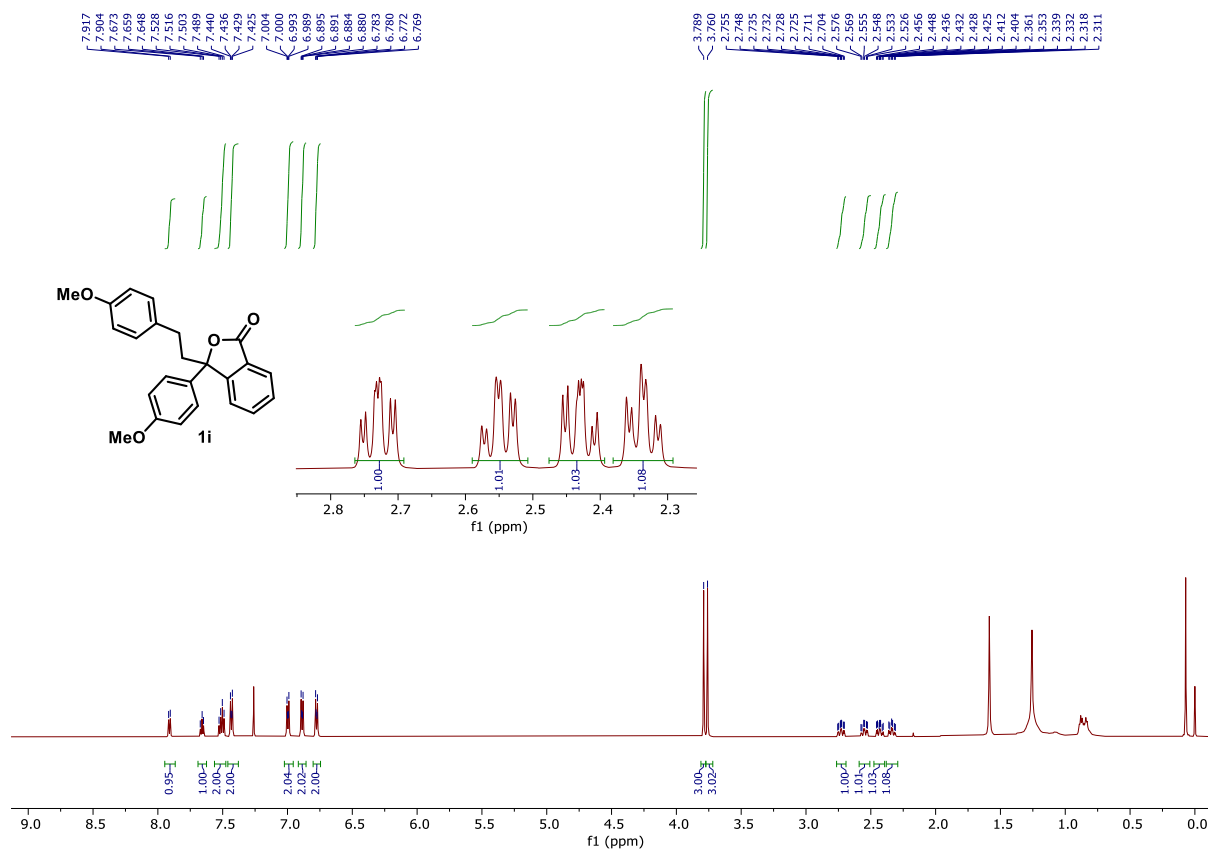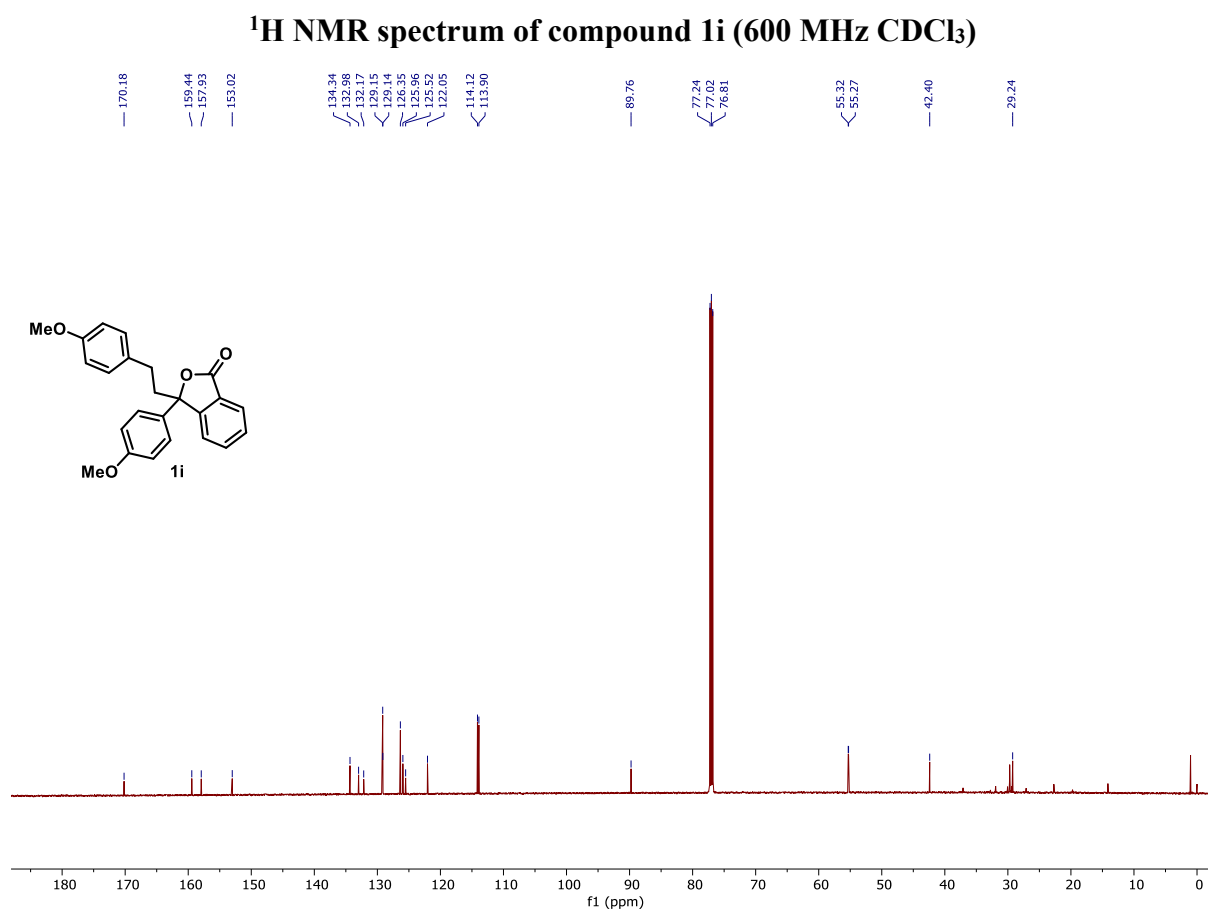



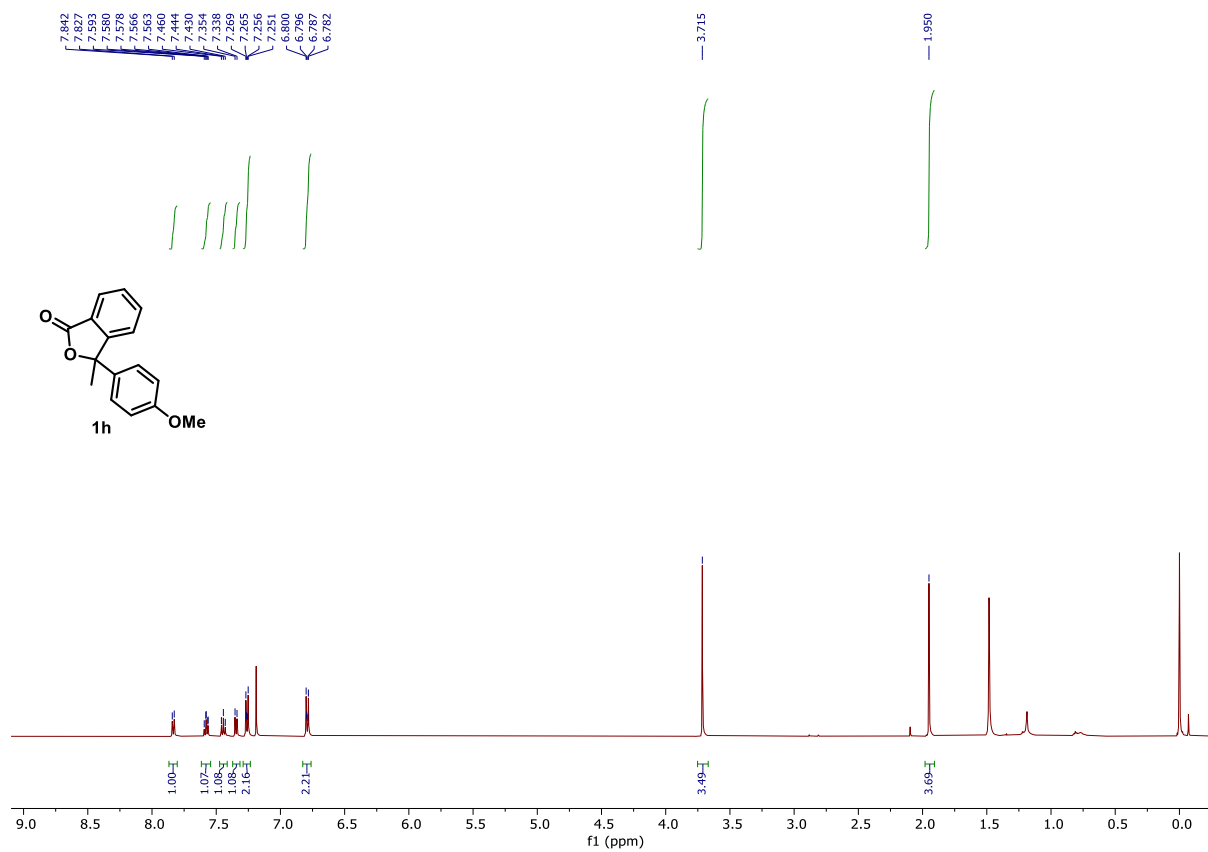

<sup>1</sup>H NMR spectrum of compound 1h (500 MHz CDCl<sub>3</sub>)

Crystal data of 1a:

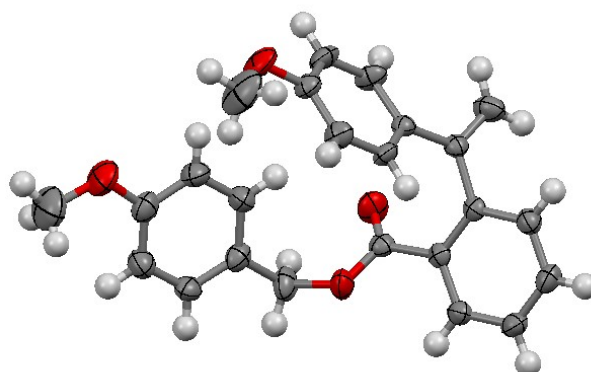

The slow diffusion obtained a single crystal of compound **1a** from the solution in dichloromethane layered with n-hexane at room temperature.

|                                            |                                                |
|--------------------------------------------|------------------------------------------------|
| Empirical formula                          | C <sub>24</sub> H <sub>22</sub> O <sub>4</sub> |
| Formula Weight                             | 374.42                                         |
| Temperature/K                              | 273                                            |
| Crystal system                             | monoclinic                                     |
| Space group                                | P 2 <sub>1</sub>                               |
| <b>a</b> /Å                                | 7.2137 (5)                                     |
| <b>b</b> /Å                                | 6.6371(5)                                      |
| <b>c</b> /Å                                | 20.4802(15)                                    |
| <b>α</b> /°                                | 90                                             |
| <b>β</b> /°                                | 95.575(2)                                      |
| <b>γ</b> /°                                | 90                                             |
| Volume/Å <sup>3</sup>                      | 975.91(12)                                     |
| Z                                          | 2                                              |
| <b>ρ</b> <sub>calc</sub> /cm <sup>-3</sup> | 1.274                                          |
| μ/mm <sup>-1</sup>                         | 0.086                                          |
| F/000                                      | 396.0                                          |
| Radiation                                  | Mo Kα (λ = 0.71073)                            |
| h,k,l/max                                  | 8,7,24                                         |
| Data completeness                          | 1.82/1.00                                      |
| θ/max                                      | 24.997                                         |
| R/reflections                              | 0.0681(3141)                                   |
| wR2/reflections                            | 0.1882(3416)                                   |
| S                                          | 1.133                                          |
| N (par)                                    | 255                                            |

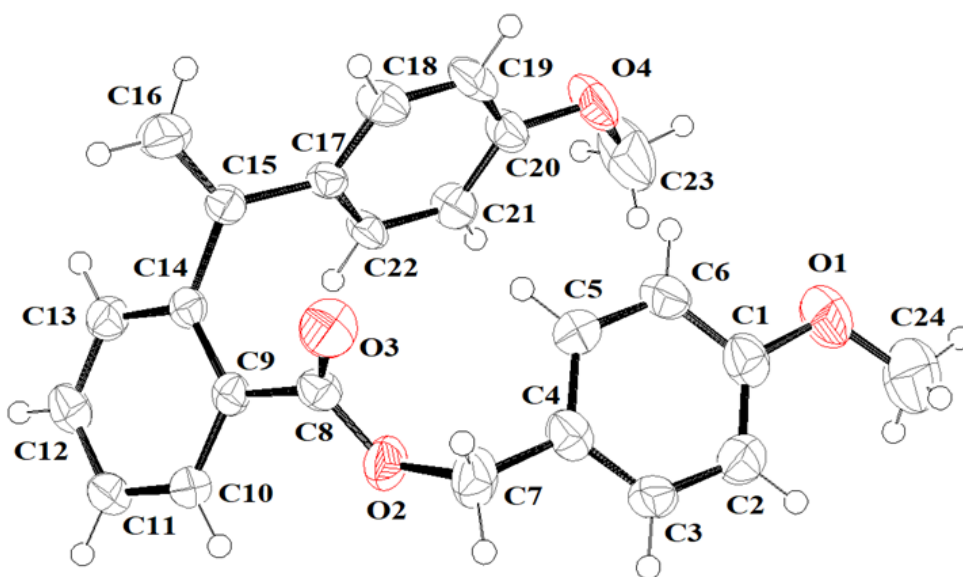

**Figure:** Ortep view of **1a**. The thermal ellipsoid contour probability level is 50%

**Crystal data of 3as:**

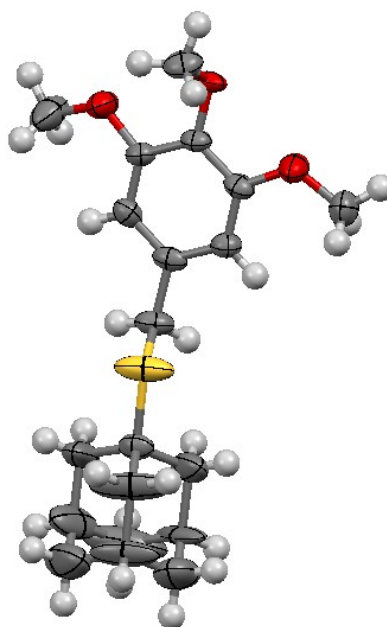

The slow diffusion obtained a single crystal of compound **3as** from the solution in dichloromethane layered with n-hexane at room temperature.

|                                            |                                                  |
|--------------------------------------------|--------------------------------------------------|
| Empirical formula                          | C <sub>20</sub> H <sub>28</sub> O <sub>3</sub> S |
| Formula Weight                             | 348.48                                           |
| Temperature/K                              | 273                                              |
| Crystal system                             | monoclinic                                       |
| Space group                                | P 2 <sub>1</sub>                                 |
| <b>a</b> /Å                                | 12.5684 (18)                                     |
| <b>b</b> /Å                                | 10.8101 (19)                                     |
| <b>c</b> /Å                                | 13.734 (3)                                       |
| <b>α</b> /°                                | 90                                               |
| <b>β</b> /°                                | 93.963 (15)                                      |
| <b>γ</b> /°                                | 90                                               |
| Volume/Å <sup>3</sup>                      | 1861.5 (6)                                       |
| Z                                          | 4                                                |
| <b>ρ</b> <sub>calc</sub> /cm <sup>-3</sup> | 1.243                                            |
| μ/mm <sup>-1</sup>                         | 0.188                                            |
| F/000                                      | 752.0                                            |
| Radiation                                  | Mo Kα (λ = 0.71073)                              |
| h,k,l/max                                  | 14, 12, 16                                       |
| Data completeness                          | 0.992                                            |
| θ/max                                      | 24.998                                           |
| R/reflections                              | 0.0851 (1116)                                    |
| wR2/reflections                            | 0.2251 (3250)                                    |
| S                                          | 0.938                                            |
| N (par)                                    | 220                                              |

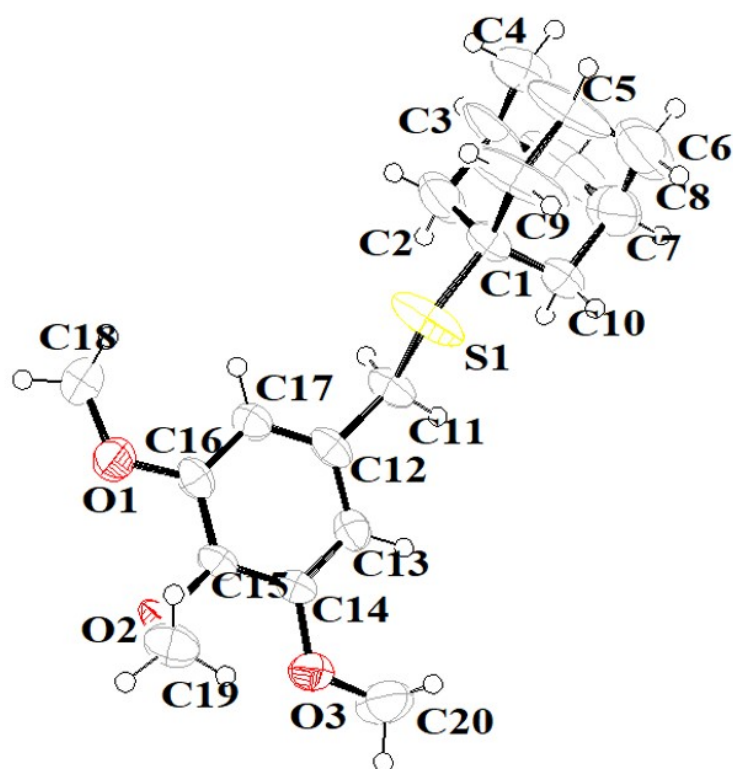

**Figure:** Ortep view of **3as**. The thermal ellipsoid contour probability level is 50%

Author's Response:

The crystal was grown numerous times in various possible ways, but it did not serve for data gathering; yet, the reported data is superior to other data collected.
